# Supplementary material for: Efficiently handling constraints in mixed-integer nonlinear programming problems using gradient-based repair differential evolution
Source: PeerJ journal article supplement (doi:10.7717/peerj-cs.2095), 2024-05-31
Supplement: Supplemental_File_2.zip [file BOToP.xls]

## Sheet: f1
-1	0	13	0	6.25687
-1	0	13	0	5.91378
-1	0	13	0	5.97582
-1	0	13	0	5.72332
-1	0	13	0	6.19357
-1	0	13	0	6.57339
-1	0	13	0	5.9243
-1	0	13	0	5.79292
-1	0	13	0	6.20652
-1	0	13	0	5.91205
-1	0	13	0	6.51981
-1	0	13	0	6.76472
-1	0	13	0	5.81435
-1	0	13	0	5.73808
-1	0	13	0	5.63675
-1	0	13	0	6.33539
-1	0	13	0	5.87631
-1	0	13	0	6.47394
-1	0	13	0	5.87832
-1	0	13	0	5.88479
-1	0	13	0	5.65834
-1	0	13	0	6.10753
-1	0	13	0	5.68807
-1	0	13	0	6.421
-1	0	13	0	5.87519
-1	0	13	0	6.10806
-1	0	13	0	6.00756
-1	0	13	0	5.80374
-1	0	13	0	6.42547
-1	0	13	0	6.40156

## Sheet: f2
4.61952e-09	1	1	1	0	3.52831
-9.24775e-09	1	1	1	0	3.32315
9.52706e-09	1	1	1	0	3.48873
7.80344e-10	1	1	1	0	3.50311
9.64139e-11	1	1	1	0	3.28283
9.86495e-09	1	1	1	0	3.32197
-2.19808e-10	1	1	1	0	3.34847
5.62038e-09	1	1	1	0	3.38096
3.67266e-09	1	1	1	0	3.31412
-5.08269e-09	1	1	1	0	3.39289
3.78324e-09	1	1	1	0	3.30568
-1.8274e-09	1	1	1	0	3.29977
6.10819e-09	1	1	1	0	3.28432
-1.81585e-09	1	1	1	0	3.21827
-4.07252e-09	1	1	1	0	3.26761
4.79349e-09	1	1	1	0	3.35436
-8.56742e-09	1	1	1	0	3.21171
6.50268e-09	1	1	1	0	3.32219
2.08171e-09	1	1	1	0	3.27142
-3.39214e-09	1	1	1	0	3.2392
4.11296e-09	1	1	1	0	3.31096
4.89443e-09	1	1	1	0	3.35654
4.91145e-09	1	1	1	0	3.23254
7.44704e-10	1	1	1	0	3.37081
-7.81778e-09	1	1	1	0	3.23583
-3.93158e-09	1	1	1	0	3.41013
9.04822e-09	1	1	1	0	3.37998
2.44552e-09	1	1	1	0	3.81449
-4.30311e-09	1	1	1	0	3.44865
8.19284e-10	1	1	1	0	3.4022

## Sheet: f3
1	3	-4	0	7.20709
1	3	-4	0	7.07732
1	3	-4	0	7.1536
1.5	2	-3.5	0	6.95877
1	3	-4	0	6.91271
1	3	-4	0	6.88568
1	3	-4	0	7.24897
1	3	-4	0	7.65206
1	3	-4	0	7.63704
1	3	-4	0	7.26983
1	3	-4	0	7.83601
1	3	-4	0	7.16656
1	3	-4	0	7.4218
1	3	-4	0	7.1021
1	3	-4	0	7.14495
1	3	-4	0	7.37531
1	3	-4	0	7.58863
1	3	-4	0	7.51422
1	3	-4	0	7.31593
1	3	-4	0	7.32463
1	3	-4	0	7.2491
1	3	-4	0	7.44879
1	3	-4	0	7.91923
1	3	-4	0	7.49289
1	3	-4	0	7.17636
1	3	-4	0	7.02626
1	3	-4	0	7.47312
1	3	-4	0	7.927
1	3	-4	0	7.11366
1	3	-4	0	7.1665

## Sheet: f4
3	3	-6	0	5.00672
3	3	-6	0	4.61237
3	3	-6	0	4.68543
3	3	-6	0	4.94266
3	3	-6	0	4.59251
3	3	-6	0	4.78205
3	3	-6	0	4.80031
3	3	-6	0	5.04761
3	3	-6	0	4.97205
3	3	-6	0	5.03274
3	3	-6	0	5.05589
3	3	-6	0	5.09339
3	3	-6	0	5.03039
3	3	-6	0	5.11432
3	3	-6	0	4.97569
3	3	-6	0	4.86411
3	3	-6	0	4.88313
3	3	-6	0	4.72989
3	3	-6	0	4.58655
3	3	-6	0	5.05405
3	3	-6	0	4.72164
3	3	-6	0	5.13961
3	3	-6	0	5.04045
3	3	-6	0	5.17155
3	3	-6	0	5.35952
3	3	-6	0	4.83067
3	3	-6	0	4.57109
3	3	-6	0	4.69366
3	3	-6	0	4.90228
3	3	-6	0	5.16085

## Sheet: f5
0.99995	1	0.24995	0	1.63222
0.99995	1	0.24995	0	2.79663
0.99995	1	0.24995	0	2.23051
0.99995	1	0.24995	0	2.01253
0.99995	1	0.24995	0	2.1541
0.99995	1	0.24995	0	2.02405
0.99995	1	0.24995	0	1.91121
0.99995	1	0.24995	0	2.21822
0.99995	1	0.24995	0	3.21861
0.99995	1	0.24995	0	2.77672
0.99995	1	0.24995	0	2.48352
0.99995	1	0.24995	0	1.99889
0.99995	1	0.24995	0	2.77089
0.99995	1	0.24995	0	2.25907
0.99995	1	0.24995	0	2.61695
0.01	0	1.2401	0	2.0131
0.99995	1	0.24995	0	1.76582
0.99995	1	0.24995	0	3.14534
0.99995	1	0.24995	0	3.04214
0.99995	1	0.24995	0	1.85839
0.99995	1	0.24995	0	2.65591
0.99995	1	0.24995	0	3.45949
0.99995	1	0.24995	0	2.14173
0.99995	1	0.24995	0	1.87088
0.99995	1	0.24995	0	1.90169
0.99995	1	0.24995	0	2.25123
0.99995	1	0.24995	0	3.26913
0.99995	1	0.24995	0	2.04135
0.01	0	1.2401	0	2.2724
0.99995	1	0.24995	0	3.05443

## Sheet: f6
14.225	1	-6783.58	0	5.6507
14.225	1	-6783.58	0	5.70927
14.225	1	-6783.58	0	5.61691
14.225	1	-6783.58	0	5.51102
14.225	1	-6783.58	0	5.81162
14.225	1	-6783.58	0	5.73999
14.225	1	-6783.58	0	5.84607
14.225	1	-6783.58	0	6.25879
14.225	1	-6783.58	0	6.33321
14.225	1	-6783.58	0	5.71814
14.225	1	-6783.58	0	5.66207
14.225	1	-6783.58	0	5.76498
14.225	1	-6783.58	0	5.58185
14.225	1	-6783.58	0	5.60328
14.225	1	-6783.58	0	5.74464
14.225	1	-6783.58	0	6.03177
14.225	1	-6783.58	0	5.90771
14.225	1	-6783.58	0	5.81886
14.225	1	-6783.58	0	5.74959
14.225	1	-6783.58	0	5.82819
14.225	1	-6783.58	0	5.57525
14.225	1	-6783.58	0	5.46636
14.225	1	-6783.58	0	5.7179
14.225	1	-6783.58	0	5.84492
14.225	1	-6783.58	0	5.70945
14.225	1	-6783.58	0	5.56953
14.225	1	-6783.58	0	5.73782
14.225	1	-6783.58	0	5.7651
14.225	1	-6783.58	0	5.30908
14.225	1	-6783.58	0	5.57254

## Sheet: f7
-0.999967	0	2.91331	0	-0.716339	1	0.000346542	1.72579
-0.99999	0	2.99892	0	-0.0802604	1	0	1.69265
-0.999982	0	-2.90851	0	0.735224	1	0	2.69531
-1	0	-2.97686	0	0.37186	1	0	1.77034
-1	0	2.98493	0	-0.300326	1	0	1.73711
-0.99999	0	-2.98069	0	0.339885	1	0	1.7171
-1.25994	1	2.48314	1	0.496648	0.211439	0	1.74076
-1.25994	1	1.83817	2	0.183827	0.426784	0	1.73497
-0.999994	0	-2.90143	0	-0.762719	1	0	1.71846
-0.999981	0	-1.55789	0	2.5638	1	0	1.76003
-1.00002	0	2.98281	0	0.320595	1	0	3.82241
-1.00003	0	2.41181	0	1.78379	1	0.00110854	1.73472
-1.25994	1	-2.48314	-1	0.496648	0.211439	0	1.6996
-1	0	2.991	0	0.232448	1	0	1.70397
-0.999967	0	0.356642	0	-2.97945	1	0.00413067	1.7852
-1.25994	1	-2.48314	1	-0.496648	0.211439	0	1.70295
-1.00001	0	-2.98858	0	-0.261456	1	0	3.58812
-1.00001	0	-2.99974	0	0.0383683	1	0	1.67721
-0.999986	0	2.99933	0	-0.0629448	1	0	1.69629
-1.00001	0	2.96749	0	0.440369	1	0	1.7502
-1.00002	0	-2.99881	0	0.084762	1	0	1.731
-1.25994	1	2.48314	-1	-0.496648	0.211439	0	1.71189
NaN	NaN	NaN	NaN	NaN	NaN	2.21292e-09	1.81499
-1.00001	0	-2.98731	0	-0.275575	1	0	2.0797
-0.999967	0	0.784946	0	2.89666	1	0.00660122	1.71701
-0.999975	0	-2.96679	0	-0.445333	1	0	1.75968
-0.999989	0	2.99338	0	0.199362	1	0	1.66599
-0.999992	0	2.99171	0	-0.222759	1	0	1.69065
-0.999991	0	-2.97977	0	0.347841	1	0	1.68041
-1.25994	1	2.48314	1	0.496648	0.211439	0	1.67959

## Sheet: f8
555.554	1520	5000	180	300	220	280	400	7075.55	0	8.61263
555.554	1520	5000	180	300	220	280	400	7075.55	0	8.6721
555.554	1520	5000	180	300	220	280	400	7075.55	0	8.5985
357.142	1260	5500	160	280	240	280	380	7117.14	0	8.63072
555.554	1520	5000	180	300	220	280	400	7075.55	0	8.70473
555.554	1520	5000	180	300	220	280	400	7075.55	0	8.94705
555.554	1520	5000	180	300	220	280	400	7075.55	0	8.52109
555.554	1520	5000	180	300	220	280	400	7075.55	0	9.76603
555.554	1520	5000	180	300	220	280	400	7075.55	0	9.08766
555.554	1520	5000	180	300	220	280	400	7075.55	0	8.29962
555.554	1520	5000	180	300	220	280	400	7075.55	0	9.47148
555.554	1520	5000	180	300	220	280	400	7075.55	0	8.11781
555.554	1520	5000	180	300	220	280	400	7075.55	0	9.05108
100	1680	5500	120.319	280	275.354	240	380	7280	0	8.24935
357.142	1260	5500	160	280	240	280	380	7117.14	0	9.63959
357.142	1260	5500	160	280	240	280	380	7117.14	0	8.54311
555.554	1520	5000	180	300	220	280	400	7075.55	0	8.51734
555.554	1520	5000	180	300	220	280	400	7075.55	0	8.73324
555.554	1520	5000	180	300	220	280	400	7075.55	0	9.40171
555.554	1520	5000	180	300	220	280	400	7075.55	0	8.51786
357.142	1260	5500	160	280	240	280	380	7117.14	0	8.94991
555.554	1520	5000	180	300	220	280	400	7075.55	0	8.78933
555.554	1520	5000	180	300	220	280	400	7075.55	0	9.65889
555.554	1520	5000	180	300	220	280	400	7075.55	0	8.72382
555.554	1520	5000	180	300	220	280	400	7075.55	0	8.48
555.554	1520	5000	180	300	220	280	400	7075.55	0	7.89629
555.554	1520	5000	180	300	220	280	400	7075.55	0	8.30783
555.554	1520	5000	180	300	220	280	400	7075.55	0	8.45008
555.554	1520	5000	180	300	220	280	400	7075.55	0	9.29064
555.554	1520	5000	180	300	220	280	400	7075.55	0	8.45691

## Sheet: f9
277.777	1000	6250	150	250	250	300	350	7527.78	0	8.23718
277.777	1900	5000	150	300	250	250	400	7177.78	0	8.36948
833.332	1250	5000	200	300	200	300	400	7083.33	0	8.32641
277.777	1900	5000	150	300	250	250	400	7177.78	0	7.28656
833.332	1250	5000	200	300	200	300	400	7083.33	0	8.25786
833.332	1250	5000	200	300	200	300	400	7083.33	0	8.96603
277.777	1900	5000	150	300	250	250	400	7177.78	0	8.60409
833.332	1250	5000	200	300	200	300	400	7083.33	0	8.66199
833.332	1250	5000	200	300	200	300	400	7083.33	0	7.89749
277.777	1900	5000	150	300	250	250	400	7177.78	0	8.48854
833.332	1300	5000	200	300	200	300	400	7133.33	0	8.56082
833.332	1250	5000	200	300	200	300	400	7083.33	0	9.16395
100	1250	6250	111.176	250	243.147	250	350	7600	0	8.53431
833.332	1250	5000	200	300	200	300	400	7083.33	0	7.33342
833.332	1250	5000	200	300	200	300	400	7083.33	0	8.51585
277.777	1900	5000	150	300	250	250	400	7177.78	0	7.65008
277.777	1900	5000	150	300	250	250	400	7177.78	0	7.63045
833.332	1250	5000	200	300	200	300	400	7083.33	0	7.81205
277.777	1900	5000	150	300	250	250	400	7177.78	0	7.75847
277.777	1900	5000	150	300	250	250	400	7177.78	0	7.70236
277.777	1900	5000	150	300	250	250	400	7177.78	0	7.36275
277.777	1900	5000	150	300	250	250	400	7177.78	0	7.64416
833.332	1250	5000	200	300	200	300	400	7083.33	0	7.12694
833.332	1250	5000	200	300	200	300	400	7083.33	0	7.16455
833.332	1250	5000	200	300	200	300	400	7083.33	0	8.60895
837.908	1250	5008.07	200.139	300	199.631	300	399.998	7095.98	0	8.52652
833.332	1250	5000	200	300	200	300	400	7083.33	0	8.80944
833.332	1250	5000	200	300	200	300	400	7083.33	0	8.92266
846.491	1250	5015.36	200.424	300	199.175	300	399.795	7111.85	0	8.48701
833.332	1250	5000	200	300	200	300	400	7083.33	0	8.42173

## Sheet: f10
833.332	1300	5000	200	300	200	300	400	7133.33	0	7.17013
100	2600	5000	105.914	300	219.69	200	400	7700	0	8.24254
100	2600	5000	103.748	300	173.333	200	400	7700	0	8.01097
100	2600	5000	106.158	300	179.707	200	400	7700	0	6.45119
100	2600	5000	103.723	300	281.535	200	400	7700	0	6.4708
100	2600	5000	101.281	300	180.549	200	400	7700	0	7.08073
833.332	1300	5000	200	300	200	300	400	7133.33	0	6.97212
100	2600	5000	103.392	300	215.733	200	400	7700	0	6.46804
100	2600	5000	101.924	300	281.054	200	400	7700	0	6.59523
833.332	1300	5000	200	300	200	300	400	7133.33	0	8.71614
100	2600	5000	105.796	300	215.751	200	400	7700	0	8.09695
833.332	1300	5000	200	300	200	300	400	7133.33	0	6.22943
833.332	1300	5000	200	300	200	300	400	7133.33	0	7.02174
100	2600	5000	100.031	300	198.231	200	400	7700	0	7.6059
833.332	1300	5000	200	300	200	300	400	7133.33	0	8.31246
100	2600	5000	102.931	300	255.615	200	400	7700	0	7.06874
100	1300	7500	22.4028	200	108.5	200	300	8900	0	7.38538
833.332	1300	5000	200	300	200	300	400	7133.33	0	8.38525
833.332	1300	5000	200	300	200	300	400	7133.33	0	6.80957
100	2600	5000	100.187	300	197.999	200	400	7700	0	7.50351
100	2600	5000	106.867	300	283.893	200	400	7700	0	8.09578
833.332	1300	5000	200	300	200	300	400	7133.33	0	7.76109
833.332	1300	5000	200	300	200	300	400	7133.33	0	8.08884
833.332	1300	5000	200	300	200	300	400	7133.33	0	6.85819
833.332	1300	5000	200	300	200	300	400	7133.33	0	8.17551
100	2600	5000	100.464	300	118.379	200	400	7700	0	6.3407
833.332	1300	5000	200	300	200	300	400	7133.33	0	7.60837
833.332	1300	5000	200	300	200	300	400	7133.33	0	5.57759
833.332	1300	5000	200	300	200	300	400	7133.33	0	7.84571
833.332	1300	5000	200	300	200	300	400	7133.33	0	6.47695

[truncated: 18 more sheets: f11, f12, f13, f14, f15, f16, f17, f18, f19, f20, f21, f22, f23, f24, f25, f26, f27, f28]
