# Supplementary material for: Efficiently handling constraints in mixed-integer nonlinear programming problems using gradient-based repair differential evolution
Source: PeerJ journal article supplement (doi:10.7717/peerj-cs.2095), 2024-05-31
Supplement: Supplemental_File_2.zip [file CJADE_CaR.xlsx]

## Sheet: f1
-1	0	13	0	5.31259
-1	0	13	0	5.23305
-1	0	13	0	5.41896
-1	0	13	0	5.5554
-1	0	13	0	5.42975
-1	0	13	0	5.18784
-1	0	13	0	5.23293
-1	0	13	0	4.84432
-1	0	13	0	5.40255
-1	0	13	0	5.42723
-1	0	13	0	5.14573
-1	0	13	0	5.18515
-1	0	13	0	4.94513
-1	0	13	0	5.22566
-1	0	13	0	5.30872
-1	0	13	0	5.10217
-1	0	13	0	5.30412
-1	0	13	0	4.85867
-1	0	13	0	5.33121
-1	0	13	0	5.21006
-1	0	13	0	5.17703
-1	0	13	0	5.14275
-1	0	13	0	5.18506
-1	0	13	0	5.53354
-1	0	13	0	5.37156
-1	0	13	0	5.28143
-1	0	13	0	5.21783
-1	0	13	0	5.04397
-1	0	13	0	4.2239
-1	0	13	0	5.60664

## Sheet: f2
9.31423e-09	1	1	1	0	6.11966
8.46324e-10	1	1	1	0	6.16272
2.46714e-09	1	1	1	0	6.24528
-6.92389e-09	1	1	1	0	6.03125
-7.5247e-09	1	1	1	0	6.05571
3.66415e-09	1	1	1	0	6.26329
7.90668e-09	1	1	1	0	6.08222
-7.84575e-09	1	1	1	0	6.07561
1.32984e-09	1	1	1	0	6.16431
3.08728e-10	1	1	1	0	6.38969
-6.82646e-09	1	1	1	0	6.63392
1.56582e-09	1	1	1	0	6.06017
-1.02486e-08	1	1	1	0	6.37174
9.90595e-09	1	1	1	0	6.06742
5.05018e-10	1	1	1	0	6.29675
4.8345e-09	1	1	1	0	6.1259
-9.35448e-09	1	1	1	0	6.08623
5.67307e-09	1	1	1	0	6.685
-5.30704e-09	1	1	1	0	6.19759
-8.66583e-09	1	1	1	0	6.00279
-7.19442e-09	1	1	1	0	6.1998
-9.16725e-09	1	1	1	0	6.02411
4.60678e-09	1	1	1	0	6.18475
-1.58812e-10	1	1	1	0	6.26606
3.02e-09	1	1	1	0	5.99153
1.4383e-09	1	1	1	0	6.05139
-6.75713e-09	1	1	1	0	6.07996
-5.38998e-09	1	1	1	0	6.06212
-2.81091e-09	1	1	1	0	6.1937
1.03773e-08	1	1	1	0	6.80883

## Sheet: f3
1	3	-4	0	5.64916
1	3	-4	0	5.69336
1	3	-4	0	5.69953
1	3	-4	0	5.80537
1	3	-4	0	5.93639
1	3	-4	0	5.62624
1	3	-4	0	5.79451
1	3	-4	0	5.79229
1	3	-4	0	5.78549
1	3	-4	0	5.85789
1	3	-4	0	5.67244
1	3	-4	0	5.78051
1	3	-4	0	5.63517
1	3	-4	0	5.84931
1	3	-4	0	5.67741
1	3	-4	0	5.66107
1	3	-4	0	5.7852
1	3	-4	0	5.87387
1	3	-4	0	5.68738
1	3	-4	0	5.83357
1	3	-4	0	5.70319
1	3	-4	0	5.61392
1	3	-4	0	5.68172
1	3	-4	0	5.71855
1	3	-4	0	5.78109
1	3	-4	0	5.82756
1	3	-4	0	5.64128
1	3	-4	0	5.8
1	3	-4	0	6.00646
1	3	-4	0	5.80576

## Sheet: f4
3	3	-6	0	5.7271
3	3	-6	0	5.68617
3	3	-6	0	5.69106
3	3	-6	0	5.82238
3	3	-6	0	6.18692
3	3	-6	0	5.69948
3	3	-6	0	5.85027
3	3	-6	0	5.66827
3	3	-6	0	5.7361
3	3	-6	0	5.70116
3	3	-6	0	5.60513
3	3	-6	0	5.91361
3	3	-6	0	5.91196
3	3	-6	0	5.70726
3	3	-6	0	6.07763
3	3	-6	0	5.85555
3	3	-6	0	5.6159
3	3	-6	0	5.84833
3	3	-6	0	5.68997
3	3	-6	0	5.88711
3	3	-6	0	5.63405
3	3	-6	0	5.70957
3	3	-6	0	5.64075
3	3	-6	0	5.65069
3	3	-6	0	5.67913
3	3	-6	0	5.9177
3	3	-6	0	5.66269
3	3	-6	0	5.89305
3	3	-6	0	5.62766
3	3	-6	0	5.88176

## Sheet: f5
0.99995	1	0.24995	0	5.78168
0.99995	1	0.24995	0	6.06823
0.99995	1	0.24995	0	5.65929
0.99995	1	0.24995	0	5.62104
0.99995	1	0.24995	0	5.60717
0.99995	1	0.24995	0	5.60755
0.99995	1	0.24995	0	5.86713
0.99995	1	0.24995	0	5.8092
0.99995	1	0.24995	0	5.68865
0.99995	1	0.24995	0	5.66453
0.99995	1	0.24995	0	5.76906
0.99995	1	0.24995	0	5.64332
0.99995	1	0.24995	0	5.56747
0.99995	1	0.24995	0	5.76588
0.99995	1	0.24995	0	5.69504
0.99995	1	0.24995	0	5.74101
0.99995	1	0.24995	0	5.58837
0.99995	1	0.24995	0	5.495
0.99995	1	0.24995	0	5.62057
0.99995	1	0.24995	0	5.62032
0.99995	1	0.24995	0	5.66219
0.99995	1	0.24995	0	5.68462
0.99995	1	0.24995	0	5.58365
0.99995	1	0.24995	0	5.6785
0.99995	1	0.24995	0	5.57129
0.99995	1	0.24995	0	5.56383
0.99995	1	0.24995	0	5.91204
0.99995	1	0.24995	0	5.61633
0.99995	1	0.24995	0	5.74457
0.99995	1	0.24995	0	5.69583

## Sheet: f6
14.225	1	-6783.58	0	5.75557
14.225	1	-6783.58	0	5.95807
14.225	1	-6783.58	0	5.74245
14.225	1	-6783.58	0	5.7131
14.225	1	-6783.58	0	5.90539
14.225	1	-6783.58	0	5.76456
14.225	1	-6783.58	0	5.83171
14.225	1	-6783.58	0	5.76244
14.225	1	-6783.58	0	5.96884
14.225	1	-6783.58	0	5.80528
14.225	1	-6783.58	0	5.79899
14.225	1	-6783.58	0	5.8611
14.225	1	-6783.58	0	5.76249
14.225	1	-6783.58	0	6.04215
14.225	1	-6783.58	0	5.72459
14.225	1	-6783.58	0	5.85419
14.225	1	-6783.58	0	5.89961
14.225	1	-6783.58	0	5.75187
14.225	1	-6783.58	0	5.93759
14.225	1	-6783.58	0	5.79529
14.225	1	-6783.58	0	5.98651
14.225	1	-6783.58	0	5.81936
14.225	1	-6783.58	0	6.06099
14.225	1	-6783.58	0	5.77581
14.225	1	-6783.58	0	5.73776
14.225	1	-6783.58	0	5.73664
14.225	1	-6783.58	0	5.9641
14.225	1	-6783.58	0	5.99689
14.225	1	-6783.58	0	5.88703
14.225	1	-6783.58	0	5.77707

## Sheet: f7
-0.0464159	-2.77314	-0.554648	-1	-1	0.931096	0	5.98918
-0.0464159	-2.77314	0.554648	-1	1	0.931096	0	5.65146
-0.0464159	-2.77314	-0.554648	-1	-1	0.931096	0	4.54128
-0.0464159	2.77314	-0.554648	-1	1	0.931096	0	4.51198
-0.0464159	2.77314	-0.554648	-1	1	0.931096	0	4.83663
-0.0464159	2.77314	-0.554648	-1	1	0.931096	0	5.73784
-0.0464159	-2.77314	0.554648	-1	1	0.931096	0	5.53619
-0.0464159	-2.77314	0.554648	-1	1	0.931096	0	5.76463
-0.0464159	-2.77314	0.554648	-1	1	0.931096	0	5.73716
-0.0464159	2.77314	-0.554648	-1	1	0.931096	0	6.25363
-0.0464159	-2.77314	0.554648	-1	1	0.931096	0	4.69222
-0.0464159	-2.77314	0.554648	-1	1	0.931096	0	5.29605
-0.0464159	-2.77314	-0.554648	-1	-1	0.931096	0	6.14513
-0.0464159	-2.77314	-0.554648	-1	-1	0.931096	0	5.96073
-0.0464159	2.77314	-0.554648	-1	1	0.931096	0	5.75165
-0.0429187	-2.77318	-0.554627	-1	-1	0.936119	0	5.27788
-0.0464159	-2.22451	0.222461	-1	2	0.9551	0	4.57617
-0.0464159	2.22451	-0.222461	-1	2	0.9551	0	5.67615
-0.0464159	2.22451	0.222461	-1	-2	0.9551	0	5.94822
-0.00578512	-0.00813823	0.000549215	-1	3	1	0	6.38368
-0.00578508	-0.00813825	0.000549217	-1	3	1	0	5.82869
-0.00578512	0.00813823	-0.000549215	-1	3	1	0	6.23362
-0.00578518	0.00813819	-0.000549212	-1	3	1	0	5.67004
-0.00578507	-0.00813826	-0.000549217	-1	-3	1	0	3.93433
-0.00578512	0.00813823	-0.000549215	-1	3	1	0	6.12548
-0.00578521	0.00813816	0.000549211	-1	-3	1	0	6.09614
-0.00578505	-0.00813828	0.000549219	-1	3	1	0	6.03157
-0.00578516	0.0081382	0.000549213	-1	-3	1	0	5.90019
-0.00578514	-0.00813821	-0.000549214	-1	-3	1	0	5.78386
-0.00578504	0.00813829	-0.000549219	-1	3	1	0	4.8302

## Sheet: f8
555.554	5000	180	220	400	26	15	14	7055.55	0	4.58923
555.554	5000	180	220	400	26	15	14	7055.55	0	4.28592
555.554	5000	180	220	400	26	15	14	7055.55	0	4.37697
555.554	5000	180	220	400	26	15	14	7055.55	0	3.87326
555.554	5000	180	220	400	26	15	14	7055.55	0	3.85375
555.554	5000	180	220	400	26	15	14	7055.55	0	3.82836
555.554	5000	180	220	400	26	15	14	7055.55	0	3.51183
555.554	5000	180	220	400	26	15	14	7055.55	0	3.43042
555.554	5000	180	220	400	26	15	14	7055.55	0	3.49181
555.554	5000	180	220	400	26	15	14	7055.55	0	3.54766
555.554	5000	180	220	400	26	15	14	7055.55	0	3.6786
555.554	5000	180	220	400	26	15	14	7055.55	0	3.31832
555.554	5000	180	220	400	26	15	14	7055.55	0	3.34087
555.554	5000	180	220	400	26	15	14	7055.55	0	3.48545
555.554	5000	180	220	400	26	15	14	7055.55	0	3.78927
555.554	5000	180	220	400	26	15	14	7055.55	0	3.89857
555.554	5000	180	220	400	26	15	14	7055.55	0	3.84797
555.554	5000	180	220	400	26	15	14	7055.55	0	3.51377
555.554	5000	180	220	400	26	15	14	7055.55	0	3.63082
555.554	5000	180	220	400	26	15	14	7055.55	0	3.72826
555.554	5000	180	220	400	26	15	14	7055.55	0	3.27985
555.554	5000	180	220	400	26	15	14	7055.55	0	3.9248
555.554	5000	180	220	400	26	15	14	7055.55	0	3.72206
555.554	5000	180	220	400	26	15	14	7055.55	0	3.82564
555.554	5000	180	220	400	26	15	14	7055.55	0	4.04951
556.512	5000.2	180.067	219.907	399.999	27	15	14	7076.72	0	3.6158
557.104	5001.1	180.056	219.815	399.988	27	15	14	7078.21	0	3.44352
558.6	5003.36	180.209	219.722	399.972	27	15	14	7081.96	0	3.46603
833.332	5000	200	200	400	14	15	15	7093.33	0	3.70812
833.332	5000	200	200	400	14	15	15	7093.33	0	4.17459

## Sheet: f9
833.332	5000	200	200	400	6	6	6	7083.33	0	4.45763
833.332	5000	200	200	400	6	6	6	7083.33	0	4.42959
833.332	5000	200	200	400	6	6	6	7083.33	0	4.70987
833.332	5000	200	200	400	6	6	6	7083.33	0	4.5287
833.332	5000	200	200	400	6	6	6	7083.33	0	4.41136
833.332	5000	200	200	400	6	6	6	7083.33	0	3.64835
833.332	5000	200	200	400	6	6	6	7083.33	0	3.49904
833.332	5000	200	200	400	6	6	6	7083.33	0	3.38126
833.332	5000	200	200	400	6	6	6	7083.33	0	3.39411
833.332	5000	200	200	400	6	6	6	7083.33	0	3.66908
833.332	5000	200	200	400	6	6	6	7083.33	0	3.86061
833.332	5000	200	200	400	6	6	6	7083.33	0	3.94533
833.332	5000	200	200	400	6	6	6	7083.33	0	4.45582
833.332	5000	200	200	400	6	6	6	7083.33	0	3.9302
833.332	5000	200	200	400	6	6	6	7083.33	0	4.11205
833.418	5000.05	200.003	199.992	400	6	6	6	7083.47	0	4.06755
840.547	5002.6	200.132	199.774	399.963	6	6	6	7093.14	0	4.34037
277.777	5000	150	250	400	19	6	5	7177.78	0	4.40601
277.777	5000	150	250	400	19	6	5	7177.78	0	5.03959
277.777	5000	150	250	400	19	6	5	7177.78	0	3.63656
277.777	5000	150	250	400	19	6	5	7177.78	0	4.16268
277.777	5000	150	250	400	19	6	5	7177.78	0	3.7791
277.777	5000	150	250	400	19	6	5	7177.78	0	4.07933
277.777	5000	150	250	400	19	6	5	7177.78	0	4.35432
277.777	5000	150	250	400	19	6	5	7177.78	0	4.49129
277.777	5000	150	250	400	19	6	5	7177.78	0	4.35054
277.777	5000	150	250	400	19	6	5	7177.78	0	4.49671
277.777	5000	150	250	400	19	6	5	7177.78	0	4.5861
277.777	5000	150	250	400	19	6	5	7177.78	0	4.81252
277.777	5000	150	250	400	19	6	5	7177.78	0	4.63879

## Sheet: f10
833.332	5000	200	200	400	4	3	3	7133.33	0	5.04549
833.332	5000	200	200	400	4	3	3	7133.33	0	4.63072
833.332	5000	200	200	400	4	3	3	7133.33	0	4.47048
833.332	5000	200	200	400	4	3	3	7133.33	0	4.51321
833.332	5000	200	200	400	4	3	3	7133.33	0	4.32153
833.332	5000	200	200	400	4	3	3	7133.33	0	3.94526
833.332	5000	200	200	400	4	3	3	7133.33	0	4.12813
833.332	5000	200	200	400	4	3	3	7133.33	0	4.68361
833.332	5000	200	200	400	4	3	3	7133.33	0	3.81992
833.332	5000	200	200	400	4	3	3	7133.33	0	4.13467
833.332	5000	200	200	400	4	3	3	7133.33	0	4.39174
833.332	5000	200	200	400	4	3	3	7133.33	0	4.46058
833.332	5000	200	200	400	4	3	3	7133.33	0	4.23387
833.332	5000	200	200	400	4	3	3	7133.33	0	4.20985
833.332	5000	200	200	400	4	3	3	7133.33	0	3.97784
833.332	5000	200	200	400	4	3	3	7133.33	0	4.03931
833.332	5000	200	200	400	4	3	3	7133.33	0	4.45025
833.332	5000	200	200	400	4	3	3	7133.33	0	4.04247
833.332	5000	200	200	400	4	3	3	7133.33	0	4.41813
833.332	5000	200	200	400	4	3	3	7133.33	0	4.20586
833.332	5000	200	200	400	4	3	3	7133.33	0	4.72613
833.332	5000	200	200	400	4	3	3	7133.33	0	4.85224
833.552	5000.24	200.004	199.987	400	4	3	3	7133.79	0	4.81654
834.194	5000.34	200.005	199.956	399.999	4	3	3	7134.53	0	4.95003
834.198	5000.74	200.012	199.967	399.995	4	3	3	7134.94	0	4.72246
835.987	5001.27	200.024	199.798	399.982	4	3	3	7137.26	0	5.20222
851.148	5000.43	200.667	198.648	399.997	4	3	3	7151.58	0	4.36215
100	5000	100	204.517	400	16	3	2	7600	0	5.13556
100	5000	100	227.917	400	16	3	2	7600	0	4.5682
100	5000	100	289.026	400	16	3	2	7600	0	4.52841

[truncated: 18 more sheets: f11, f12, f13, f14, f15, f16, f17, f18, f19, f20, f21, f22, f23, f24, f25, f26, f27, f28]
