# Supplementary material for: Efficiently handling constraints in mixed-integer nonlinear programming problems using gradient-based repair differential evolution
Source: PeerJ journal article supplement (doi:10.7717/peerj-cs.2095), 2024-05-31
Supplement: Supplemental_File_2.zip [file CJADE_CaR_SOP.xls]

## Sheet: Hoja1
Execution	t1	t2	t3	t4	t5	t6	t7	w1	w2	w3	w4	w5	w6	f(x)	G(x)	Time execution
1	4.05577	6.35643	20.6928	31.1418	34.3104	35.1134	57.4516	2	2	1	4	3	1	1.57997	1.21249	191.977
2	3.14672	25.042	25.3675	27.6786	28.0999	40.5228	57.1935	2	4	4	2	3	1	1.74842	1.02797	186.815
3	2.82279	13.306	16.7388	17.6692	36.1766	41.108	57.9982	2	2	2	3	3	1	1.38039	5.1144	182.734
4	2.46443	15.0963	25.1898	28.9155	39.0773	46.826	58.7292	2	2	4	1	1	3	1.76594	2.51211	177.087
5	3.98708	6.75065	12.7131	27.9673	31.9873	49.8151	57.1136	2	2	2	4	1	3	1.82657	0.203961	177.697
6	4.10909	15.5775	24.5433	29.0184	35.3712	38.0161	57.9009	2	2	2	4	2	1	2.14452	2.7548	176.089
7	2.77027	17.3958	33.0689	33.5115	38.8799	57.4586	57.6325	2	3	1	3	1	4	1.37886	5.53253	177.053
8	2.80135	14.1065	28.2879	32.432	38.6511	49.4754	59.4395	2	2	4	3	1	3	1.84732	3.44747	177.825
9	4.50461	18.9812	22.499	31.9673	34.1442	56.7913	57.5748	2	2	3	4	1	4	1.58595	0.50892	179.809
10	2.85303	16.1558	26.0058	29.5585	42.0901	43.6621	58.8904	2	2	4	1	3	3	1.74529	4.03544	176.236
11	2.75485	11.7303	16.0962	19.8819	27.3428	39.9014	58.1487	2	2	1	3	3	1	1.32901	5.46955	178.614
12	3.52478	4.22187	17.7023	25.0748	33.9255	35.5049	58.1862	1	2	1	3	4	1	1.40352	4.947	175.141
13	5.47035	21.7962	21.8343	29.7173	33.7876	34.9262	56.4935	2	2	2	4	3	1	1.87276	0.63239	178.604
14	3.53206	6.07443	28.2415	31.8338	36.7301	51.6809	56.3616	2	2	4	3	1	3	1.83636	0.12855	178.618
15	2.53028	18.1191	36.0494	37.4219	40.6217	52.5981	57.5126	2	3	3	3	1	3	1.38106	3.49537	178.975
16	3.00644	23.7558	26.3128	27.5012	30.8852	47.6307	57.9779	2	1	3	4	1	3	1.68382	0.147772	180.029
17	2.88709	20.6272	27.9488	31.7842	37.0287	47.7034	56.3621	2	2	4	3	1	1	1.88599	0.00727626	179.279
18	5.05609	21.4741	29.9201	34.2453	40.4875	46.8112	58.5163	2	2	4	1	1	3	1.83632	0.88819	180.772
19	2.54624	3.01145	26.043	28.6855	35.7134	45.8994	58.826	3	2	4	3	3	1	1.75616	6.12462	180.161
20	2.85398	28.4299	33.2793	33.307	43.6441	45.7325	57.9408	2	4	3	1	2	3	1.99482	0.689457	180.848
21	4.80723	18.596	26.7989	29.3203	32.8241	56.1908	57.7181	2	2	3	4	1	4	1.78098	2.16979	181.794
22	3.11112	9.57394	26.106	30.2264	43.3993	53.9659	57.8063	2	2	4	1	1	3	1.8259	1.57986	180.833
23	2.93007	5.30187	7.1527	22.6855	31.0375	33.9925	56.7648	2	3	2	1	4	1	1.63114	2.03154	182.559
24	4.3888	17.0682	27.4791	34.1795	35.4444	56.9644	59.4542	2	1	3	4	1	4	1.36475	6.19748	180.658
25	7.93967	29.7553	30.9673	34.4949	49.9916	58.7612	62.7157	2	3	4	1	3	4	1.73428	7.01101	182.881
26	3.69447	20.6473	24.0735	28.3323	31.5474	48.0133	59.1554	2	2	3	4	1	3	1.65504	3.90725	182.835
27	4.3285	18.8244	26.3892	36.8253	41.476	57.9117	58.8161	2	3	3	3	1	4	1.3664	6.96689	181.577
28	4.68132	26.5728	30.1839	35.26	39.2219	42.3398	57.5952	2	1	4	3	2	1	2.00417	2.57912	184.298
29	4.56321	23.3093	29.9258	33.0593	33.1771	48.4598	58.0506	2	1	4	4	1	3	1.60606	0.773376	184.053
30	3.37174	23.5825	27.3713	28.7983	31.1687	47.0112	58.273	2	1	3	4	3	1	1.63319	4.16937	183.164
