# Supplementary material for: Efficiently handling constraints in mixed-integer nonlinear programming problems using gradient-based repair differential evolution
Source: PeerJ journal article supplement (doi:10.7717/peerj-cs.2095), 2024-05-31
Supplement: Supplemental_File_2.zip [file DE_CaR_S.xlsx]

## Sheet: f1
-1	0	13	0	11.1174
-1	0	13	0	10.8108
-1	0	13	0	11.6074
-1	0	13	0	10.9329
-1	0	13	0	10.7612
-1	0	13	0	11.2967
-1	0	13	0	10.86
-1	0	13	0	11.0607
-1	0	13	0	10.8825
-1	0	13	0	11.1684
-1	0	13	0	13.3067
-1	0	13	0	11.3099
-1	0	13	0	11.0404
-1	0	13	0	10.7916
-1	0	13	0	12.4753
-1	0	13	0	18.3804
-1	0	13	0	11.1704
-1	0	13	0	10.9561
-1	0	13	0	14.0477
-1	0	13	0	10.8589
-1	0	13	0	10.8523
-1	0	13	0	10.9043
-1	0	13	0	13.1037
-1	0	13	0	10.9038
-1	0	13	0	11.3799
-1	0	13	0	11.6072
-1	0	13	0	11.4239
-1	0	13	0	10.7696
-1	0	13	0	11.0104
-1	0	13	0	11.114

## Sheet: f2
-3.63517e-10	1	1	1	0	15.2723
-5.66138e-09	1	1	1	0	15.2796
-5.4567e-09	1	1	1	0	14.9053
-8.84139e-09	1	1	1	0	15.2048
2.34713e-09	1	1	1	0	14.9515
-3.60184e-10	1	1	1	0	15.1109
-6.99615e-09	1	1	1	0	15.4028
3.72401e-09	1	1	1	0	12.5623
-2.86972e-09	1	1	1	0	15.0604
1.15811e-09	1	1	1	0	14.8076
8.42143e-09	1	1	1	0	15.1288
1.39418e-09	1	1	1	0	15.0735
4.02178e-10	1	1	1	0	15.4164
1.04036e-08	1	1	1	0	15.1585
4.97909e-09	1	1	1	0	14.8738
-2.69795e-09	1	1	1	0	14.8254
4.92506e-09	1	1	1	0	14.7772
6.0177e-09	1	1	1	0	15.3847
-4.31238e-09	1	1	1	0	14.9763
7.41748e-11	1	1	1	0	14.7655
-2.89891e-09	1	1	1	0	11.364
-4.8889e-09	1	1	1	0	15.2464
9.47048e-10	1	1	1	0	15.2017
-1.52857e-09	1	1	1	0	14.8897
2.19709e-09	1	1	1	0	15.1654
-7.27737e-09	1	1	1	0	14.8033
3.55203e-09	1	1	1	0	15.1719
1.7343e-09	1	1	1	0	15.0343
8.75844e-10	1	1	1	0	16.3345
6.86615e-10	1	1	1	0	14.7555

## Sheet: f3
1	3	-4	0	14.8222
1	3	-4	0	16.0075
1	3	-4	0	14.7367
1	3	-4	0	15.4515
1	3	-4	0	15.0564
1	3	-4	0	14.8724
1	3	-4	0	14.9036
1	3	-4	0	14.8717
1	3	-4	0	14.7807
1	3	-4	0	15.3769
1	3	-4	0	15.2512
1	3	-4	0	14.7401
1	3	-4	0	14.8404
1	3	-4	0	15.8506
1	3	-4	0	15.449
1	3	-4	0	15.1769
1	3	-4	0	14.7461
1	3	-4	0	15.0283
1	3	-4	0	15.1759
1	3	-4	0	15.3345
1	3	-4	0	14.9506
1	3	-4	0	14.7274
1	3	-4	0	14.9776
1	3	-4	0	15.0527
1	3	-4	0	15.4893
1	3	-4	0	15.701
1	3	-4	0	14.7592
1	3	-4	0	15.2069
1	3	-4	0	15.9971
1	3	-4	0	15.2873

## Sheet: f4
3	3	-6	0	16.8914
3	3	-6	0	16.4665
3	3	-6	0	16.9299
3	3	-6	0	17.1407
3	3	-6	0	16.7102
3	3	-6	0	16.7748
3	3	-6	0	17.1504
3	3	-6	0	16.8125
3	3	-6	0	16.9244
3	3	-6	0	16.7174
3	3	-6	0	17.0196
3	3	-6	0	16.8646
3	3	-6	0	16.8129
3	3	-6	0	16.6604
3	3	-6	0	16.9823
3	3	-6	0	17.5247
3	3	-6	0	17.0257
3	3	-6	0	16.594
3	3	-6	0	16.5769
3	3	-6	0	17.065
3	3	-6	0	16.6902
3	3	-6	0	17.5426
3	3	-6	0	16.7341
3	3	-6	0	16.7899
3	3	-6	0	16.4488
3	3	-6	0	16.6447
3	3	-6	0	17.3911
3	3	-6	0	16.7961
3	3	-6	0	16.8418
3	3	-6	0	16.7579

## Sheet: f5
0.99995	1	0.24995	0	14.6451
0.99995	1	0.24995	0	15.273
0.99995	1	0.24995	0	14.9709
0.99995	1	0.24995	0	14.4837
0.99995	1	0.24995	0	14.3227
0.99995	1	0.24995	0	14.5405
0.99995	1	0.24995	0	14.8401
0.99995	1	0.24995	0	14.7344
0.99995	1	0.24995	0	14.4041
0.99995	1	0.24995	0	15.0865
0.99995	1	0.24995	0	14.9865
0.99995	1	0.24995	0	15.0444
0.99995	1	0.24995	0	14.7376
0.99995	1	0.24995	0	14.5109
0.99995	1	0.24995	0	14.3527
0.99995	1	0.24995	0	14.5385
0.99995	1	0.24995	0	15.2704
0.99995	1	0.24995	0	14.43
0.99995	1	0.24995	0	15.2471
0.99995	1	0.24995	0	14.5698
0.99995	1	0.24995	0	15.2824
0.99995	1	0.24995	0	14.6494
0.99995	1	0.24995	0	14.7587
0.99995	1	0.24995	0	14.6104
0.99995	1	0.24995	0	14.6581
0.99995	1	0.24995	0	14.4068
0.99995	1	0.24995	0	14.8211
0.99995	1	0.24995	0	14.512
0.99995	1	0.24995	0	14.6608
0.99995	1	0.24995	0	14.6149

## Sheet: f6
14.225	1	-6783.58	0	17.1028
14.225	1	-6783.58	0	16.739
14.225	1	-6783.58	0	16.8056
14.225	1	-6783.58	0	17.0107
14.225	1	-6783.58	0	16.7421
14.225	1	-6783.58	0	16.4833
14.225	1	-6783.58	0	16.3492
14.225	1	-6783.58	0	16.5572
14.225	1	-6783.58	0	16.5989
14.225	1	-6783.58	0	16.4717
14.225	1	-6783.58	0	16.3518
14.225	1	-6783.58	0	16.7604
14.225	1	-6783.58	0	16.4685
14.225	1	-6783.58	0	16.6258
14.225	1	-6783.58	0	16.939
14.225	1	-6783.58	0	16.6894
14.225	1	-6783.58	0	17.3057
14.225	1	-6783.58	0	16.4442
14.225	1	-6783.58	0	16.7155
14.225	1	-6783.58	0	16.5806
14.225	1	-6783.58	0	16.4559
14.225	1	-6783.58	0	16.4722
14.225	1	-6783.58	0	16.8175
14.225	1	-6783.58	0	16.6894
14.225	1	-6783.58	0	16.4365
14.225	1	-6783.58	0	16.5553
14.225	1	-6783.58	0	16.7397
14.225	1	-6783.58	0	16.5409
14.225	1	-6783.58	0	16.5208
14.225	1	-6783.58	0	16.4102

## Sheet: f7
-1.25994	-2.48314	0.496648	1	-1	0.211439	0	15.8654
-1.25994	2.48314	0.496648	1	1	0.211439	0	15.9168
-1.25994	2.48314	0.496648	1	1	0.211439	0	16.3428
-1.25994	2.48314	-0.496648	1	-1	0.211439	0	15.7297
-1.25994	2.48314	0.496648	1	1	0.211439	0	16.1163
-1.25994	-2.48314	0.496648	1	-1	0.211439	0	15.8253
-1.25994	2.48314	0.496648	1	1	0.211439	0	16.4199
-1.25994	-2.48314	-0.496648	1	1	0.211439	0	15.7054
-1.25994	-2.48314	-0.496648	1	1	0.211439	0	15.5016
-1.25994	2.48314	-0.496648	1	-1	0.211439	0	15.3896
-1.25994	-2.48314	0.496648	1	-1	0.211439	0	15.6194
-1.25994	-2.48314	-0.496648	1	1	0.211439	0	15.815
-1.25994	-2.48314	0.496648	1	-1	0.211439	0	15.7597
-1.25994	2.48314	-0.496648	1	-1	0.211439	0	15.8301
-1.25994	2.48314	0.496648	1	1	0.211439	0	15.9826
-1.25994	-2.48314	0.496648	1	-1	0.211439	0	16.0795
-1.25994	2.48314	-0.496648	1	-1	0.211439	0	15.9482
-1.25994	-2.48314	0.496648	1	-1	0.211439	0	15.7906
-1.25994	-2.48314	-0.496648	1	1	0.211439	0	15.9376
-1.25994	2.48314	-0.496648	1	-1	0.211439	0	16.115
-1.25994	-2.48314	-0.496648	1	1	0.211439	0	15.8909
-1.25994	-2.48314	-0.496648	1	1	0.211439	0	15.6287
-1.25994	2.48314	0.496648	1	1	0.211439	0	15.9025
-1.25994	-2.48314	0.496648	1	-1	0.211439	0	16.3523
-1.25994	-2.48314	-0.496648	1	1	0.211439	0	16.0646
-1.25994	-2.48314	-0.496648	1	1	0.211439	0	16.8372
-1.25994	2.48314	0.496648	1	1	0.211439	0	16.3643
-0.0464159	-2.77314	0.554648	-1	1	0.931096	0	16.8012
-0.0464159	2.77314	-0.554648	-1	1	0.931096	0	16.5736
-0.0464159	2.77314	-0.554648	-1	1	0.931096	0	16.7241

## Sheet: f8
555.554	5000	180	220	400	26	15	14	7055.55	0	21.126
555.554	5000	180	220	400	26	15	14	7055.55	0	21.7165
555.554	5000	180	220	400	26	15	14	7055.55	0	25.0175
555.554	5000	180	220	400	26	15	14	7055.55	0	23.7208
555.554	5000	180	220	400	26	15	14	7055.55	0	25.8506
555.554	5000	180	220	400	26	15	14	7055.55	0	23.6856
555.554	5000	180	220	400	26	15	14	7055.55	0	26.6627
555.554	5000	180	220	400	26	15	14	7055.55	0	26.1813
555.554	5000	180	220	400	26	15	14	7055.55	0	25.34
555.554	5000	180	220	400	26	15	14	7055.55	0	24.768
555.554	5000	180	220	400	26	15	14	7055.55	0	25.7524
555.554	5000	180	220	400	26	15	14	7055.55	0	22.6544
555.554	5000	180	220	400	26	15	14	7055.55	0	23.4251
555.554	5000	180	220	400	26	15	14	7055.55	0	22.4078
555.554	5000	180	220	400	26	15	14	7055.55	0	25.329
555.554	5000	180	220	400	26	15	14	7055.55	0	23.9486
555.554	5000	180	220	400	26	15	14	7055.55	0	23.3534
555.554	5000	180	220	400	26	15	14	7055.55	0	22.8634
555.554	5000	180	220	400	26	15	14	7055.55	0	23.6146
555.554	5000	180	220	400	26	15	14	7055.55	0	22.5669
555.554	5000	180	220	400	26	15	14	7055.55	0	22.2641
555.554	5000	180	220	400	26	15	14	7055.55	0	21.0416
555.554	5000	180	220	400	26	15	14	7055.55	0	22.2474
555.554	5000	180	220	400	26	15	14	7055.55	0	24.146
555.554	5000	180	220	400	26	15	14	7055.55	0	21.0876
555.554	5000	180	220	400	26	15	14	7055.55	0	20.0821
555.554	5000	180	220	400	26	15	14	7055.55	0	18.2065
555.554	5000	180	220	400	26	15	14	7055.55	0	18.3292
555.554	5000	180	220	400	26	15	14	7055.55	0	17.8529
566.665	5500	180.952	219.048	380	3	14	15	7106.67	0	18.1775

## Sheet: f9
833.332	5000	200	200	400	6	6	6	7083.33	0	22.6834
833.332	5000	200	200	400	6	6	6	7083.33	0	22.3235
833.332	5000	200	200	400	6	6	6	7083.33	0	22.1213
833.332	5000	200	200	400	6	6	6	7083.33	0	22.176
833.332	5000	200	200	400	6	6	6	7083.33	0	19.7416
833.332	5000	200	200	400	6	6	6	7083.33	0	22.5883
833.332	5000	200	200	400	6	6	6	7083.33	0	20.5118
833.332	5000	200	200	400	6	6	6	7083.33	0	20.8125
833.332	5000	200	200	400	6	6	6	7083.33	0	18.6512
833.332	5000	200	200	400	6	6	6	7083.33	0	20.2254
833.332	5000	200	200	400	6	6	6	7083.33	0	20.5739
833.332	5000	200	200	400	6	6	6	7083.33	0	20.5029
833.332	5000	200	200	400	6	6	6	7083.33	0	20.8174
833.332	5000	200	200	400	6	6	6	7083.33	0	20.9033
833.332	5000	200	200	400	6	6	6	7083.33	0	19.346
833.332	5000	200	200	400	6	6	6	7083.33	0	21.6329
833.332	5000	200	200	400	6	6	6	7083.33	0	21.234
833.332	5000	200	200	400	6	6	6	7083.33	0	21.1385
833.332	5000	200	200	400	6	6	6	7083.33	0	18.7874
833.332	5000	200	200	400	6	6	6	7083.33	0	19.6972
833.332	5000	200	200	400	6	6	6	7083.33	0	18.488
833.332	5000	200	200	400	6	6	6	7083.33	0	18.681
833.332	5000	200	200	400	6	6	6	7083.33	0	19.9448
833.332	5000	200	200	400	6	6	6	7083.33	0	20.593
833.332	5000	200	200	400	6	6	6	7083.33	0	20.6379
833.332	5000	200	200	400	6	6	6	7083.33	0	20.5975
833.332	5000	200	200	400	6	6	6	7083.33	0	18.6789
833.332	5000	200	200	400	6	6	6	7083.33	0	21.1803
833.332	5000	200	200	400	6	6	6	7083.33	0	19.5663
833.332	5000	200	200	400	6	6	6	7083.33	0	21.8526

## Sheet: f10
833.332	5000	200	200	400	4	3	3	7133.33	0	22.2227
833.332	5000	200	200	400	4	3	3	7133.33	0	22.98
833.332	5000	200	200	400	4	3	3	7133.33	0	24.4077
833.332	5000	200	200	400	4	3	3	7133.33	0	22.6524
833.332	5000	200	200	400	4	3	3	7133.33	0	21.2239
833.332	5000	200	200	400	4	3	3	7133.33	0	18.8987
833.332	5000	200	200	400	4	3	3	7133.33	0	19.0294
833.332	5000	200	200	400	4	3	3	7133.33	0	19.4661
833.332	5000	200	200	400	4	3	3	7133.33	0	18.7655
833.332	5000	200	200	400	4	3	3	7133.33	0	20.2091
833.332	5000	200	200	400	4	3	3	7133.33	0	18.9531
833.332	5000	200	200	400	4	3	3	7133.33	0	19.5853
833.332	5000	200	200	400	4	3	3	7133.33	0	18.5707
833.332	5000	200	200	400	4	3	3	7133.33	0	19.1921
833.332	5000	200	200	400	4	3	3	7133.33	0	18.5088
833.332	5000	200	200	400	4	3	3	7133.33	0	19.3189
833.332	5000	200	200	400	4	3	3	7133.33	0	18.0359
833.332	5000	200	200	400	4	3	3	7133.33	0	19.3075
833.332	5000	200	200	400	4	3	3	7133.33	0	19.587
833.332	5000	200	200	400	4	3	3	7133.33	0	19.1334
833.332	5000	200	200	400	4	3	3	7133.33	0	18.7457
833.332	5000	200	200	400	4	3	3	7133.33	0	18.0942
833.332	5000	200	200	400	4	3	3	7133.33	0	19.3781
833.332	5000	200	200	400	4	3	3	7133.33	0	18.2609
833.332	5000	200	200	400	4	3	3	7133.33	0	18.6367
833.332	5000	200	200	400	4	3	3	7133.33	0	20.1116
833.332	5000	200	200	400	4	3	3	7133.33	0	18.6961
833.332	5000	200	200	400	4	3	3	7133.33	0	19.824
833.332	5000	200	200	400	4	3	3	7133.33	0	19.087
833.333	5000	200	200	400	4	3	3	7133.34	0	21.814

[truncated: 18 more sheets: f11, f12, f13, f14, f15, f16, f17, f18, f19, f20, f21, f22, f23, f24, f25, f26, f27, f28]
