# Supplementary material for: Efficiently handling constraints in mixed-integer nonlinear programming problems using gradient-based repair differential evolution
Source: PeerJ journal article supplement (doi:10.7717/peerj-cs.2095), 2024-05-31
Supplement: Supplemental_File_2.zip [file DE_CaR_S_SOP.xls]

## Sheet: Hoja1
Execution	t1	t2	t3	t4	t5	t6	t7	w1	w2	w3	w4	w5	w6	f(x)	G(x)	Time execution
1	2.43137	16.8586	19.4464	40.1073	54.5518	54.7028	57.6216	2	1	3	1	3	3	1.35296	3.07084	207.448
2	2.49735	13.685	17.759	39.6977	45.9731	53.163	57.7428	2	2	3	1	1	3	1.37441	3.12988	162.664
3	2.43199	17.2502	18.6994	39.9909	51.7978	53.9654	57.6886	2	1	3	1	1	3	1.36318	3.05298	182.843
4	2.43136	17.2453	18.7958	35.3917	36.8218	40.7519	57.3599	2	1	3	3	3	1	1.38272	3.28982	180.105
5	2.43454	17.6076	21.1513	38.7802	48.8745	50.9393	57.4881	2	3	3	1	3	1	1.38997	2.79309	165.509
6	2.4345	17.4967	18.3877	39.9558	53.4486	57.6966	57.7409	2	1	3	1	3	3	1.36728	3.1477	163.095
7	3.19521	18.4279	19.5478	28.1825	29.0008	32.308	61.0702	2	2	2	3	4	3	1.74129	9.25312	161.336
8	2.44356	17.3804	18.4833	39.9499	54.1726	54.5757	57.6566	2	1	3	1	3	3	1.36906	3.12159	162.088
9	2.50988	17.0842	18.0282	18.9831	40.1564	54.6768	57.6997	2	1	1	3	1	3	1.35659	3.21867	162.3
10	2.45315	17.2678	18.566	35.6069	39.9897	54.3927	57.7227	2	1	3	3	1	3	1.36541	3.05818	161.846
11	2.51266	17.0624	17.9279	19.1428	40.1039	54.1934	57.6886	2	1	1	3	1	3	1.35311	3.16475	174.298
12	2.4867	17.0237	17.4702	19.2089	35.6663	40.7098	57.3984	2	1	1	3	3	1	1.37215	3.44767	171.477
13	2.43818	17.1563	18.8515	40.0489	54.0901	57.7029	63.1206	2	1	3	1	3	4	1.36002	3.07567	168.493
14	2.5001	6.17199	17.0824	18.2023	18.9375	40.6049	57.4065	2	2	1	1	3	1	1.37484	3.50926	179.772
15	2.51498	8.12244	17.1571	18.8392	40.1588	54.4537	57.6812	2	2	1	3	1	3	1.35884	3.12199	170.951
16	2.454	17.101	19.2451	40.2446	54.1027	57.6416	58.5486	2	1	3	1	3	4	1.35643	3.36814	167.469
17	2.50739	17.7796	40.0611	54.511	54.7098	57.6032	64.5439	2	3	1	3	3	4	1.38119	3.03656	166.986
18	2.44026	17.263	18.7089	40.3723	55.5274	55.7617	57.538	2	1	3	1	3	3	1.3717	3.10698	168.231
19	2.56661	17.7671	40.0971	54.5416	54.6892	57.6076	62.5697	2	3	1	3	3	4	1.37943	3.00554	175.99
20	2.52558	5.56113	9.92164	17.7535	39.8151	53.3277	57.7049	2	2	2	3	1	3	1.37451	3.05474	167.209
21	2.43136	16.8586	16.9251	19.4464	40.1009	54.1284	57.7032	2	1	1	3	1	3	1.35006	3.11695	168.9
22	2.5271	8.03786	17.0589	19.0266	35.789	40.5625	57.3692	2	2	1	3	3	1	1.37258	3.45637	165.673
23	2.51874	17.7014	17.8335	35.5745	39.995	54.3061	57.6845	2	1	3	3	1	3	1.3763	3.00584	174.066
24	2.53889	17.7523	39.9674	53.439	57.133	57.8258	57.8873	2	3	1	3	3	3	1.37095	3.294	159.754
25	2.56662	17.8086	35.4478	36.9571	39.9362	53.2925	57.7171	2	3	3	3	1	3	1.37352	2.89896	174.156
26	2.56664	17.767	40.0966	54.5411	54.6911	57.6076	60.6347	2	3	1	3	3	4	1.37943	3.00575	183.879
27	2.54479	5.55722	17.7236	35.9287	39.7039	52.9595	57.8401	2	2	3	3	1	3	1.37009	3.08389	165.195
28	2.56662	17.7361	35.6072	39.9968	54.0725	57.7029	57.7178	2	3	3	1	3	3	1.37539	2.93794	177.24
29	2.43263	17.2272	18.7469	39.9889	42.8765	53.9204	57.6923	2	1	3	1	1	3	1.3621	3.05232	173.533
30	2.43235	16.8301	17.9666	19.4971	39.9501	53.6421	57.7412	2	1	1	3	1	3	1.34652	3.1378	167.146
