# Supplementary material for: Efficiently handling constraints in mixed-integer nonlinear programming problems using gradient-based repair differential evolution
Source: PeerJ journal article supplement (doi:10.7717/peerj-cs.2095), 2024-05-31
Supplement: Supplemental_File_2.zip [file EDAmv.xlsx]

## Sheet: f1
-1	0	13	0	0.245734
-1	0	13	0	0.216669
-1	0	13	0	0.228968
-1	0	13	0	0.236576
-1	0	13	0	0.230772
-1	0	13	0	0.234067
-1	0	13	0	0.235244
-1	0	13	0	0.227864
-1	0	13	0	0.227033
-1	0	13	0	0.355436
-1	0	13	0	0.239643
-1	0	13	0	0.242429
-1	0	13	0	0.302455
-1	0	13	0	0.255439
-1	0	13	0	0.229601
-1	0	13	0	0.260902
-1	0	13	0	0.219139
-1	0	13	0	0.255428
-1	0	13	0	0.267483
-1	0	13	0	0.28174
-1	0	13	0	0.271327
-1	0	13	0	0.23585
-1	0	13	0	0.233693
-1	0	13	0	0.531459
-1	0	13	0	0.23548
-1	0	13	0	0.223601
-1	0	13	0	0.265109
-1	0	13	0	0.224502
-1	0	13	0	0.224544
-2.67736e-16	-1	17	0	0.244788

## Sheet: f2
4.25634e-09	1	1	1	0	0.488919
7.34595e-09	1	1	1	0	0.476186
2.82215e-09	1	1	1	0	0.384414
9.15335e-09	1	1	1	0	0.485645
1.86524e-09	1	1	1	0	0.888886
-4.90941e-09	1	1	1	0	0.42808
1.84726e-09	1	1	1	0	0.47605
-4.79873e-09	1	1	1	0	0.435873
7.64029e-10	1	1	1	0	0.444633
-6.58498e-09	1	1	1	0	0.416539
-3.38272e-09	1	1	1	0	0.580614
-8.38971e-09	1	1	1	0	0.496667
-4.76014e-11	1	1	1	0	0.482489
4.84496e-09	1	1	1	0	0.490202
1.02034e-08	1	1	1	0	0.442067
-4.7923e-09	1	1	1	0	0.872247
-4.5695e-09	1	1	1	0	0.417712
-5.79375e-09	1	1	1	0	0.512896
7.26807e-09	1	1	1	0	0.531406
-2.73131e-09	1	1	1	0	0.424218
-1.17873e-09	1	1	1	0	0.629217
4.91189e-09	1	1	1	0	0.392167
1.69387e-09	1	1	1	0	0.478501
7.2441e-09	1	1	1	0	0.499663
5.26733e-09	1	1	1	0	0.544407
1.92188e-09	1	1	1	0	0.474824
3.51316e-09	1	1	1	0	0.454991
8.39882e-09	1	1	1	0	0.536069
2.21888e-09	1	1	1	0	0.401518
-5.53772e-09	1	1	1	0	0.548704

## Sheet: f3
1	3	-4	0	0.35792
1	3	-4	0	0.310447
1	3	-4	0	0.393612
1	3	-4	0	0.316895
1	3	-4	0	0.60629
1	3	-4	0	0.408655
1	3	-4	0	0.436652
1	3	-4	0	0.334072
1	3	-4	0	0.406374
1	3	-4	0	0.398448
1	3	-4	0	0.323525
1	3	-4	0	0.373628
1	3	-4	0	0.491907
1	3	-4	0	0.300721
1	3	-4	0	0.344553
1	3	-4	0	0.365046
1	3	-4	0	0.311973
1	3	-4	0	0.577813
1	3	-4	0	0.411587
1	3	-4	0	0.458181
1	3	-4	0	0.346308
1	3	-4	0	0.389769
1	3	-4	0	0.421969
1	3	-4	0	0.372382
1	3	-4	0	0.585325
1	3	-4	0	0.383784
1	3	-4	0	0.306561
1	3	-4	0	0.317968
1	3	-4	0	0.322886
1	3	-4	0	0.370927

## Sheet: f4
3	3	-6	0	0.359555
3	3	-6	0	0.390586
3	3	-6	0	0.339042
3	3	-6	0	0.323954
3	3	-6	0	0.369941
3	3	-6	0	0.357296
3	3	-6	0	0.331425
3	3	-6	0	0.375367
3	3	-6	0	0.498518
3	3	-6	0	0.403652
3	3	-6	0	0.368621
3	3	-6	0	0.400884
3	3	-6	0	0.382241
3	3	-6	0	0.415576
3	3	-6	0	0.299601
3	3	-6	0	0.338705
3	3	-6	0	0.33148
3	3	-6	0	0.374609
3	3	-6	0	0.429125
3	3	-6	0	0.305963
3	3	-6	0	0.391398
3	3	-6	0	0.404609
3	3	-6	0	0.41043
3	3	-6	0	0.321048
3	3	-6	0	0.513165
3	3	-6	0	0.369207
3	3	-6	0	0.429463
3	3	-6	0	0.364016
3	3	-6	0	0.44286
3	3	-6	0	0.390417

## Sheet: f5
0.01	0	1.2401	0	0.231383
0.99995	1	0.24995	0	0.22675
0.99995	1	0.24995	0	0.236877
0.99995	1	0.24995	0	0.224565
0.99995	1	0.24995	0	0.220791
0.99995	1	0.24995	0	0.224601
0.99995	1	0.24995	0	0.237996
0.99995	1	0.24995	0	0.221494
0.99995	1	0.24995	0	0.224399
0.99995	1	0.24995	0	0.232998
0.99995	1	0.24995	0	0.227273
0.99995	1	0.24995	0	0.237656
0.99995	1	0.24995	0	0.237639
0.99995	1	0.24995	0	0.256601
0.99995	1	0.24995	0	0.249222
0.99995	1	0.24995	0	0.236755
0.99995	1	0.24995	0	0.264529
0.99995	1	0.24995	0	0.452583
0.99995	1	0.24995	0	0.236814
0.99995	1	0.24995	0	0.221519
0.99995	1	0.24995	0	0.228919
0.01	0	1.2401	0	0.25356
0.01	0	1.2401	0	0.250344
0.01	0	1.2401	0	0.251593
0.01	0	1.2401	0	0.235205
0.01	0	1.2401	0	0.224135
0.01	0	1.2401	0	0.220489
0.01	0	1.2401	0	0.232048
0.01	0	1.2401	0	0.231692
0.01	0	1.2401	0	0.229543

## Sheet: f6
14.225	1	-6783.58	0	0.458006
14.225	1	-6783.58	0	0.537515
14.225	1	-6783.58	0	0.477794
14.225	1	-6783.58	0	0.384692
14.225	1	-6783.58	0	0.391056
14.225	1	-6783.58	0	0.426036
14.225	1	-6783.58	0	0.53805
14.225	1	-6783.58	0	0.365612
14.225	1	-6783.58	0	0.372795
14.225	1	-6783.58	0	0.457021
14.225	1	-6783.58	0	0.375779
14.225	1	-6783.58	0	0.453289
14.225	1	-6783.58	0	0.542349
14.225	1	-6783.58	0	0.442211
14.225	1	-6783.58	0	0.407244
14.225	1	-6783.58	0	0.428954
14.225	1	-6783.58	0	0.401154
14.225	1	-6783.58	0	0.392565
14.225	1	-6783.58	0	0.444136
14.225	1	-6783.58	0	0.356702
14.225	1	-6783.58	0	0.448272
14.225	1	-6783.58	0	0.450058
14.225	1	-6783.58	0	0.454752
14.225	1	-6783.58	0	0.409315
14.225	1	-6783.58	0	0.403099
14.225	1	-6783.58	0	0.484258
14.225	1	-6783.58	0	0.383937
14.225	1	-6783.58	0	0.519343
14.225	1	-6783.58	0	0.520364
14.225	1	-6783.58	0	0.430221

## Sheet: f7
-1.25994	2.48314	-0.496648	1	-1	0.211439	0	0.485197
-1.25994	2.48314	0.496648	1	1	0.211439	0	0.444532
-1.25994	2.48314	-0.496648	1	-1	0.211439	0	0.439454
-1.25994	2.48314	-0.496648	1	-1	0.211439	0	0.455094
-1.25994	-2.48314	-0.496648	1	1	0.211439	0	0.475727
-1.25994	-2.48314	0.496648	1	-1	0.211439	0	0.444577
-1.25994	-2.48314	0.496648	1	-1	0.211439	0	0.470001
-1.25994	2.48314	-0.496648	1	-1	0.211439	0	0.541928
-1.25994	-2.48314	0.496648	1	-1	0.211439	0	0.477881
-1.25994	2.48314	-0.496648	1	-1	0.211439	0	0.484091
-0.0464159	-2.22451	0.222461	-1	2	0.9551	0	0.608844
-1	2.91244	0.719463	0	0	1	0	0.696403
-0.0464159	2.22451	-0.222461	-1	2	0.9551	0	0.750348
-1.00003	2.91426	0.712048	0	0	1	0	0.456145
-1.00001	0.00698752	-5.11392e-08	0	3	1	0	0.44414
-1.25994	-1.83817	0.183827	1	-2	0.426784	0	0.461741
-0.0464159	2.77314	-0.554648	-1	1	0.931096	0	0.455303
-0.00578078	0.00814127	0.000549414	-1	-3	1	0	0.451182
-1.00003	0.409155	-2.97196	0	0	1	0	0.476834
-0.0464159	2.77314	-0.554648	-1	1	0.931096	0	0.434128
-1.00002	0.374512	-2.97653	0	0	1	0	0.469967
-1.25994	-1.83817	-0.183827	1	2	0.426784	0	0.476143
-1.00001	-2.98526	0.297026	0	0	1	0	0.453335
-0.0464159	-2.77314	-0.554648	-1	-1	0.931096	0	0.446243
-0.0464159	-2.77314	0.554648	-1	1	0.931096	0	0.467249
-0.0464159	-2.77314	0.554648	-1	1	0.931096	0	0.48282
-0.0464159	2.22451	-0.222461	-1	2	0.9551	0	0.497815
-0.0464159	2.77314	0.554648	-1	-1	0.931096	0	0.435912
-0.0464159	-2.77314	0.554648	-1	1	0.931096	0	0.476088
-0.0464159	-2.22451	-0.222461	-1	-2	0.9551	0	0.487715

## Sheet: f8
681.468	2542.38	171.098	186.959	498.333	446	20	10	13123.8	0.0722543	1.23224
1945.41	2506.85	239.815	159.963	499.729	447	20	13	14372.3	0.0504614	1.172
208.35	5000.01	140.001	259.999	400	79	15	12	7768.36	0	1.12976
100	7000	25.2088	288.316	320	42	11	9	8920	0	1.14403
201.689	1000	138.968	261.008	560	440	23	9	10981.7	0.252579	1.17366
283.952	1514.48	142.077	223.926	539.212	442	22	9	11618.4	0.194807	1.07787
100	7000	40.4576	228.102	320	76	11	10	9600	0	1.11322
208.333	5000.58	140	260	399.996	80	15	12	7788.91	0	1.0903
100	6000	44.3946	203.561	360	122	13	9	9520	0	1.15082
100	5500	107.11	217.823	380	94	14	10	8460	0	1.16818
1046.44	1500	211.297	188.659	540	449	22	12	12506.4	0.171757	1.15614
100	1000	114.076	248.523	563.364	449	24	8	11060	0.314811	1.12374
100	5000.08	120.001	279.549	399.999	93	15	11	7940.08	0	1.15667
100	6500	81.3962	170.679	340	53	12	9	8640	0	1.15849
100	7500	78.771	321.221	300	39	10	10	9360	0	1.17877
100	7000	60.2882	137.32	320	16	11	11	8400	0	1.24329
359.796	3500.16	160.029	239.034	460	348	18	10	11800	0	1.1933
100	6500	53.819	84.2443	340	39	12	10	8360	0	1.21186
100	6000	78.2922	112.228	360	66	13	9	8400	0	1.25122
100	3500	100.041	299.773	460	380	18	7	12180	0	1.3347
100	5500	65.5193	300.691	380	121	14	9	9000	0	1.48775
100.178	1022.82	115.09	227.639	558.299	431	23	8	10723	0.262275	1.22043
100	1502.72	96.7474	302.402	539.823	447	22	7	11522.7	0.208131	1.25192
371.291	1000	161.629	238.329	560	437	23	10	11091.3	0.245927	1.29411
100	6501.93	49.7579	32.9354	339.973	90	12	10	9381.93	0	1.17261
100	4000	63.7649	199.439	440	283	17	6	10740	0	1.24011
102.121	4504.88	90.5842	151.436	419.975	169	16	8	8967	0	1.2587
100	3500	100.536	297.08	460	362	18	7	11820	0	1.24617
1249.31	3000	219.908	180.092	480	449	19	12	14209.3	0.000229621	1.27347
227.951	1865.29	142.165	255.905	520.704	443	22	9	11933.2	0.194587	1.24555

## Sheet: f9
100	5009.44	100	231.039	399.854	180	6	4	15059.4	0	1.11142
100	7500	120.142	278.555	300	3	4	5	8700	0	0.964171
1500	2500.31	228.571	171.428	499.992	181	8	5	14000.3	0.0535714	0.988016
100	3750	50.6569	349.34	450	147	7	2	12150	0	1.03649
100	2500.03	113.235	280.872	499.999	176	8	3	12350	0.0919118	1.06867
100	6264.19	104.134	268.008	349.966	61	5	3	10364.2	0	0.990293
100	7500.02	19.9591	92.5444	300	28	4	4	9950.02	0	0.975728
1757.78	7260.31	234.085	173.25	341.357	65	5	5	13218.1	0.0183365	0.993467
100	7500	93.9005	126.353	300	8	4	4	8950	0	1.0101
1295.19	1277.12	221.264	178.459	548.152	180	9	5	12522.3	0.196839	1.01183
277.778	3750.27	150	250	450	89	7	4	9428.05	0	1.10885
100	6252.13	13.9224	135.564	349.969	37	5	3	9152.13	0	1.0497
100	7500	50.3553	23.3482	300	17	4	5	9400	0	1.03439
100	1250	104.819	141.065	550	172	9	3	10900	0.237952	1.04851
839.918	1305.18	163.873	166.451	545.814	179	9	4	12045.1	0.215318	1.03967
454.544	2500.4	170.588	229.412	499.984	176	8	4	12704.9	0.0735294	0.953445
1524.06	2506.87	228.448	170.996	499.951	180	8	5	13980.9	0.0538793	1.07867
100	6250	50.6713	340.496	350	29	5	4	8750	0	1.10544
100	6250.25	50.0192	307.222	350	21	5	4	8350.25	0	1.05055
100	2500	114.286	222.966	500	181	8	3	12600	0.0892857	1.05173
100	6250	64.9242	210.962	350	72	5	4	10900	0	1.0187
1493.64	2640.47	227.941	171.455	497.601	176	8	5	13884.1	0.0551471	0.954393
277.777	3750.04	150	250	449.999	177	7	4	13827.8	0	0.971374
100	1250	106.14	207.284	550	177	9	3	11150	0.234649	1.03463
1475.41	2500.04	227.811	172.189	500	175	8	5	13675.4	0.0554734	0.999475
100	6253.77	100.023	152.419	349.946	7	5	5	7653.77	0	1.02096
100	8750	10.2698	98.7675	250	1	3	4	9850	0	1.02204
100	5000	100.02	298.689	400	64	6	4	9250	0	1.05069
280.909	3750	150.309	249.246	450	130	7	4	11480.9	0	1.01457
1287.88	1585.9	221.429	178.571	529.027	181	9	5	12873.8	0.196429	1.05829

## Sheet: f10
100	5000.42	100.227	280.17	399.992	18	3	2	7800.42	0	0.952423
100	7500	85.9478	73.0888	300	9	2	2	9400	0	0.859531
100	7521.06	78.4357	300.376	300	7	2	2	9221.06	0	0.848648
100	7500	102.977	264.877	300	2	2	3	8700	0	0.858978
100	5000	101.528	219.195	400	26	3	2	8600	0	0.848198
483.359	2512.05	171.429	228.45	499.971	91	4	2	12995.4	0.0714286	0.829933
100	7500.01	13.5931	334.912	300	11	2	2	9600.01	0	0.892788
499.638	2756.16	171.098	227.652	490.761	90	4	2	13155.8	0.0722543	0.932644
100	7500	88.2952	308.449	300	7	2	2	9200	0	0.855556
100	7500	104.924	294.268	300	18	2	2	10300	0	0.926295
649.709	2561.51	171.429	195.697	498.848	91	4	2	13211.2	0.0714286	0.900252
10000	2510.16	284.615	115.385	499.886	86	4	3	22010.2	0.0384615	0.854013
100	5000.19	14.0622	385.916	400	45	3	1	10500.2	0	0.988076
100	5000	103.446	214.084	400	23	3	2	8300	0	0.879164
100	1000	42.1965	133.9	531.091	90	5	1	11000	0.394509	0.899617
100	7500	22.9395	237.057	300	6	2	2	9100	0	0.942389
878.291	2510.03	171.098	170.458	499.86	90	4	2	13288.3	0.0722543	0.950897
100	7500	109.103	290.846	300	24	2	2	10900	0	0.908487
571.093	2516.68	171.429	204.272	499.361	91	4	2	13087.8	0.0714286	0.994145
559.395	2724.03	171.098	228.437	492.076	90	4	2	13183.4	0.0722543	0.979611
567.045	1000.14	156.647	183.299	587.932	90	5	2	11467.2	0.358382	0.944302
535.448	2508.44	171.429	215.743	499.696	91	4	2	13043.9	0.0714286	0.886889
100	5000	108.822	259.883	400	32	3	2	9200	0	0.87626
100	5000	100.063	266.493	400	20	3	2	8000	0	0.981935
100	5000.26	100.797	133.635	399.995	20	3	2	8000.26	0	1.02456
100	7500.39	100.112	221.531	299.999	2	2	3	8700.39	0	1.00945
100	5000	104.144	295.835	400	18	3	2	7800	0	0.985957
4867.9	6848.56	57.1426	342.773	437.295	91	4	1	21716.5	0.107144	0.939854
480.354	2767.17	171.098	227.723	490.595	90	4	2	13147.5	0.0722543	0.896002
100	5000	102.007	138.286	400	20	3	2	8000	0	0.938423

[truncated: 18 more sheets: f11, f12, f13, f14, f15, f16, f17, f18, f19, f20, f21, f22, f23, f24, f25, f26, f27, f28]
