# Supplementary material for: Efficiently handling constraints in mixed-integer nonlinear programming problems using gradient-based repair differential evolution
Source: PeerJ journal article supplement (doi:10.7717/peerj-cs.2095), 2024-05-31
Supplement: Supplemental_File_2.zip [file FROFI_CaR.xls]

## Sheet: f1
-1	0	13	0	7.56539
-1	0	13	0	7.34951
-1	0	13	0	7.34147
-1	0	13	0	7.3474
-1	0	13	0	7.32033
-1	0	13	0	7.3037
-1	0	13	0	7.22591
-1	0	13	0	7.29805
-1	0	13	0	7.30126
-1	0	13	0	7.26825
-1	0	13	0	7.19496
-1	0	13	0	7.28938
-1	0	13	0	7.23721
-1	0	13	0	7.21715
-1	0	13	0	7.25125
-1	0	13	0	7.23864
-1	0	13	0	7.28319
-1	0	13	0	7.21262
-1	0	13	0	7.22666
-1	0	13	0	7.29416
-1	0	13	0	7.43784
-1	0	13	0	7.23981
-1	0	13	0	7.20907
-1	0	13	0	7.21904
-1	0	13	0	7.27201
-1	0	13	0	7.25335
-1	0	13	0	7.26308
-1	0	13	0	7.22893
-1	0	13	0	7.28695
-1	0	13	0	7.25647

## Sheet: f2
6.44727e-09	1	1	1	0	6.54561
-6.04704e-09	1	1	1	0	6.48037
-3.15669e-09	1	1	1	0	6.32287
-3.90659e-09	1	1	1	0	6.29789
1.35172e-09	1	1	1	0	6.22973
1.5335e-10	1	1	1	0	6.1966
-8.81213e-09	1	1	1	0	6.23799
4.50092e-09	1	1	1	0	6.27661
5.75247e-09	1	1	1	0	6.22936
-7.10347e-09	1	1	1	0	6.19844
3.04439e-09	1	1	1	0	6.20689
9.34038e-09	1	1	1	0	6.25781
2.95042e-09	1	1	1	0	6.18756
-3.77643e-09	1	1	1	0	6.19222
4.94322e-09	1	1	1	0	6.16296
4.38744e-09	1	1	1	0	6.01506
9.95967e-09	1	1	1	0	6.10242
1.00478e-09	1	1	1	0	6.19274
4.30024e-09	1	1	1	0	6.1347
-9.83067e-09	1	1	1	0	6.20498
5.25768e-09	1	1	1	0	6.06043
9.40133e-09	1	1	1	0	6.19737
-7.91294e-10	1	1	1	0	6.21479
1.95153e-09	1	1	1	0	6.20605
-3.44868e-09	1	1	1	0	6.46018
-9.54644e-09	1	1	1	0	6.26903
5.83515e-09	1	1	1	0	6.17673
-7.59678e-09	1	1	1	0	6.2445
-7.26974e-09	1	1	1	0	6.16893
4.50333e-09	1	1	1	0	6.13605

## Sheet: f3
1	3	-4	0	7.57693
1	3	-4	0	7.64992
1	3	-4	0	7.59227
1	3	-4	0	7.56185
1	3	-4	0	7.67834
1	3	-4	0	7.68135
1	3	-4	0	7.52209
1	3	-4	0	7.52835
1	3	-4	0	7.54349
1	3	-4	0	7.60702
1	3	-4	0	7.54345
1	3	-4	0	7.5622
1	3	-4	0	7.53582
1	3	-4	0	7.60619
1	3	-4	0	7.53505
1	3	-4	0	7.45317
1	3	-4	0	7.69926
1	3	-4	0	7.60373
1	3	-4	0	8.07742
1	3	-4	0	7.59658
1	3	-4	0	7.67507
1	3	-4	0	7.59426
1	3	-4	0	7.56625
1	3	-4	0	7.65777
1	3	-4	0	7.60207
1	3	-4	0	7.59119
1	3	-4	0	7.51054
1	3	-4	0	7.54918
1	3	-4	0	7.62148
1	3	-4	0	7.55906

## Sheet: f4
3	3	-6	0	7.62226
3	3	-6	0	7.46622
3	3	-6	0	7.24496
3	3	-6	0	7.52879
3	3	-6	0	7.50429
3	3	-6	0	7.51938
3	3	-6	0	7.25348
3	3	-6	0	7.21622
3	3	-6	0	7.51685
3	3	-6	0	7.51013
3	3	-6	0	7.55922
3	3	-6	0	7.56031
3	3	-6	0	7.519
3	3	-6	0	7.51703
3	3	-6	0	7.54471
3	3	-6	0	7.75246
3	3	-6	0	7.46766
3	3	-6	0	7.51846
3	3	-6	0	7.53834
3	3	-6	0	7.65079
3	3	-6	0	7.49758
3	3	-6	0	7.20304
3	3	-6	0	7.53218
3	3	-6	0	7.56295
3	3	-6	0	7.53406
3	3	-6	0	7.4892
3	3	-6	0	7.57757
3	3	-6	0	7.57605
3	3	-6	0	7.49996
3	3	-6	0	7.51414

## Sheet: f5
0.99995	1	0.24995	0	4.94791
0.99995	1	0.24995	0	5.02522
0.99995	1	0.24995	0	4.89172
0.99995	1	0.24995	0	4.90429
0.99995	1	0.24995	0	4.8174
0.99995	1	0.24995	0	4.77975
0.99995	1	0.24995	0	4.81906
0.99995	1	0.24995	0	4.85948
0.99995	1	0.24995	0	4.91605
0.99995	1	0.24995	0	4.88995
0.99995	1	0.24995	0	4.89079
0.99995	1	0.24995	0	4.88768
0.99995	1	0.24995	0	4.83492
0.99995	1	0.24995	0	4.7972
0.99995	1	0.24995	0	4.97884
0.99995	1	0.24995	0	4.85146
0.99995	1	0.24995	0	4.94955
0.99995	1	0.24995	0	4.79584
0.99995	1	0.24995	0	4.83632
0.99995	1	0.24995	0	4.63751
0.99995	1	0.24995	0	4.83482
0.99995	1	0.24995	0	4.88935
0.99995	1	0.24995	0	4.84613
0.99995	1	0.24995	0	5.06803
0.99995	1	0.24995	0	4.89324
0.99995	1	0.24995	0	4.89215
0.99995	1	0.24995	0	5.09968
0.99995	1	0.24995	0	4.77607
0.99995	1	0.24995	0	4.7622
0.99995	1	0.24995	0	4.83206

## Sheet: f6
14.225	1	-6783.58	0	6.09137
14.225	1	-6783.58	0	5.75151
14.225	1	-6783.58	0	5.5252
14.225	1	-6783.58	0	5.82487
14.225	1	-6783.58	0	5.76934
14.225	1	-6783.58	0	6.06279
14.225	1	-6783.58	0	5.60203
14.225	1	-6783.58	0	5.45073
14.225	1	-6783.58	0	5.87154
14.225	1	-6783.58	0	6.13339
14.225	1	-6783.58	0	5.56866
14.225	1	-6783.58	0	5.67417
14.225	1	-6783.58	0	5.78856
14.225	1	-6783.58	0	5.74607
14.225	1	-6783.58	0	5.71811
14.225	1	-6783.58	0	5.73572
14.225	1	-6783.58	0	6.12827
14.225	1	-6783.58	0	5.85328
14.225	1	-6783.58	0	6.11423
14.225	1	-6783.58	0	6.10791
14.225	1	-6783.58	0	5.74681
14.225	1	-6783.58	0	6.26418
14.225	1	-6783.58	0	5.82956
14.225	1	-6783.58	0	5.95814
14.225	1	-6783.58	0	5.69424
14.225	1	-6783.58	0	6.05796
14.225	1	-6783.58	0	5.78303
14.225	1	-6783.58	0	5.58907
14.225	1	-6783.58	0	5.5207
14.225	1	-6783.58	0	5.72348

## Sheet: f7
-1.25994	1	-2.48314	1	-0.496648	0.211439	0	7.81686
-1.25994	1	-2.48314	-1	0.496648	0.211439	0	7.7334
-1.25994	1	-2.48314	1	-0.496648	0.211439	0	7.67036
-1.25994	1	2.48314	-1	-0.496648	0.211439	0	7.63151
-1.25994	1	-2.48314	-1	0.496648	0.211439	0	7.69555
-1.25994	1	-2.48314	1	-0.496648	0.211439	0	7.72627
-1.25994	1	-2.48314	1	-0.496648	0.211439	0	7.64939
-1.25994	1	-2.48314	1	-0.496648	0.211439	0	7.75937
-1.25994	1	-2.48314	1	-0.496648	0.211439	0	7.71415
-1.25994	1	-2.48314	-1	0.496648	0.211439	0	7.73327
-1.25994	1	-2.48314	1	-0.496648	0.211439	0	7.68533
-1.25994	1	2.48314	1	0.496648	0.211439	0	7.69755
-1.25994	1	-2.48314	-1	0.496648	0.211439	0	7.67859
-1.25994	1	2.48314	-1	-0.496648	0.211439	0	7.73993
-1.25994	1	2.48314	1	0.496648	0.211439	0	7.7438
-1.25994	1	2.48314	-1	-0.496648	0.211439	0	7.69235
-1.25994	1	-2.48314	-1	0.496648	0.211439	0	7.73
-1.25994	1	-2.48314	1	-0.496648	0.211439	0	7.77296
-1.25994	1	-2.48314	1	-0.496648	0.211439	0	7.69433
-1.25994	1	-2.48314	-1	0.496648	0.211439	0	7.66675
-1.25994	1	-2.48314	-1	0.496648	0.211439	0	7.76526
-1.25994	1	-2.48314	1	-0.496648	0.211439	0	7.93993
-1.25994	1	2.48314	-1	-0.496648	0.211439	0	9.01571
-1.25994	1	-2.48314	-1	0.496648	0.211439	0	8.35594
-1.25994	1	2.48314	1	0.496648	0.211439	0	7.74205
-1.25994	1	2.48314	1	0.496648	0.211439	0	7.7892
-1.25994	1	2.48314	-1	-0.496648	0.211439	0	7.65804
-1.25994	1	2.48314	-1	-0.496648	0.211439	0	7.77295
-1.25994	1	-2.48314	1	-0.496648	0.211439	0	7.71686
-1.25994	1	-2.48314	1	-0.496648	0.211439	0	7.72954

## Sheet: f8
555.554	1500	5000	180	300	220	280	400	7055.55	0	7.64874
555.554	1500	5000	180	300	220	280	400	7055.55	0	7.73028
555.554	1500	5000	180	300	220	280	400	7055.55	0	7.76054
555.554	1500	5000	180	300	220	280	400	7055.55	0	7.76334
555.554	1500	5000	180	300	220	280	400	7055.55	0	7.7175
555.554	1500	5000	180	300	220	280	400	7055.55	0	7.73687
555.554	1500	5000	180	300	220	280	400	7055.55	0	7.90941
555.554	1500	5000	180	300	220	280	400	7055.55	0	7.83185
555.554	1500	5000	180	300	220	280	400	7055.55	0	7.79655
558.876	1520	5002.43	180.037	300	219.569	280	399.987	7081.31	0	7.71573
555.554	1500	5000	180	300	220	280	400	7055.55	0	7.78234
567.102	1520	5000.9	180.211	300	219.139	280	399.989	7088	0	7.75437
555.554	1500	5000	180	300	220	280	400	7055.55	0	7.76298
555.554	1500	5000	180	300	220	280	400	7055.55	0	7.72687
555.554	1500	5000	180	300	220	280	400	7055.55	0	7.76595
555.554	1500	5000	180	300	220	280	400	7055.55	0	7.74612
555.554	1500	5000	180	300	220	280	400	7055.55	0	7.68011
563.731	1520	5000.71	180.148	300	218.889	280	399.997	7084.44	0	7.71732
555.554	1500	5000	180	300	220	280	400	7055.55	0	7.74422
555.554	1500	5000	180	300	220	280	400	7055.55	0	7.69802
555.554	1500	5000	180	300	220	280	400	7055.55	0	7.7179
555.554	1500	5000	180	300	220	280	400	7055.55	0	7.78701
555.554	1500	5000	180	300	220	280	400	7055.55	0	7.79074
555.554	1500	5000	180	300	220	280	400	7055.55	0	7.70032
555.554	1500	5000	180	300	220	280	400	7055.55	0	7.71106
555.554	1500	5000	180	300	220	280	400	7055.55	0	7.75774
555.554	1500	5000	180	300	220	280	400	7055.55	0	7.86752
555.554	1500	5000	180	300	220	280	400	7055.55	0	7.69732
555.554	1500	5000	180	300	220	280	400	7055.55	0	7.75996
564.621	1520	5002.31	180.005	300	218.666	280	399.97	7086.94	0	7.75359

## Sheet: f9
833.332	1250	5000	200	300	200	300	400	7083.33	0	7.96272
833.332	1250	5000	200	300	200	300	400	7083.33	0	7.73369
323.035	1900	5020.28	151.413	300	242.298	250	399.732	7243.31	0	7.76589
277.777	1900	5000	150	300	250	250	400	7177.78	0	7.80369
355.133	1950	5031.9	157.037	300	239.955	250	399.453	7337.03	0	7.78837
833.332	1250	5000	200	300	200	300	400	7083.33	0	7.74535
833.332	1250	5000	200	300	200	300	400	7083.33	0	7.81075
833.332	1250	5000	200	300	200	300	400	7083.33	0	7.81474
277.777	1900	5000	150	300	250	250	400	7177.78	0	7.76783
379.41	1900	5086.6	153.583	300	233.869	250	399.238	7366.01	0	7.73479
833.332	1250	5000	200	300	200	300	400	7083.33	0	7.83785
833.332	1250	5000	200	300	200	300	400	7083.33	0	7.81572
833.332	1250	5000	200	300	200	300	400	7083.33	0	7.75093
833.332	1250	5000	200	300	200	300	400	7083.33	0	7.74832
833.332	1250	5000	200	300	200	300	400	7083.33	0	7.86287
277.777	1900	5000	150	300	250	250	400	7177.78	0	7.83569
363.155	1900	5091.29	153.089	300	231.059	250	398.767	7354.44	0	7.77333
833.332	1250	5000	200	300	200	300	400	7083.33	0	7.87694
833.332	1250	5000	200	300	200	300	400	7083.33	0	7.73499
833.332	1250	5000	200	300	200	300	400	7083.33	0	7.81912
833.332	1250	5000	200	300	200	300	400	7083.33	0	7.72351
833.332	1250	5000	200	300	200	300	400	7083.33	0	7.75274
833.332	1250	5000	200	300	200	300	400	7083.33	0	7.85934
833.332	1250	5000	200	300	200	300	400	7083.33	0	7.79489
833.332	1250	5000	200	300	200	300	400	7083.33	0	7.73388
833.332	1250	5000	200	300	200	300	400	7083.33	0	7.74244
833.332	1250	5000	200	300	200	300	400	7083.33	0	7.76204
833.333	1250	5000	200	300	200	300	400	7083.33	0	7.85815
833.332	1250	5000	200	300	200	300	400	7083.33	0	7.8049
833.332	1250	5000	200	300	200	300	400	7083.33	0	7.82633

## Sheet: f10
833.332	1300	5000	200	300	200	300	400	7133.33	0	7.83362
833.332	1300	5000	200	300	200	300	400	7133.33	0	7.94886
833.332	1300	5000	200	300	200	300	400	7133.33	0	7.76984
833.332	1300	5000	200	300	200	300	400	7133.33	0	7.77726
833.332	1300	5000	200	300	200	300	400	7133.33	0	7.87037
833.332	1300	5000	200	300	200	300	400	7133.33	0	7.77311
121.398	2700	5064.35	102.347	300	190.689	200	399.205	7885.75	0	7.8244
833.332	1300	5000	200	300	200	300	400	7133.33	0	7.83572
868.429	1300	5024.04	200.181	300	198.651	300	399.904	7192.47	0	7.93439
833.332	1300	5000	200	300	200	300	400	7133.33	0	7.79655
833.332	1300	5000	200	300	200	300	400	7133.33	0	7.81565
833.332	1300	5000	200	300	200	300	400	7133.33	0	7.7891
833.332	1300	5000	200	300	200	300	400	7133.33	0	7.83739
833.332	1300	5000	200	300	200	300	400	7133.33	0	7.776
833.332	1300	5000	200	300	200	300	400	7133.33	0	7.68795
833.332	1300	5000	200	300	200	300	400	7133.33	0	7.79352
833.332	1300	5000	200	300	200	300	400	7133.33	0	7.90609
833.332	1300	5000	200	300	200	300	400	7133.33	0	7.80099
833.332	1300	5000	200	300	200	300	400	7133.33	0	7.865
833.332	1300	5000	200	300	200	300	400	7133.33	0	7.85211
833.332	1300	5000	200	300	200	300	400	7133.33	0	7.87463
132.483	2600	5082.02	100.272	300	274.775	200	398.648	7814.51	0	7.76032
833.332	1300	5000	200	300	200	300	400	7133.33	0	7.80465
833.332	1300	5000	200	300	200	300	400	7133.33	0	7.81363
188.786	2600	5195.93	104.877	300	126.754	200	399.658	7984.72	0	7.77936
138.205	2700	5080.09	103.016	300	205.53	200	399.917	7918.3	0	7.72038
833.332	1300	5000	200	300	200	300	400	7133.33	0	7.83499
833.332	1300	5000	200	300	200	300	400	7133.33	0	7.82931
833.332	1300	5000	200	300	200	300	400	7133.33	0	7.83254
833.332	1300	5000	200	300	200	300	400	7133.33	0	7.86353

[truncated: 18 more sheets: f11, f12, f13, f14, f15, f16, f17, f18, f19, f20, f21, f22, f23, f24, f25, f26, f27, f28]
