# Supplementary material for: Efficiently handling constraints in mixed-integer nonlinear programming problems using gradient-based repair differential evolution
Source: PeerJ journal article supplement (doi:10.7717/peerj-cs.2095), 2024-05-31
Supplement: Supplemental_File_2.zip [file FROFI_CaR_SOP.xls]

## Sheet: Sheet1
Execution	t1	t2	t3	t4	t5	t6	t7	w1	w2	w3	w4	w5	w6	f(x)	G(x)	Time execution
1	2.72046	17.02	19.1589	39.5781	52.7344	57.7921	57.9561	2	1	3	1	3	3	1.33599	3.51076	300.385
2	2.82251	15.6702	21.3439	24.5397	41.6834	54.9308	59.2056	2	1	3	3	1	3	1.28106	7.3955	299.991
3	2.46007	17.6021	26.0602	29.895	39.0201	52.3475	58.0831	2	3	3	3	1	3	1.3652	3.54238	301.927
4	2.58584	10.7888	17.8849	31.7763	47.4308	49.7151	59.7322	2	2	3	3	2	3	1.44552	8.92732	307.428
5	3.22779	12.1267	17.5478	39.3491	50.3299	53.2553	59.9105	2	2	3	1	3	3	1.31214	8.51565	298.037
6	3.46456	18.4127	18.7788	42.5653	49.5216	52.7241	58.9037	2	3	3	1	1	3	1.3413	7.82318	302.77
7	2.49469	16.2039	20.6885	39.992	54.356	57.6806	59.7548	2	1	3	1	3	4	1.32623	3.40972	296.425
8	3.33569	7.69446	12.8356	17.7741	39.089	49.7667	59.4816	2	2	2	3	1	3	1.31591	6.90638	302.433
9	3.09302	10.7057	18.0461	40.6727	40.6925	50.1415	57.4479	2	2	3	3	1	1	1.38398	4.45526	303.258
10	2.58321	10.8734	16.944	19.3042	40.1156	53.8601	57.8108	2	2	1	3	1	3	1.34464	3.29294	300.148
11	3.79366	17.5135	38.0076	54.7931	58.9012	61.845	64.0613	2	3	1	3	4	4	1.32369	8.28574	305.914
12	2.95783	4.74556	17.6395	37.5379	40.0771	44.9213	57.8092	2	2	3	3	1	1	1.37729	4.98044	301.045
13	2.79187	5.28617	17.6186	20.3435	25.6637	39.9428	57.6276	2	2	3	3	3	1	1.38351	4.2569	304.884
14	2.71358	11.3424	17.5019	39.6805	51.0535	57.674	61.8775	2	2	3	1	1	4	1.38226	4.22929	306.498
15	2.50511	17.5925	24.6594	30.3066	40.1518	53.171	57.5852	2	3	3	3	1	1	1.39151	3.99903	306.331
16	2.5295	4.85869	16.9876	18.8006	39.6052	53.8472	57.8298	2	2	1	3	1	3	1.34953	3.22321	305.657
17	2.56301	8.69224	17.5285	40.6248	41.0474	57.8881	59.6472	2	2	3	1	1	4	1.38656	4.41243	306.987
18	2.43225	10.14	17.1205	18.4833	39.3714	53.8455	57.7907	2	2	1	3	1	3	1.35892	3.32898	301.482
19	2.49456	16.613	17.1774	19.9836	39.8778	53.6759	57.7686	2	1	1	3	1	3	1.3347	3.36026	304.179
20	2.95038	7.52599	16.1768	21.5429	23.6324	41.1622	57.6294	2	2	1	3	3	1	1.32099	4.86509	304.249
21	2.66434	3.72858	5.8055	17.7711	40.2019	54.9331	57.6729	2	2	2	3	1	3	1.37671	3.42882	300.808
22	3.30129	11.93	18.1988	36.1684	40.4701	50.6739	58.7641	2	2	3	3	1	3	1.3362	5.73456	303.739
23	3.84422	18.4672	24.1132	42.6065	56.2219	58.0171	61.5509	2	3	3	1	4	3	1.35091	12.1525	304.613
24	2.77694	18.0892	26.8976	33.0394	41.4304	51.5306	57.3059	2	3	3	3	1	1	1.39584	4.28845	303.676
25	3.40175	12.6188	18.0903	24.4708	35.6471	40.8313	57.7297	2	2	3	3	3	1	1.37475	4.96267	305.005
26	2.69819	14.9415	17.8681	27.6726	39.7105	53.6974	57.6651	2	2	3	3	1	3	1.37121	3.62	295.618
27	2.52501	16.4081	18.1687	20.4567	40.026	54.5783	57.5853	2	1	1	3	1	3	1.33211	3.4704	299.358
28	2.56739	14.3248	16.6374	20.0014	40.0229	53.9599	57.723	2	2	1	3	1	3	1.33409	3.41964	303.305
29	2.436	16.6796	19.9947	40.6545	55.1646	57.585	60.1131	2	1	3	1	3	4	1.34878	3.37169	293.49
30	2.51927	16.5855	19.1897	19.9778	40.1684	53.8416	57.8469	2	1	1	3	1	3	1.33319	3.40951	303.571
