# Supplementary material for: Efficiently handling constraints in mixed-integer nonlinear programming problems using gradient-based repair differential evolution
Source: PeerJ journal article supplement (doi:10.7717/peerj-cs.2095), 2024-05-31
Supplement: Supplemental_File_2.zip [file G_CJADEmi.xlsx]

## Sheet: f1
-1	0	13	0	14.2882
-1	0	13	0	15.346
-1	0	13	0	14.1588
-1	0	13	0	13.2761
-1	0	13	0	12.4352
-1	0	13	0	12.4213
-1	0	13	0	14.127
-1	0	13	0	12.7894
-1	0	13	0	13.8897
-1	0	13	0	12.6299
-1	0	13	0	15.9882
-1	0	13	0	12.7561
-1	0	13	0	15.1425
-1	0	13	0	14.0163
-1	0	13	0	12.2146
-1	0	13	0	13.5219
-1	0	13	0	12.2655
-1	0	13	0	12.6209
-1	0	13	0	14.4618
-1	0	13	0	13.7026
-1	0	13	0	14.0904
-1	0	13	0	14.5268
-1	0	13	0	14.9577
-1	0	13	0	14.4394
-1	0	13	0	12.455
-1	0	13	0	12.7394
-1	0	13	0	14.0598
-1	0	13	0	13.7262
-1	0	13	0	14.3501
-1	0	13	0	12.6829

## Sheet: f2
-8.64804e-09	1	1	1	0	10.549
-6.53899e-09	1	1	1	0	10.7062
1.01906e-08	1	1	1	0	11.0436
-2.41005e-09	1	1	1	0	10.9364
1.3934e-09	1	1	1	0	11.0387
-2.18596e-09	1	1	1	0	10.6341
1.65275e-09	1	1	1	0	11.8385
2.03106e-09	1	1	1	0	11.2827
-5.27334e-09	1	1	1	0	10.6574
9.87105e-09	1	1	1	0	10.9929
1.08722e-09	1	1	1	0	10.8738
1.33558e-09	1	1	1	0	10.8926
-2.30235e-09	1	1	1	0	10.9641
9.76479e-10	1	1	1	0	10.751
-2.47842e-09	1	1	1	0	10.8642
-2.00126e-09	1	1	1	0	11.15
2.80289e-09	1	1	1	0	10.8799
2.6636e-09	1	1	1	0	10.7904
-5.24447e-09	1	1	1	0	10.8538
-2.04094e-09	1	1	1	0	11.053
2.80176e-09	1	1	1	0	10.5542
-8.70481e-09	1	1	1	0	10.8553
1.66109e-09	1	1	1	0	10.5663
9.84598e-09	1	1	1	0	10.7317
1.32441e-09	1	1	1	0	10.6409
-2.38112e-09	1	1	1	0	10.9533
2.8126e-09	1	1	1	0	10.7148
-2.39122e-09	1	1	1	0	10.7098
-2.19801e-09	1	1	1	0	10.4438
2.32606e-09	1	1	1	0	10.9265

## Sheet: f3
1	3	-4	0	13.8053
1	3	-4	0	13.1631
1	3	-4	0	13.58
1	3	-4	0	13.7025
1	3	-4	0	13.6674
1	3	-4	0	13.1216
1	3	-4	0	13.1952
1	3	-4	0	13.6415
1	3	-4	0	13.1049
1	3	-4	0	13.5528
1	3	-4	0	14.2395
1	3	-4	0	13.7542
1	3	-4	0	12.656
1	3	-4	0	13.6344
1	3	-4	0	13.6452
1	3	-4	0	13.4456
1	3	-4	0	13.8729
1	3	-4	0	13.2349
1	3	-4	0	13.2249
1	3	-4	0	13.5749
1	3	-4	0	13.5783
1	3	-4	0	13.6659
1	3	-4	0	13.4887
1	3	-4	0	13.4568
1	3	-4	0	13.9378
1	3	-4	0	13.7054
1	3	-4	0	12.8726
1	3	-4	0	13.3554
1	3	-4	0	13.2674
1	3	-4	0	13.5809

## Sheet: f4
3	3	-6	0	12.246
3	3	-6	0	12.1236
3	3	-6	0	12.657
3	3	-6	0	12.3725
3	3	-6	0	12.2309
3	3	-6	0	12.4688
3	3	-6	0	12.396
3	3	-6	0	12.3521
3	3	-6	0	12.4802
3	3	-6	0	12.2446
3	3	-6	0	12.172
3	3	-6	0	12.4695
3	3	-6	0	12.4664
3	3	-6	0	12.3819
3	3	-6	0	12.5198
3	3	-6	0	12.4152
3	3	-6	0	12.6126
3	3	-6	0	12.0808
3	3	-6	0	11.9591
3	3	-6	0	12.5276
3	3	-6	0	13.0559
3	3	-6	0	12.2707
3	3	-6	0	12.5996
3	3	-6	0	11.982
3	3	-6	0	12.0697
3	3	-6	0	12.2106
3	3	-6	0	12.5188
3	3	-6	0	12.4257
3	3	-6	0	12.055
3	3	-6	0	12.6494

## Sheet: f5
0.99995	1	0.24995	0	13.7033
0.99995	1	0.24995	0	13.4567
0.99995	1	0.24995	0	13.5415
0.99995	1	0.24995	0	13.305
0.99995	1	0.24995	0	13.8
0.99995	1	0.24995	0	13.9933
0.99995	1	0.24995	0	13.5678
0.99995	1	0.24995	0	13.4994
0.99995	1	0.24995	0	13.4869
0.99995	1	0.24995	0	13.4561
0.99995	1	0.24995	0	13.8026
0.99995	1	0.24995	0	13.5703
0.99995	1	0.24995	0	13.4089
0.99995	1	0.24995	0	13.5191
0.99995	1	0.24995	0	13.3257
0.99995	1	0.24995	0	13.4687
0.99995	1	0.24995	0	13.363
0.99995	1	0.24995	0	13.7855
0.99995	1	0.24995	0	13.8216
0.99995	1	0.24995	0	13.1993
0.99995	1	0.24995	0	13.5809
0.99995	1	0.24995	0	13.4107
0.99995	1	0.24995	0	13.6255
0.99995	1	0.24995	0	13.9417
0.99995	1	0.24995	0	13.4569
0.99995	1	0.24995	0	13.3233
0.99995	1	0.24995	0	13.536
0.99995	1	0.24995	0	13.3239
0.99995	1	0.24995	0	13.7705
0.99995	1	0.24995	0	13.4757

## Sheet: f6
14.225	1	-6783.58	0	13.3685
14.225	1	-6783.58	0	13.5557
14.225	1	-6783.58	0	13.1332
14.225	1	-6783.58	0	13.072
14.225	1	-6783.58	0	13.3635
14.225	1	-6783.58	0	13.4264
14.225	1	-6783.58	0	12.8957
14.225	1	-6783.58	0	13.52
14.225	1	-6783.58	0	13.4767
14.225	1	-6783.58	0	13.4673
14.225	1	-6783.58	0	12.9657
14.225	1	-6783.58	0	13.3428
14.225	1	-6783.58	0	13.1155
14.225	1	-6783.58	0	13.5462
14.225	1	-6783.58	0	13.173
14.225	1	-6783.58	0	13.0727
14.225	1	-6783.58	0	13.3213
14.225	1	-6783.58	0	13.1229
14.225	1	-6783.58	0	13.2792
14.225	1	-6783.58	0	13.2582
14.225	1	-6783.58	0	13.6239
14.225	1	-6783.58	0	12.8825
14.225	1	-6783.58	0	13.0721
14.225	1	-6783.58	0	12.988
14.225	1	-6783.58	0	13.1479
14.225	1	-6783.58	0	13.1809
14.225	1	-6783.58	0	13.1355
14.225	1	-6783.58	0	13.3272
14.225	1	-6783.58	0	13.0894
14.225	1	-6783.58	0	13.1122

## Sheet: f7
-1.25994	-2.48314	-0.496648	1	1	0.211439	0	19.9998
-1.25994	-2.48314	0.496648	1	-1	0.211439	0	18.9564
-1.25994	-2.48314	0.496648	1	-1	0.211439	0	23.9408
-1.25994	-2.48314	-0.496648	1	1	0.211439	0	16.8946
-1.25994	-2.48314	-0.496648	1	1	0.211439	0	16.6904
-1.25994	-2.48314	-0.496648	1	1	0.211439	0	25.8859
-1.25994	-2.48314	-0.496648	1	1	0.211439	0	29.5526
-1.25994	-2.48314	0.496648	1	-1	0.211439	0	19.9564
-1.25994	-2.48314	-0.496648	1	1	0.211439	0	27.8046
-1.25994	2.48314	-0.496648	1	-1	0.211439	0	23.7032
-1.25994	2.48314	0.496648	1	1	0.211439	0	16.2459
-1.25994	2.48314	-0.496648	1	-1	0.211439	0	28.4846
-1.25994	-2.48314	0.496648	1	-1	0.211439	0	15.6976
-1.25994	2.48314	0.496648	1	1	0.211439	0	26.1593
-1.25994	2.48314	-0.496648	1	-1	0.211439	0	24.3877
-1.25994	-2.48314	0.496648	1	-1	0.211439	0	17.3
-1.25994	2.48314	-0.496648	1	-1	0.211439	0	27.2987
-1.25994	-2.48314	0.496648	1	-1	0.211439	0	16.1169
-1.25994	-2.48314	-0.496648	1	1	0.211439	0	17.0507
-1.25994	-2.48314	0.496648	1	-1	0.211439	0	16.9951
-1.25994	-2.48314	-0.496648	1	1	0.211439	0	23.5343
-1.25994	2.48314	0.496648	1	1	0.211439	0	15.9468
-1.25994	-2.48314	-0.496648	1	1	0.211439	0	16.2116
-1.25994	2.48314	0.496648	1	1	0.211439	0	16.9864
-1.25994	2.48314	0.496648	1	1	0.211439	0	15.5458
-1.25994	2.48314	0.496648	1	1	0.211439	0	26.8625
-1.25994	2.48314	-0.496648	1	-1	0.211439	0	16.7043
-1.25994	2.48314	0.496648	1	1	0.211439	0	16.1817
-1.25994	-1.83817	-0.183827	1	2	0.426784	0	15.7186
-0.0464159	-2.77314	-0.554648	-1	-1	0.931096	0	17.7662

## Sheet: f8
555.554	5000	180	220	400	26	15	14	7055.55	0	57.4321
555.554	5000	180	220	400	26	15	14	7055.55	0	35.0058
555.554	5000	180	220	400	26	15	14	7055.55	0	43.3779
555.554	5000	180	220	400	26	15	14	7055.55	0	40.4574
555.554	5000	180	220	400	26	15	14	7055.55	0	44.2277
555.554	5000	180	220	400	26	15	14	7055.55	0	41.0106
555.554	5000	180	220	400	26	15	14	7055.55	0	48.1206
555.554	5000	180	220	400	26	15	14	7055.55	0	57.26
555.554	5000	180	220	400	26	15	14	7055.55	0	36.261
555.554	5000	180	220	400	26	15	14	7055.55	0	45.3106
555.554	5000	180	220	400	26	15	14	7055.55	0	50.8539
555.554	5000	180	220	400	26	15	14	7055.55	0	33.974
555.554	5000	180	220	400	26	15	14	7055.55	0	38.8988
555.554	5000	180	220	400	26	15	14	7055.55	0	36.6664
555.554	5000	180	220	400	26	15	14	7055.55	0	35.9463
555.554	5000	180	220	400	26	15	14	7055.55	0	37.8943
555.554	5000	180	220	400	26	15	14	7055.55	0	45.174
555.554	5000	180	220	400	26	15	14	7055.55	0	41.9287
555.554	5000	180	220	400	26	15	14	7055.55	0	40.1621
555.554	5000	180	220	400	26	15	14	7055.55	0	36.2808
555.554	5000	180	220	400	26	15	14	7055.55	0	39.9061
555.554	5000	180	220	400	26	15	14	7055.55	0	35.833
555.554	5000	180	220	400	26	15	14	7055.55	0	36.3704
555.554	5000	180	220	400	26	15	14	7055.55	0	46.3528
555.554	5000	180	220	400	26	15	14	7055.55	0	35.0752
555.554	5000	180	220	400	26	15	14	7055.55	0	44.4904
555.554	5000	180	220	400	26	15	14	7055.55	0	35.1432
555.554	5000	180	220	400	26	15	14	7055.55	0	39.8645
555.554	5000	180	220	400	26	15	14	7055.55	0	38.6284
566.665	5500	180.952	219.048	380	3	14	15	7106.67	0	32.5425

## Sheet: f9
833.332	5000	200	200	400	6	6	6	7083.33	0	27.5759
833.332	5000	200	200	400	6	6	6	7083.33	0	27.1345
833.332	5000	200	200	400	6	6	6	7083.33	0	28.0555
833.332	5000	200	200	400	6	6	6	7083.33	0	27.6288
833.332	5000	200	200	400	6	6	6	7083.33	0	28.0835
833.332	5000	200	200	400	6	6	6	7083.33	0	33.6316
833.332	5000	200	200	400	6	6	6	7083.33	0	28.4951
833.332	5000	200	200	400	6	6	6	7083.33	0	28.8251
833.332	5000	200	200	400	6	6	6	7083.33	0	26.8668
833.332	5000	200	200	400	6	6	6	7083.33	0	27.2148
833.332	5000	200	200	400	6	6	6	7083.33	0	30.218
833.332	5000	200	200	400	6	6	6	7083.33	0	27.7224
833.332	5000	200	200	400	6	6	6	7083.33	0	28.197
833.332	5000	200	200	400	6	6	6	7083.33	0	28.9336
833.332	5000	200	200	400	6	6	6	7083.33	0	26.5686
833.332	5000	200	200	400	6	6	6	7083.33	0	28.2763
833.332	5000	200	200	400	6	6	6	7083.33	0	29.2014
833.332	5000	200	200	400	6	6	6	7083.33	0	27.8542
833.332	5000	200	200	400	6	6	6	7083.33	0	28.2802
833.332	5000	200	200	400	6	6	6	7083.33	0	28.9145
833.332	5000	200	200	400	6	6	6	7083.33	0	28.7242
833.332	5000	200	200	400	6	6	6	7083.33	0	28.4105
833.332	5000	200	200	400	6	6	6	7083.33	0	28.0279
833.332	5000	200	200	400	6	6	6	7083.33	0	27.0727
833.332	5000	200	200	400	6	6	6	7083.33	0	29.6728
833.332	5000	200	200	400	6	6	6	7083.33	0	29.9548
833.332	5000	200	200	400	6	6	6	7083.33	0	30.2735
833.332	5000	200	200	400	6	6	6	7083.33	0	27.4624
833.332	5000	200	200	400	6	6	6	7083.33	0	27.4886
833.332	5000	200	200	400	6	6	6	7083.33	0	27.7186

## Sheet: f10
833.332	5000	200	200	400	4	3	3	7133.33	0	27.1201
833.332	5000	200	200	400	4	3	3	7133.33	0	26.7388
833.332	5000	200	200	400	4	3	3	7133.33	0	28.7582
833.332	5000	200	200	400	4	3	3	7133.33	0	27.1243
833.332	5000	200	200	400	4	3	3	7133.33	0	27.7979
833.332	5000	200	200	400	4	3	3	7133.33	0	28.5378
833.332	5000	200	200	400	4	3	3	7133.33	0	26.191
833.332	5000	200	200	400	4	3	3	7133.33	0	26.6964
833.332	5000	200	200	400	4	3	3	7133.33	0	26.4571
833.332	5000	200	200	400	4	3	3	7133.33	0	26.2193
833.332	5000	200	200	400	4	3	3	7133.33	0	27.2999
833.332	5000	200	200	400	4	3	3	7133.33	0	26.505
833.332	5000	200	200	400	4	3	3	7133.33	0	26.3039
833.332	5000	200	200	400	4	3	3	7133.33	0	28.1696
833.332	5000	200	200	400	4	3	3	7133.33	0	27.8464
833.332	5000	200	200	400	4	3	3	7133.33	0	28.849
833.332	5000	200	200	400	4	3	3	7133.33	0	27.7345
833.332	5000	200	200	400	4	3	3	7133.33	0	28.2835
833.332	5000	200	200	400	4	3	3	7133.33	0	26.6074
833.332	5000	200	200	400	4	3	3	7133.33	0	27.8418
833.332	5000	200	200	400	4	3	3	7133.33	0	26.9854
833.332	5000	200	200	400	4	3	3	7133.33	0	27.7523
833.332	5000	200	200	400	4	3	3	7133.33	0	27.8193
833.332	5000	200	200	400	4	3	3	7133.33	0	28.1275
833.332	5000	200	200	400	4	3	3	7133.33	0	27.3182
833.332	5000	200	200	400	4	3	3	7133.33	0	28.4623
833.332	5000	200	200	400	4	3	3	7133.33	0	27.6784
833.332	5000	200	200	400	4	3	3	7133.33	0	27.4281
833.332	5000	200	200	400	4	3	3	7133.33	0	33.9615
833.332	5000	200	200	400	4	3	3	7133.33	0	29.5338

[truncated: 18 more sheets: f11, f12, f13, f14, f15, f16, f17, f18, f19, f20, f21, f22, f23, f24, f25, f26, f27, f28]
