# Supplementary material for: Efficiently handling constraints in mixed-integer nonlinear programming problems using gradient-based repair differential evolution
Source: PeerJ journal article supplement (doi:10.7717/peerj-cs.2095), 2024-05-31
Supplement: Supplemental_File_2.zip [file G_CJADEmi_SOP.xls]

## Sheet: Hoja1
Execution	t1	t2	t3	t4	t5	t6	t7	w1	w2	w3	w4	w5	w6	f(x)	G(x)	Time execution
1	2.70579	15.301	15.9572	32.6424	34.7196	49.786	57.8119	2	2	1	4	1	3	1.37728	0	6510.4
2	2.67471	15.9101	32.4525	34.125	37.3175	49.6483	57.8273	2	1	4	3	1	3	1.35514	0	6185.73
3	2.86448	17.752	31.8462	34.1504	45.3763	58.2174	63.3188	2	1	4	1	3	4	1.41932	0	4975.47
4	2.84373	15.9584	32.5125	33.5047	34.1819	38.9187	56.9977	2	1	4	4	3	1	1.39297	0	5584.98
5	3.27869	18.6081	19.8041	31.9641	34.2858	46.3184	58.1538	2	3	1	4	1	3	1.43887	0	5018.59
6	3.61755	17.2932	32.2219	34.0574	37.5755	50.708	57.7088	2	1	4	3	1	3	1.38022	0	5222.53
7	3.25853	16.8027	16.8124	32.3604	34.2591	38.1289	56.9963	2	3	1	4	3	1	1.41691	0	5737.22
8	3.38967	17.0282	32.1437	33.9581	38.786	56.9927	60.6375	2	1	4	3	1	4	1.4153	0	5369.15
9	2.87425	16.4105	32.4798	34.6159	49.0793	53.4285	57.8465	2	1	4	1	3	3	1.38547	0	4760.74
10	3.37584	17.3193	32.1007	33.9996	36.9035	48.253	57.971	2	1	4	3	1	3	1.38156	0	5070.74
11	2.82728	16.4778	29.6844	32.6519	34.4774	48.6214	57.9394	2	1	3	4	1	3	1.37413	0	5638.19
12	2.86441	16.6814	32.3315	34.4851	47.4009	48.6668	58.0696	2	1	4	1	3	3	1.38745	0	5334.05
13	3.18066	18.2278	25.9727	32.4252	33.813	39.6582	57.11	2	1	3	4	3	1	1.443	0	5152.76
14	2.43899	19.3875	31.4981	33.2485	34.4676	48.3022	57.9709	2	3	3	4	1	3	1.46226	0	5348.37
15	2.71885	15.9777	32.1846	33.8307	38.0864	52.2463	57.5479	2	1	4	3	1	3	1.36847	0	5137.18
16	2.50215	16.623	25.4089	32.687	33.669	38.8485	56.9997	2	1	3	4	3	1	1.39934	0	5684.92
17	2.85307	16.3588	31.8374	33.5863	36.9026	49.6962	57.8209	2	1	4	3	1	3	1.36997	0	5124.13
18	2.51411	3.14465	16.1971	32.3355	34.4292	47.7764	58.0368	2	2	1	4	1	3	1.3843	0	5224.13
19	2.68288	17.1638	26.4812	32.1902	33.8727	48.5664	57.9193	2	1	3	4	1	3	1.3983	0	5638.73
20	3.2353	18.4001	23.8689	33.142	34.6642	36.0614	56.9614	2	1	3	4	3	1	1.45965	0	5288.46
21	2.74626	12.2535	15.753	32.8052	34.904	52.3197	57.5229	2	2	1	4	1	3	1.3845	0	5472.48
22	3.21023	16.6331	32.3306	34.0902	38.9859	57.0044	60.1862	2	1	4	3	1	4	1.40561	0	4979.01
23	2.82709	17.1473	27.3613	32.4796	34.1877	48.0757	58.0041	2	1	3	4	1	3	1.38793	0	5613.71
24	2.62884	17.6974	24.5249	32.851	34.3063	47.2071	58.1014	2	1	3	4	1	3	1.3987	0	5250.3
25	2.84993	16.5356	28.8146	32.8068	34.5426	49.3824	57.8572	2	1	3	4	1	3	1.37389	0	5720.92
26	2.85925	16.8743	25.4021	33.4378	34.4321	38.9474	57.0024	2	1	3	4	3	1	1.39294	0	5292.03
27	2.86565	16.317	16.319	32.3013	34.4367	49.3605	57.8596	2	3	1	4	1	3	1.38558	0	5707.53
28	2.97229	17.2344	25.5261	33.2693	34.7425	50.2368	57.7157	2	1	3	4	1	3	1.38728	0	5541.95
29	2.63395	16.1192	32.5527	34.3972	36.7301	49.4759	57.8429	2	1	4	3	1	3	1.37081	0	5251.68
30	2.86235	17.5917	22.8973	33.5549	34.409	38.9231	57.001	2	1	3	4	3	1	1.4131	0	5656.96
