# Supplementary material for: Efficiently handling constraints in mixed-integer nonlinear programming problems using gradient-based repair differential evolution
Source: PeerJ journal article supplement (doi:10.7717/peerj-cs.2095), 2024-05-31
Supplement: Supplemental_File_2.zip [file G_DEmi.xls]

## Sheet: f1
-1	0	13	0	3.64338
-1	0	13	0	3.80361
-1	0	13	0	4.00504
-1	0	13	0	3.54957
-1	0	13	0	3.43316
-1	0	13	0	3.2801
-1	0	13	0	3.58008
-1	0	13	0	3.25876
-1	0	13	0	3.9632
-1	0	13	0	4.12139
-1	0	13	0	3.99276
-1	0	13	0	3.38694
-1	0	13	0	3.38367
-1	0	13	0	3.33893
-1	0	13	0	3.33931
-1	0	13	0	3.60831
-1	0	13	0	3.19638
-1	0	13	0	3.65883
-1	0	13	0	3.96963
-1	0	13	0	3.27577
-1	0	13	0	3.37667
-1	0	13	0	4.03986
-1	0	13	0	4.00133
-1	0	13	0	3.38316
-1	0	13	0	3.39892
-1	0	13	0	3.38
-1	0	13	0	3.29698
-1	0	13	0	4.02664
-1	0	13	0	3.42941
-1	0	13	0	3.78934

## Sheet: f2
-5.71474e-09	1	1	1	0	4.12419
9.39021e-10	1	1	1	0	3.43318
1.38031e-09	1	1	1	0	3.35295
1.38455e-09	1	1	1	0	3.39028
1.35761e-09	1	1	1	0	3.98234
5.68215e-10	1	1	1	0	3.28605
5.5929e-10	1	1	1	0	3.89177
-6.6748e-09	1	1	1	0	3.30832
2.23806e-09	1	1	1	0	4.03153
7.98193e-09	1	1	1	0	3.81031
9.90644e-09	1	1	1	0	3.4628
-5.29547e-09	1	1	1	0	3.99124
-2.11135e-09	1	1	1	0	3.58805
1.00837e-09	1	1	1	0	3.25818
-5.6636e-09	1	1	1	0	3.42185
1.30561e-09	1	1	1	0	3.98659
-5.33696e-09	1	1	1	0	3.74469
-6.36603e-09	1	1	1	0	3.29989
-1.75433e-09	1	1	1	0	3.68023
2.42544e-09	1	1	1	0	3.99854
1.30551e-09	1	1	1	0	3.29971
-2.03842e-09	1	1	1	0	3.98359
1.36766e-09	1	1	1	0	3.99366
-1.74878e-09	1	1	1	0	3.87233
1.29479e-09	1	1	1	0	3.98811
-4.48319e-09	1	1	1	0	4.04485
1.40679e-09	1	1	1	0	3.28324
2.79377e-09	1	1	1	0	3.41692
-2.35455e-09	1	1	1	0	3.97744
2.66371e-09	1	1	1	0	3.25688

## Sheet: f3
1	3	-4	0	3.32094
1	3	-4	0	4.0302
1	3	-4	0	4.05711
1	3	-4	0	4.04873
1	3	-4	0	4.02285
1	3	-4	0	3.92541
1	3	-4	0	3.25767
1	3	-4	0	4.00251
1	3	-4	0	3.29441
1	3	-4	0	4.0713
1	3	-4	0	3.74296
1	3	-4	0	3.29787
1	3	-4	0	3.273
1	3	-4	0	3.29829
1	3	-4	0	3.988
1	3	-4	0	4.0281
1	3	-4	0	3.24888
1	3	-4	0	3.33081
1	3	-4	0	4.05606
1	3	-4	0	3.28157
1	3	-4	0	4.05429
1	3	-4	0	4.00168
1	3	-4	0	3.27302
1	3	-4	0	4.01703
1	3	-4	0	4.07078
1	3	-4	0	3.26014
1	3	-4	0	4.05632
1	3	-4	0	4.03792
1	3	-4	0	4.01903
1	3	-4	0	3.29094

## Sheet: f4
3	3	-6	0	3.14718
3	3	-6	0	3.15651
3	3	-6	0	3.26899
3	3	-6	0	3.54916
3	3	-6	0	3.1769
3	3	-6	0	3.20154
3	3	-6	0	3.15761
3	3	-6	0	3.89344
3	3	-6	0	3.50635
3	3	-6	0	3.14068
3	3	-6	0	3.88174
3	3	-6	0	3.89156
3	3	-6	0	3.36735
3	3	-6	0	3.89945
3	3	-6	0	3.16594
3	3	-6	0	3.15916
3	3	-6	0	3.55262
3	3	-6	0	3.66547
3	3	-6	0	3.15833
3	3	-6	0	3.62192
3	3	-6	0	3.23229
3	3	-6	0	3.3902
3	3	-6	0	3.27949
3	3	-6	0	3.45752
3	3	-6	0	3.88724
3	3	-6	0	3.59352
3	3	-6	0	3.2015
3	3	-6	0	3.878
3	3	-6	0	3.16999
3	3	-6	0	3.14891

## Sheet: f5
0.99995	1	0.24995	0	3.28322
0.99995	1	0.24995	0	3.21232
0.99995	1	0.24995	0	3.18083
0.99995	1	0.24995	0	3.195
0.99995	1	0.24995	0	3.87476
0.99995	1	0.24995	0	3.87429
0.99995	1	0.24995	0	3.17272
0.99995	1	0.24995	0	3.18357
0.99995	1	0.24995	0	3.43118
1.00005	1	0.25005	0	3.91344
0.99995	1	0.24995	0	3.24571
0.99995	1	0.24995	0	3.22709
0.99995	1	0.24995	0	3.23897
0.99995	1	0.24995	0	3.17255
1.00005	1	0.25005	0	3.183
0.99995	1	0.24995	0	3.88917
0.99995	1	0.24995	0	3.67673
0.99995	1	0.24995	0	3.87721
0.99995	1	0.24995	0	3.91469
0.99995	1	0.24995	0	3.5185
0.99995	1	0.24995	0	3.19845
0.99995	1	0.24995	0	3.20456
0.99995	1	0.24995	0	3.188
0.99995	1	0.24995	0	3.20872
0.99995	1	0.24995	0	3.54529
0.99995	1	0.24995	0	3.19694
0.99995	1	0.24995	0	3.88656
0.99995	1	0.24995	0	3.89618
0.99995	1	0.24995	0	3.88658
0.99995	1	0.24995	0	3.84288

## Sheet: f6
14.225	1	-6783.58	0	3.85483
14.225	1	-6783.58	0	3.26123
14.225	1	-6783.58	0	3.24971
14.225	1	-6783.58	0	3.96271
14.225	1	-6783.58	0	3.99762
14.225	1	-6783.58	0	3.3603
14.225	1	-6783.58	0	3.26714
14.225	1	-6783.58	0	3.33957
14.225	1	-6783.58	0	3.96009
14.225	1	-6783.58	0	3.96691
14.225	1	-6783.58	0	3.97436
14.225	1	-6783.58	0	3.96092
14.225	1	-6783.58	0	3.30796
14.225	1	-6783.58	0	3.98566
14.225	1	-6783.58	0	3.9772
14.225	1	-6783.58	0	3.26501
14.225	1	-6783.58	0	3.24825
14.225	1	-6783.58	0	3.24667
14.225	1	-6783.58	0	3.986
14.225	1	-6783.58	0	3.97902
14.225	1	-6783.58	0	3.95694
14.225	1	-6783.58	0	3.34358
14.225	1	-6783.58	0	3.25396
14.225	1	-6783.58	0	3.27818
14.225	1	-6783.58	0	3.97756
14.225	1	-6783.58	0	3.94721
14.225	1	-6783.58	0	3.23274
14.225	1	-6783.58	0	3.24743
14.225	1	-6783.58	0	3.26606
14.225	1	-6783.58	0	3.24697

## Sheet: f7
-1.25994	-2.48314	0.496648	1	-1	0.211439	0	5.88781
-1.25994	-2.48314	0.496648	1	-1	0.211439	0	6.5671
-1.25994	-2.48314	0.496648	1	-1	0.211439	0	6.20418
-1.25994	-2.48314	-0.496648	1	1	0.211439	0	10.053
-1.25994	-2.48314	0.496648	1	-1	0.211439	0	8.57341
-1.25994	-2.48314	0.496648	1	-1	0.211439	0	6.23333
-1.25994	2.48314	0.496648	1	1	0.211439	0	5.75049
-1.25994	2.48314	0.496648	1	1	0.211439	0	9.9108
-1.25994	-2.48314	-0.496648	1	1	0.211439	0	6.11243
-1.25994	-2.48314	0.496648	1	-1	0.211439	0	6.08624
-1.25994	-2.48314	-0.496648	1	1	0.211439	0	6.56904
-1.25994	-2.48314	0.496648	1	-1	0.211439	0	8.97132
-1.25994	2.48314	0.496648	1	1	0.211439	0	5.79601
-1.25994	-2.48314	-0.496648	1	1	0.211439	0	6.99123
-1.25994	-2.48314	-0.496648	1	1	0.211439	0	6.38663
-1.25994	2.48314	-0.496648	1	-1	0.211439	0	10.4821
-1.25994	2.48314	-0.496648	1	-1	0.211439	0	6.26113
-1.25994	2.48314	0.496648	1	1	0.211439	0	9.956
-1.25994	2.48314	-0.496648	1	-1	0.211439	0	6.29802
-1.25994	2.48314	-0.496648	1	-1	0.211439	0	5.95852
-1.25994	-2.48314	-0.496648	1	1	0.211439	0	10.2699
-1.25994	-2.48314	0.496648	1	-1	0.211439	0	5.86289
-1.25994	-2.48314	-0.496648	1	1	0.211439	0	9.72185
-1.25994	2.48314	-0.496648	1	-1	0.211439	0	5.65645
-1.25994	2.48314	0.496648	1	1	0.211439	0	5.83837
-1.25994	-2.48314	0.496648	1	-1	0.211439	0	6.52761
-1.25994	-2.48314	-0.496648	1	1	0.211439	0	10.5804
-1.25994	2.48314	0.496648	1	1	0.211439	0	6.45548
-1.25994	-2.48314	0.496648	1	-1	0.211439	0	7.55426
-1.25994	2.48314	-0.496648	1	-1	0.211439	0	10.0008

## Sheet: f8
833.332	5000	200	200	400	14	15	15	7093.33	0	15.5319
555.554	5000	180	220	400	26	15	14	7055.55	0	13.2267
555.554	5000	180	220	400	26	15	14	7055.55	0	17.7588
555.554	5000	180	220	400	26	15	14	7055.55	0	12.3597
555.554	5000	180	220	400	26	15	14	7055.55	0	12.6182
555.554	5000	180	220	400	26	15	14	7055.55	0	12.7959
555.554	5000	180	220	400	26	15	14	7055.55	0	9.64564
555.554	5000	180	220	400	26	15	14	7055.55	0	15.842
555.554	5000	180	220	400	26	15	14	7055.55	0	16.079
555.554	5000	180	220	400	26	15	14	7055.55	0	17.1772
555.554	5000	180	220	400	26	15	14	7055.55	0	12.5354
555.554	5000	180	220	400	26	15	14	7055.55	0	10.4864
555.554	5000	180	220	400	26	15	14	7055.55	0	15.1499
555.554	5000	180	220	400	26	15	14	7055.55	0	14.9775
555.554	5000	180	220	400	26	15	14	7055.55	0	13.8224
555.554	5000	180	220	400	26	15	14	7055.55	0	15.4124
555.554	5000	180	220	400	26	15	14	7055.55	0	12.2305
555.554	5000	180	220	400	26	15	14	7055.55	0	23.3879
555.554	5000	180	220	400	26	15	14	7055.55	0	19.4863
555.554	5000	180	220	400	26	15	14	7055.55	0	18.5893
555.554	5000	180	220	400	26	15	14	7055.55	0	12.471
555.554	5000	180	220	400	26	15	14	7055.55	0	18.9416
555.554	5000	180	220	400	26	15	14	7055.55	0	14.0356
555.554	5000	180	220	400	26	15	14	7055.55	0	14.2167
555.554	5000	180	220	400	26	15	14	7055.55	0	13.6198
555.554	5000	180	220	400	26	15	14	7055.55	0	14.35
555.554	5000	180	220	400	26	15	14	7055.55	0	14.4006
555.554	5000	180	220	400	26	15	14	7055.55	0	23.991
555.554	5000	180	220	400	26	15	14	7055.55	0	13.1731
555.554	5000	180	220	400	26	15	14	7055.55	0	16.9215

## Sheet: f9
833.332	5000	200	200	400	6	6	6	7083.33	0	12.0164
833.332	5000	200	200	400	6	6	6	7083.33	0	8.33484
833.332	5000	200	200	400	6	6	6	7083.33	0	8.6142
833.332	5000	200	200	400	6	6	6	7083.33	0	7.47025
833.332	5000	200	200	400	6	6	6	7083.33	0	8.94802
833.332	5000	200	200	400	6	6	6	7083.33	0	9.89281
833.332	5000	200	200	400	6	6	6	7083.33	0	8.291
833.332	5000	200	200	400	6	6	6	7083.33	0	9.16997
833.332	5000	200	200	400	6	6	6	7083.33	0	8.77722
833.332	5000	200	200	400	6	6	6	7083.33	0	8.946
833.332	5000	200	200	400	6	6	6	7083.33	0	9.56111
833.332	5000	200	200	400	6	6	6	7083.33	0	8.11499
833.332	5000	200	200	400	6	6	6	7083.33	0	7.95881
833.332	5000	200	200	400	6	6	6	7083.33	0	9.29193
833.332	5000	200	200	400	6	6	6	7083.33	0	8.59805
833.332	5000	200	200	400	6	6	6	7083.33	0	8.04577
833.332	5000	200	200	400	6	6	6	7083.33	0	7.98066
833.332	5000	200	200	400	6	6	6	7083.33	0	7.26705
833.332	5000	200	200	400	6	6	6	7083.33	0	8.92185
833.332	5000	200	200	400	6	6	6	7083.33	0	8.64945
833.332	5000	200	200	400	6	6	6	7083.33	0	7.84835
833.332	5000	200	200	400	6	6	6	7083.33	0	9.5143
833.332	5000	200	200	400	6	6	6	7083.33	0	10.2376
833.332	5000	200	200	400	6	6	6	7083.33	0	8.14634
833.332	5000	200	200	400	6	6	6	7083.33	0	7.54877
833.332	5000	200	200	400	6	6	6	7083.33	0	9.38928
833.332	5000	200	200	400	6	6	6	7083.33	0	9.2969
833.332	5000	200	200	400	6	6	6	7083.33	0	8.16999
833.332	5000	200	200	400	6	6	6	7083.33	0	8.49691
833.332	5000	200	200	400	6	6	6	7083.33	0	8.01066

## Sheet: f10
833.332	5000	200	200	400	4	3	3	7133.33	0	6.92529
833.332	5000	200	200	400	4	3	3	7133.33	0	7.55025
833.332	5000	200	200	400	4	3	3	7133.33	0	7.63688
833.332	5000	200	200	400	4	3	3	7133.33	0	8.03831
833.332	5000	200	200	400	4	3	3	7133.33	0	7.96597
833.332	5000	200	200	400	4	3	3	7133.33	0	7.18932
833.332	5000	200	200	400	4	3	3	7133.33	0	10.1151
833.332	5000	200	200	400	4	3	3	7133.33	0	8.30939
833.332	5000	200	200	400	4	3	3	7133.33	0	9.10829
833.332	5000	200	200	400	4	3	3	7133.33	0	7.41365
833.332	5000	200	200	400	4	3	3	7133.33	0	6.65845
833.332	5000	200	200	400	4	3	3	7133.33	0	7.94848
833.332	5000	200	200	400	4	3	3	7133.33	0	8.96071
833.332	5000	200	200	400	4	3	3	7133.33	0	7.67209
833.332	5000	200	200	400	4	3	3	7133.33	0	8.4882
833.332	5000	200	200	400	4	3	3	7133.33	0	7.82909
833.332	5000	200	200	400	4	3	3	7133.33	0	7.38532
833.332	5000	200	200	400	4	3	3	7133.33	0	7.51636
833.332	5000	200	200	400	4	3	3	7133.33	0	7.58223
833.332	5000	200	200	400	4	3	3	7133.33	0	7.92355
833.332	5000	200	200	400	4	3	3	7133.33	0	9.16662
833.332	5000	200	200	400	4	3	3	7133.33	0	7.47704
833.332	5000	200	200	400	4	3	3	7133.33	0	11.7218
833.332	5000	200	200	400	4	3	3	7133.33	0	7.15521
833.332	5000	200	200	400	4	3	3	7133.33	0	7.81427
833.332	5000	200	200	400	4	3	3	7133.33	0	7.4499
833.332	5000	200	200	400	4	3	3	7133.33	0	8.75348
833.332	5000	200	200	400	4	3	3	7133.33	0	9.81717
833.332	5000	200	200	400	4	3	3	7133.33	0	6.89203
833.332	5000	200	200	400	4	3	3	7133.33	0	9.00091

[truncated: 18 more sheets: f11, f12, f13, f14, f15, f16, f17, f18, f19, f20, f21, f22, f23, f24, f25, f26, f27, f28]
