# Supplementary material for: Efficiently handling constraints in mixed-integer nonlinear programming problems using gradient-based repair differential evolution
Source: PeerJ journal article supplement (doi:10.7717/peerj-cs.2095), 2024-05-31
Supplement: Supplemental_File_2.zip [file G_DEmi_S.xlsx]

## Sheet: f1
-1	0	13	0	5.19929
-1	0	13	0	5.38258
-1	0	13	0	5.11581
-1	0	13	0	4.80106
-1	0	13	0	4.36693
-1	0	13	0	5.08954
-1	0	13	0	4.6146
-1	0	13	0	4.77777
-1	0	13	0	5.1401
-1	0	13	0	4.69701
-1	0	13	0	4.64092
-1	0	13	0	5.01522
-1	0	13	0	4.78309
-1	0	13	0	4.9321
-1	0	13	0	4.9557
-1	0	13	0	5.13659
-1	0	13	0	4.67642
-1	0	13	0	4.82075
-1	0	13	0	4.80971
-1	0	13	0	5.20304
-1	0	13	0	4.47072
-1	0	13	0	4.73492
-1	0	13	0	4.85473
-1	0	13	0	4.80529
-1	0	13	0	4.85632
-1	0	13	0	4.68722
-1	0	13	0	4.51634
-1	0	13	0	4.85834
-1	0	13	0	5.10055
-1	0	13	0	4.99657

## Sheet: f2
1.6303e-09	1	1	1	0	10.5718
2.19443e-09	1	1	1	0	10.6032
3.36433e-09	1	1	1	0	10.4191
9.49478e-10	1	1	1	0	11.1059
5.36729e-09	1	1	1	0	10.8344
-1.42784e-09	1	1	1	0	11.1108
-6.06926e-09	1	1	1	0	10.6196
6.97525e-09	1	1	1	0	10.5558
-7.30925e-09	1	1	1	0	10.5349
7.91474e-09	1	1	1	0	10.5876
-1.50022e-09	1	1	1	0	11.021
-7.53148e-09	1	1	1	0	10.9491
-1.69467e-09	1	1	1	0	10.7191
6.42947e-09	1	1	1	0	10.6765
-6.07675e-09	1	1	1	0	10.696
9.51311e-09	1	1	1	0	10.6406
-5.55625e-09	1	1	1	0	10.7097
8.07175e-10	1	1	1	0	10.7031
-2.87287e-09	1	1	1	0	10.6539
-2.48617e-09	1	1	1	0	10.6331
5.46607e-09	1	1	1	0	11.0534
6.08285e-09	1	1	1	0	4.563
-2.80596e-09	1	1	1	0	10.6011
5.39116e-09	1	1	1	0	4.45642
6.82629e-09	1	1	1	0	10.4542
5.26544e-09	1	1	1	0	10.6627
3.28634e-09	1	1	1	0	10.9098
7.12111e-09	1	1	1	0	10.9718
-5.42391e-09	1	1	1	0	10.4846
-4.00963e-09	1	1	1	0	10.575

## Sheet: f3
1	3	-4	0	10.8899
1	3	-4	0	11.2453
1	3	-4	0	11.4187
1	3	-4	0	11.0089
1	3	-4	0	11.0109
1	3	-4	0	10.6298
1	3	-4	0	11.0906
1	3	-4	0	11.129
1	3	-4	0	10.7342
1	3	-4	0	11.0425
1	3	-4	0	10.6222
1	3	-4	0	10.6652
1	3	-4	0	11.0415
1	3	-4	0	10.7808
1	3	-4	0	11.0098
1	3	-4	0	10.6242
1	3	-4	0	10.6654
1	3	-4	0	10.9382
1	3	-4	0	11.0037
1	3	-4	0	11.0783
1	3	-4	0	11.6969
1	3	-4	0	11.2616
1	3	-4	0	10.827
1	3	-4	0	11.2447
1	3	-4	0	11.0966
1	3	-4	0	10.889
1	3	-4	0	10.9134
1	3	-4	0	10.7072
1	3	-4	0	10.752
1	3	-4	0	10.8894

## Sheet: f4
3	3	-6	0	10.2313
3	3	-6	0	10.0518
3	3	-6	0	10.1667
3	3	-6	0	10.3632
3	3	-6	0	10.7024
3	3	-6	0	10.2456
3	3	-6	0	10.3664
3	3	-6	0	10.8734
3	3	-6	0	10.1914
3	3	-6	0	10.2398
3	3	-6	0	10.2933
3	3	-6	0	10.1405
3	3	-6	0	10.4664
3	3	-6	0	10.4963
3	3	-6	0	10.7513
3	3	-6	0	10.2138
3	3	-6	0	10.1174
3	3	-6	0	10.0883
3	3	-6	0	10.2954
3	3	-6	0	10.6816
3	3	-6	0	10.28
3	3	-6	0	10.39
3	3	-6	0	10.1872
3	3	-6	0	10.7173
3	3	-6	0	10.0928
3	3	-6	0	10.2725
3	3	-6	0	10.3777
3	3	-6	0	10.4012
3	3	-6	0	10.2117
3	3	-6	0	10.1346

## Sheet: f5
0.99995	1	0.24995	0	10.628
0.99995	1	0.24995	0	10.1565
0.99995	1	0.24995	0	10.3558
0.99995	1	0.24995	0	10.1242
0.99995	1	0.24995	0	10.2869
0.99995	1	0.24995	0	10.1135
0.99995	1	0.24995	0	10.3624
0.99995	1	0.24995	0	10.1513
0.99995	1	0.24995	0	10.1355
0.99995	1	0.24995	0	10.247
0.99995	1	0.24995	0	10.2332
0.99995	1	0.24995	0	10.6482
0.99995	1	0.24995	0	10.2041
0.99995	1	0.24995	0	10.3062
0.99995	1	0.24995	0	10.1067
0.99995	1	0.24995	0	10.4727
0.99995	1	0.24995	0	10.9898
0.99995	1	0.24995	0	10.2785
0.99995	1	0.24995	0	10.316
0.99995	1	0.24995	0	9.97467
0.99995	1	0.24995	0	10.1309
0.99995	1	0.24995	0	10.4364
0.99995	1	0.24995	0	10.8045
0.99995	1	0.24995	0	10.9058
0.99995	1	0.24995	0	10.1367
0.99995	1	0.24995	0	10.1623
0.99995	1	0.24995	0	10.3675
0.99995	1	0.24995	0	10.5644
0.99995	1	0.24995	0	10.3479
0.99995	1	0.24995	0	10.0257

## Sheet: f6
14.225	1	-6783.58	0	10.4035
14.225	1	-6783.58	0	10.3003
14.225	1	-6783.58	0	10.5405
14.225	1	-6783.58	0	10.6834
14.225	1	-6783.58	0	10.8554
14.225	1	-6783.58	0	10.3407
14.225	1	-6783.58	0	11.2129
14.225	1	-6783.58	0	10.5071
14.225	1	-6783.58	0	10.383
14.225	1	-6783.58	0	10.8725
14.225	1	-6783.58	0	10.596
14.225	1	-6783.58	0	10.5302
14.225	1	-6783.58	0	10.5417
14.225	1	-6783.58	0	10.4865
14.225	1	-6783.58	0	10.2612
14.225	1	-6783.58	0	10.2806
14.225	1	-6783.58	0	10.5493
14.225	1	-6783.58	0	10.2709
14.225	1	-6783.58	0	10.3218
14.225	1	-6783.58	0	10.3833
14.225	1	-6783.58	0	11.5871
14.225	1	-6783.58	0	10.4473
14.225	1	-6783.58	0	10.3567
14.225	1	-6783.58	0	10.5006
14.225	1	-6783.58	0	10.8595
14.225	1	-6783.58	0	10.5804
14.225	1	-6783.58	0	10.3572
14.225	1	-6783.58	0	10.5969
14.225	1	-6783.58	0	10.9136
14.225	1	-6783.58	0	10.9634

## Sheet: f7
-1.25994	-2.48314	0.496648	1	-1	0.211439	0	17.9949
-1.25994	-2.48314	-0.496648	1	1	0.211439	0	20.3553
-1.25994	-2.48314	-0.496648	1	1	0.211439	0	17.2753
-1.25994	2.48314	-0.496648	1	-1	0.211439	0	18.2185
-1.25994	2.48314	0.496648	1	1	0.211439	0	19.6357
-1.25994	-2.48314	0.496648	1	-1	0.211439	0	20.6844
-1.25994	2.48314	0.496648	1	1	0.211439	0	18.1116
-1.25994	2.48314	0.496648	1	1	0.211439	0	25.8577
-1.25994	-2.48314	0.496648	1	-1	0.211439	0	15.6519
-1.25994	-2.48314	0.496648	1	-1	0.211439	0	18.8568
-1.25994	-2.48314	0.496648	1	-1	0.211439	0	19.234
-1.25994	2.48314	-0.496648	1	-1	0.211439	0	18.7582
-1.25994	2.48314	0.496648	1	1	0.211439	0	16.2414
-1.25994	-2.48314	-0.496648	1	1	0.211439	0	21.2852
-1.25994	2.48314	-0.496648	1	-1	0.211439	0	19.5038
-1.25994	2.48314	-0.496648	1	-1	0.211439	0	20.0679
-1.25994	2.48314	0.496648	1	1	0.211439	0	16.8298
-1.25994	2.48314	0.496648	1	1	0.211439	0	18.9815
-1.25994	-2.48314	0.496648	1	-1	0.211439	0	14.5649
-1.25994	2.48314	0.496648	1	1	0.211439	0	17.4832
-1.25994	-2.48314	-0.496648	1	1	0.211439	0	18.1959
-1.25994	2.48314	0.496648	1	1	0.211439	0	17.7071
-1.25994	2.48314	-0.496648	1	-1	0.211439	0	17.3198
-1.25994	2.48314	-0.496648	1	-1	0.211439	0	16.025
-1.25994	-2.48314	-0.496648	1	1	0.211439	0	16.5566
-1.25994	-2.48314	0.496648	1	-1	0.211439	0	17.7074
-1.25994	-2.48314	0.496648	1	-1	0.211439	0	18.6085
-1.25994	2.48314	-0.496648	1	-1	0.211439	0	19.1752
-1.25994	-2.48314	0.496648	1	-1	0.211439	0	19.1409
-1.25994	2.48314	0.496648	1	1	0.211439	0	21.002

## Sheet: f8
555.554	5000	180	220	400	26	15	14	7055.55	0	26.4865
555.554	5000	180	220	400	26	15	14	7055.55	0	26.8438
555.554	5000	180	220	400	26	15	14	7055.55	0	32.2853
555.554	5000	180	220	400	26	15	14	7055.55	0	33.8384
555.554	5000	180	220	400	26	15	14	7055.55	0	28.9481
555.554	5000	180	220	400	26	15	14	7055.55	0	32.694
555.554	5000	180	220	400	26	15	14	7055.55	0	36.6844
555.554	5000	180	220	400	26	15	14	7055.55	0	39.0962
555.554	5000	180	220	400	26	15	14	7055.55	0	31.7771
555.554	5000	180	220	400	26	15	14	7055.55	0	28.2464
555.554	5000	180	220	400	26	15	14	7055.55	0	27.6553
555.554	5000	180	220	400	26	15	14	7055.55	0	44.8582
555.554	5000	180	220	400	26	15	14	7055.55	0	27.4233
555.554	5000	180	220	400	26	15	14	7055.55	0	27.0411
555.554	5000	180	220	400	26	15	14	7055.55	0	30.1154
555.554	5000	180	220	400	26	15	14	7055.55	0	27.0626
555.554	5000	180	220	400	26	15	14	7055.55	0	27.2192
555.554	5000	180	220	400	26	15	14	7055.55	0	26.0652
555.554	5000	180	220	400	26	15	14	7055.55	0	28.6895
555.554	5000	180	220	400	26	15	14	7055.55	0	26.1509
555.554	5000	180	220	400	26	15	14	7055.55	0	38.6685
555.554	5000	180	220	400	26	15	14	7055.55	0	38.359
555.554	5000	180	220	400	26	15	14	7055.55	0	29.0233
555.554	5000	180	220	400	26	15	14	7055.55	0	48.5474
555.554	5000	180	220	400	26	15	14	7055.55	0	48.2179
555.554	5000	180	220	400	26	15	14	7055.55	0	30.5951
555.554	5000	180	220	400	26	15	14	7055.55	0	29.0241
555.554	5000	180	220	400	26	15	14	7055.55	0	35.5101
555.554	5000	180	220	400	26	15	14	7055.55	0	30.1607
555.554	5000	180	220	400	26	15	14	7055.55	0	32.6056

## Sheet: f9
833.332	5000	200	200	400	6	6	6	7083.33	0	23.3865
833.332	5000	200	200	400	6	6	6	7083.33	0	22.1447
833.332	5000	200	200	400	6	6	6	7083.33	0	22.3465
833.332	5000	200	200	400	6	6	6	7083.33	0	22.1074
833.332	5000	200	200	400	6	6	6	7083.33	0	23.7571
833.332	5000	200	200	400	6	6	6	7083.33	0	27.6211
833.332	5000	200	200	400	6	6	6	7083.33	0	23.3076
833.332	5000	200	200	400	6	6	6	7083.33	0	25.7086
833.332	5000	200	200	400	6	6	6	7083.33	0	26.6756
833.332	5000	200	200	400	6	6	6	7083.33	0	24.9079
833.332	5000	200	200	400	6	6	6	7083.33	0	27.9899
833.332	5000	200	200	400	6	6	6	7083.33	0	26.0806
833.332	5000	200	200	400	6	6	6	7083.33	0	30.5851
833.332	5000	200	200	400	6	6	6	7083.33	0	25.9318
833.332	5000	200	200	400	6	6	6	7083.33	0	23.3515
833.332	5000	200	200	400	6	6	6	7083.33	0	24.9498
833.332	5000	200	200	400	6	6	6	7083.33	0	25.6966
833.332	5000	200	200	400	6	6	6	7083.33	0	26.7348
833.332	5000	200	200	400	6	6	6	7083.33	0	22.7695
833.332	5000	200	200	400	6	6	6	7083.33	0	23.0504
833.332	5000	200	200	400	6	6	6	7083.33	0	22.6179
833.332	5000	200	200	400	6	6	6	7083.33	0	23.9887
833.332	5000	200	200	400	6	6	6	7083.33	0	24.222
833.332	5000	200	200	400	6	6	6	7083.33	0	25.4803
833.332	5000	200	200	400	6	6	6	7083.33	0	30.5401
833.332	5000	200	200	400	6	6	6	7083.33	0	24.0153
833.332	5000	200	200	400	6	6	6	7083.33	0	24.8371
833.332	5000	200	200	400	6	6	6	7083.33	0	24.3975
833.332	5000	200	200	400	6	6	6	7083.33	0	26.4103
833.332	5000	200	200	400	6	6	6	7083.33	0	27.8876

## Sheet: f10
833.332	5000	200	200	400	4	3	3	7133.33	0	23.6622
833.332	5000	200	200	400	4	3	3	7133.33	0	23.7825
833.332	5000	200	200	400	4	3	3	7133.33	0	23.7094
833.332	5000	200	200	400	4	3	3	7133.33	0	31.6423
833.332	5000	200	200	400	4	3	3	7133.33	0	21.404
833.332	5000	200	200	400	4	3	3	7133.33	0	28.7465
833.332	5000	200	200	400	4	3	3	7133.33	0	24.1601
833.332	5000	200	200	400	4	3	3	7133.33	0	22.4521
833.332	5000	200	200	400	4	3	3	7133.33	0	22.2252
833.332	5000	200	200	400	4	3	3	7133.33	0	26.4335
833.332	5000	200	200	400	4	3	3	7133.33	0	22.9618
833.332	5000	200	200	400	4	3	3	7133.33	0	25.8564
833.332	5000	200	200	400	4	3	3	7133.33	0	22.448
833.332	5000	200	200	400	4	3	3	7133.33	0	25.7514
833.332	5000	200	200	400	4	3	3	7133.33	0	24.0628
833.332	5000	200	200	400	4	3	3	7133.33	0	27.8901
833.332	5000	200	200	400	4	3	3	7133.33	0	22.7642
833.332	5000	200	200	400	4	3	3	7133.33	0	31.9319
833.332	5000	200	200	400	4	3	3	7133.33	0	31.5883
833.332	5000	200	200	400	4	3	3	7133.33	0	26.0946
833.332	5000	200	200	400	4	3	3	7133.33	0	22.8401
833.332	5000	200	200	400	4	3	3	7133.33	0	22.1214
833.332	5000	200	200	400	4	3	3	7133.33	0	24.8295
833.332	5000	200	200	400	4	3	3	7133.33	0	24.9027
833.332	5000	200	200	400	4	3	3	7133.33	0	24.569
833.332	5000	200	200	400	4	3	3	7133.33	0	23.3211
833.332	5000	200	200	400	4	3	3	7133.33	0	24.903
833.332	5000	200	200	400	4	3	3	7133.33	0	26.9308
833.332	5000	200	200	400	4	3	3	7133.33	0	24.5339
833.332	5000	200	200	400	4	3	3	7133.33	0	32.6907

[truncated: 18 more sheets: f11, f12, f13, f14, f15, f16, f17, f18, f19, f20, f21, f22, f23, f24, f25, f26, f27, f28]
