# Supplementary material for: Efficiently handling constraints in mixed-integer nonlinear programming problems using gradient-based repair differential evolution
Source: PeerJ journal article supplement (doi:10.7717/peerj-cs.2095), 2024-05-31
Supplement: Supplemental_File_2.zip [file G_DEmi_S_SOP.xls]

## Sheet: Hoja1
Execution	t1	t2	t3	t4	t5	t6	t7	w1	w2	w3	w4	w5	w6	f(x)	G(x)	Time execution
1	2.46432	16.6337	32.2107	34.4389	49.47	57.4997	58.177	2	1	4	1	3	4	1.41989	0	2735.48
2	2.81706	16.2369	32.5774	34.7373	51.1564	57.515	59.7869	2	1	4	1	3	4	1.39474	0	1698.85
3	3.05169	16.7094	31.695	33.5851	36.6537	52.1071	57.5007	2	1	4	3	1	3	1.39483	0	2232.51
4	3.30014	16.7562	32.6282	34.832	51.0816	54.2885	57.6443	2	1	4	1	3	3	1.39406	0	1579.98
5	2.79856	19.4841	33.5051	34.7776	50.6905	57.4793	57.7249	2	3	4	1	3	3	1.46469	0	3526.27
6	3.37368	17.7213	17.8933	32.2161	34.6715	52.3429	57.3814	2	3	1	4	1	3	1.44397	0	1641.8
7	2.86559	16.6219	30.557	32.4368	34.4707	51.2482	57.4558	2	1	3	4	1	3	1.40163	0	2103.96
8	2.86388	16.4531	32.4767	34.3388	37.9435	51.6002	57.705	2	1	4	3	1	3	1.38319	0	2389.9
9	3.60916	17.2858	32.3995	32.5569	34.8649	52.4702	57.49	2	1	3	4	1	3	1.41436	0	2062.47
10	3.19724	16.5624	32.4209	34.6366	52.0616	56.2536	57.363	2	1	4	1	3	1	1.40742	0	2171.98
11	3.40728	18.4853	31.8404	34.2486	46.1274	54.2328	58.1107	2	1	4	1	3	3	1.43286	0	2272.75
12	3.18669	17.08	32.372	34.6144	46.781	49.1474	57.7957	2	1	4	1	1	3	1.40106	0	1899.25
13	2.857	17.4023	18.9291	32.3871	34.5983	49.7547	57.676	2	3	1	4	1	3	1.42859	0	2046.47
14	2.96466	16.7132	32.4211	34.6829	50.1548	55.9654	57.7847	2	1	4	1	3	3	1.4025	0	2195.49
15	2.53142	19.4115	33.3786	34.5867	48.1762	57.047	57.9826	2	3	4	1	3	3	1.45786	0	4156.24
16	3.6076	17.2301	32.1423	33.9511	38.1122	52.3189	57.5353	2	1	4	3	1	3	1.38684	0	1812.28
17	3.36359	18.9321	23.1433	26.9987	33.1791	34.8722	56.9919	2	1	3	3	4	1	1.48074	0	2301.5
18	2.67155	16.2385	32.2964	34.1552	36.3641	49.5421	57.7512	2	1	4	3	1	3	1.37571	0	2396.1
19	2.94212	7.1042	16.809	28.6888	32.8673	34.8548	57.0035	2	2	1	3	4	1	1.43755	0	1894.34
20	3.28027	15.7981	17.7815	30.8259	33.2971	52.1589	57.5378	2	2	1	4	1	3	1.45348	0	1932.9
21	2.76195	16.5381	19.4568	32.3445	34.6986	52.5929	57.5665	2	1	1	4	1	3	1.42231	0	1955.94
22	3.14351	16.5968	32.5445	34.7252	48.8677	50.5335	57.6826	2	1	4	1	1	3	1.39118	0	2490.58
23	2.61459	16.0877	25.9769	31.9611	32.6195	34.8633	56.9748	2	1	1	3	4	1	1.43749	0	1990.2
24	3.01996	17.8074	31.9061	34.3406	48.324	57.7708	57.824	2	1	4	1	3	2	1.43988	0	2281.49
25	2.63675	15.9389	32.3568	34.4611	50.3802	57.0732	57.7451	2	1	4	1	3	3	1.38562	0	2135.35
26	3.25012	11.8834	16.9558	32.4014	34.6796	51.8411	57.4121	2	2	1	4	1	3	1.41272	0	2341.05
27	3.06979	17.2552	28.1909	32.089	33.9977	50.5839	57.6847	2	1	3	4	1	3	1.40643	0	2225.58
28	3.9468	19.4535	20.0382	31.447	34.1192	47.8827	57.6876	2	2	1	4	1	3	1.48854	0	2512.22
29	3.15445	17.2447	29.5674	32.6454	34.5439	47.8482	58.0262	2	1	3	4	1	3	1.3841	0	1838.19
30	3.40712	17.8255	27.3982	32.8549	34.1277	34.8413	56.9714	2	1	3	4	4	1	1.4551	0	2288.17
