# Supplementary material for: Efficiently handling constraints in mixed-integer nonlinear programming problems using gradient-based repair differential evolution
Source: PeerJ journal article supplement (doi:10.7717/peerj-cs.2095), 2024-05-31
Supplement: Supplemental_File_2.zip [file G_DEmi_SOP.xls]

## Sheet: Hoja1
Execution	t1	t2	t3	t4	t5	t6	t7	w1	w2	w3	w4	w5	w6	f(x)	G(x)	Time execution
1	2.52401	16.6081	19.2836	30.387	31.97	38.9638	57.0022	2	1	1	4	3	1	1.42603	0	4002.22
2	2.4913	17.1781	30.8052	33.1545	49.4586	57.7634	59.1363	2	1	4	1	3	4	1.44169	0	3470.2
3	2.71215	12.9293	16.6561	31.7282	33.9719	50.4837	57.62	2	2	1	4	1	3	1.41421	0	3773.14
4	2.7564	15.9107	32.3232	34.3288	47.3961	51.1364	57.2217	2	1	4	1	3	1	1.39999	0	3472.39
5	3.50606	18.8543	27.5911	31.2186	33.4227	50.4349	57.6031	2	1	3	4	1	3	1.4586	0	3075.01
6	3.17793	17.4698	25.9453	32.7344	33.9431	38.6229	56.9917	2	1	3	4	3	1	1.41154	0	3515.93
7	2.80409	16.1574	32.0906	33.7554	37.7164	51.3848	57.5712	2	1	4	3	1	3	1.36871	0	3140.87
8	2.80578	17.4736	27.2801	32.2782	34.07	48.2907	57.8514	2	1	3	4	1	3	1.40549	0	3458.14
9	2.67042	16.4712	31.8795	32.0661	34.217	48.4496	57.9605	2	1	1	4	1	3	1.39222	0	3338.93
10	3.06386	18.0486	28.6642	31.4735	33.6062	48.6146	57.7752	2	1	3	4	1	3	1.43356	0	3248.93
11	3.11459	17.3505	21.6894	31.8246	34.0904	47.7208	58.0433	2	1	1	4	1	3	1.40676	0	3999.59
12	3.03692	17.3391	26.4844	32.449	34.1404	50.2657	57.7581	2	1	3	4	1	3	1.39854	0	3869.3
13	2.84767	17.1344	27.9608	31.4359	33.434	51.8727	57.5772	2	1	3	4	1	3	1.42309	0	3092.12
14	2.43692	16.7712	29.9072	31.4716	38.5244	38.5779	57.0018	2	1	4	3	4	1	1.43861	0	3536.33
15	2.85105	17.5852	26.0709	32.0764	33.7903	48.4072	57.9612	2	1	3	4	1	3	1.40594	0	3331.73
16	2.50198	15.6838	32.3329	34.1639	36.6585	53.5297	57.3813	2	1	4	3	1	3	1.38603	0	2952.64
17	2.75698	16.562	31.7473	33.9506	49.7168	57.8146	58.0339	2	1	4	1	3	4	1.403	0	3439
18	3.33744	17.0972	31.6915	33.509	37.2325	50.8512	57.6894	2	1	4	3	1	3	1.3848	0	3493.02
19	3.49893	17.3082	31.9092	33.7355	38.0527	51.9599	57.5736	2	1	4	3	1	3	1.39136	0	3538.2
20	3.0353	16.7374	31.8158	34.1022	52.3842	57.4741	62.6002	2	1	4	1	3	4	1.41851	0	3099.18
21	2.86063	16.901	18.6744	31.5803	33.8431	49.7796	57.7593	2	1	1	4	1	3	1.41357	0	3567.81
22	2.57663	16.3247	17.5569	31.8163	34.002	50.1489	57.7152	2	1	1	4	1	3	1.4048	0	3212.1
23	3.41259	15.4788	16.7903	32.6507	34.882	51.9429	57.5547	2	2	1	4	1	3	1.39918	0	3771.33
24	2.91648	16.7193	28.5637	32.2781	34.1866	53.2766	57.3972	2	1	3	4	1	3	1.4094	0	3189.08
25	3.33674	18.0476	31.0129	32.9304	36.8053	47.9127	57.9766	2	1	4	3	1	3	1.40714	0	3441.07
26	2.63817	16.5	31.2585	32.9726	38.2301	54.0123	57.3745	2	1	4	3	1	3	1.40298	0	3330.26
27	3.21544	17.0641	30.0708	32.6575	34.3103	34.8152	56.9999	2	1	3	4	4	1	1.44173	0	4269.07
28	3.17301	16.8728	32.4461	33.1391	34.662	49.4173	57.8213	2	1	4	4	1	3	1.39464	0	3097.72
29	3.308	17.1541	30.5854	32.1923	34.2899	50.2114	57.7627	2	1	3	4	1	3	1.39954	0	3712.64
30	3.06306	16.7233	32.3604	34.5861	49.7828	54.3962	57.8208	2	1	4	1	3	3	1.39731	0	3218.99
