# Supplementary material for: Efficiently handling constraints in mixed-integer nonlinear programming problems using gradient-based repair differential evolution
Source: PeerJ journal article supplement (doi:10.7717/peerj-cs.2095), 2024-05-31
Supplement: Supplemental_File_2.zip [file MI_EDDE.xls]

## Sheet: f1
-7.98899e-16	-1	17	0	4.9919
-0.00148657	-1	17.003	0	7.02531
-0.000843401	-1	17.0017	0	7.04659
-0.00194772	-1	17.0039	0	6.27164
-0.00244245	-1	17.0049	0	6.18895
-6.64908e-05	-1	17.0001	0	6.21328
-0.000134769	-1	17.0003	0	6.24121
-0.0114992	-1	17.0231	0	6.27461
-0.000334506	-1	17.0007	0	6.77529
-0.000611063	-1	17.0012	0	6.20566
-0.000258982	-1	17.0005	0	6.16568
-0.00088051	-1	17.0018	0	6.09147
-0.000884187	-1	17.0018	0	6.163
-1.47298e-16	-1	17	0	6.105
-0.000595155	-1	17.0012	0	6.09115
-0.000946721	-1	17.0019	0	6.09155
-8.49016e-05	-1	17.0002	0	6.12398
-0.000211082	-1	17.0004	0	6.19399
-0.00075456	-1	17.0015	0	6.29508
-0.00251219	-1	17.005	0	6.15706
-0.00511151	-1	17.0102	0	6.12822
-3.87469e-16	-1	17	0	6.11985
-0.0020366	-1	17.0041	0	6.14734
-0.00026333	-1	17.0005	0	6.10398
-0.0011651	-1	17.0023	0	6.12084
-0.000255818	-1	17.0005	0	6.11151
-0.00456147	-1	17.0091	0	6.12217
-6.85533e-16	-1	17	0	6.20943
-9.94622e-16	-1	17	0	6.0902
-0.000747657	-1	17.0015	0	6.12364

## Sheet: f2
4.36625e-09	0	1	2	0	6.1304
-1.02757e-09	0	1	2	0	6.46798
-8.89603e-10	0	1	2	0	6.26029
7.55586e-09	0	1	2	0	6.14393
-6.85744e-09	0	1	2	0	6.39452
5.7733e-09	0	1	2	0	6.42417
1.44509e-08	0	1	2	0	7.09827
5.27775e-09	0	1	2	0	6.15794
7.1583e-09	0	1	2	0	6.65267
2.74742e-09	0	1	2	0	6.30289
-3.43403e-09	0	1	2	0	6.69277
4.39791e-09	0	1	2	0	6.41716
1.74049e-09	0	1	2	0	6.1272
6.47608e-09	0	1	2	0	6.17852
1.71013e-08	0	1	2	0	6.15449
-9.27737e-09	0	1	2	0	6.14211
1.30163e-08	0	1	2	0	6.15293
-3.14378e-09	0	1	2	0	6.10624
7.23735e-09	0	1	2	0	6.38662
-2.11182e-09	0	1	2	0	6.26013
6.77435e-09	0	1	2	0	6.45794
-6.44466e-09	0	1	2	0	6.99938
1.10772e-08	0	1	2	0	7.03332
1.67191e-08	0	1	2	0	6.17445
3.5556e-09	0	1	2	0	6.64618
-1.30559e-08	0	1	2	0	6.701
-1.77623e-08	0	1	2	0	6.1265
-3.66302e-10	0	1	2	0	6.30764
1.31288e-08	0	1	2	0	6.10373
3.13089e-09	0	1	2	0	6.11696

## Sheet: f3
1.5	2	-3.5	0	6.12931
1.5	2	-3.5	0	6.94211
1.5	2	-3.5	0	6.08186
1.5	2	-3.5	0	6.64284
1	3	-4	0	6.13212
1	3	-4	0	6.12736
1.5	2	-3.5	0	6.1034
1.5	2	-3.5	0	6.12634
1.5	2	-3.5	0	6.23532
1.5	2	-3.5	0	6.15758
1	3	-4	0	6.1249
1.5	2	-3.5	0	6.1075
1.5	2	-3.5	0	6.43437
1.5	2	-3.5	0	6.27349
1.5	2	-3.5	0	6.31651
1.5	2	-3.5	0	6.33727
1.5	2	-3.5	0	6.38196
1.5	2	-3.5	0	6.10491
1.5	2	-3.5	0	6.09854
1.5	2	-3.5	0	6.2142
1.5	2	-3.5	0	6.16057
1.5	2	-3.5	0	7.09858
1	3	-4	0	6.15064
1.5	2	-3.5	0	6.35394
1	3	-4	0	6.40531
1.5	2	-3.5	0	6.14061
1.5	2	-3.5	0	6.12872
1.5	2	-3.5	0	6.11445
1.5	2	-3.5	0	6.14456
1.5	2	-3.5	0	6.17996

## Sheet: f4
3	3	-6	0	7.2848
3	3	-6	0	6.0889
3	3	-6	0	6.08989
3	3	-6	0	6.46536
3	3	-6	0	7.34931
3	3	-6	0	6.17508
3	3	-6	0	6.10202
3	3	-6	0	7.01883
3	3	-6	0	6.1809
3	3	-6	0	6.09772
3	3	-6	0	6.09383
3	3	-6	0	6.10876
3	3	-6	0	6.32419
3	3	-6	0	6.19784
3	3	-6	0	6.84766
3	3	-6	0	6.05574
3	3	-6	0	6.0774
3	3	-6	0	6.66042
3	3	-6	0	6.13506
3	3	-6	0	6.30175
3	3	-6	0	6.08776
3	3	-6	0	6.19729
3	3	-6	0	6.13103
3	3	-6	0	6.15288
3	3	-6	0	6.08366
3	3	-6	0	6.6902
3	3	-6	0	6.07623
3	3	-6	0	6.18317
3	3	-6	0	6.49042
3	3	-6	0	6.10951

## Sheet: f5
0.99995	1	0.24995	0	6.08496
0.99995	1	0.24995	0	6.14044
0.99995	1	0.24995	0	6.45215
0.99995	1	0.24995	0	6.349
0.99995	1	0.24995	0	6.53554
0.99995	1	0.24995	0	6.70078
0.99995	1	0.24995	0	6.71686
0.99995	1	0.24995	0	6.48554
0.99995	1	0.24995	0	6.55253
0.99995	1	0.24995	0	6.37674
0.99995	1	0.24995	0	6.36495
0.99995	1	0.24995	0	6.60847
0.99995	1	0.24995	0	6.23672
0.99995	1	0.24995	0	6.48043
0.99995	1	0.24995	0	6.18166
0.99995	1	0.24995	0	6.94069
0.99995	1	0.24995	0	6.39712
0.99995	1	0.24995	0	6.19761
0.99995	1	0.24995	0	6.16028
0.99995	1	0.24995	0	6.1528
0.99995	1	0.24995	0	6.41981
0.99995	1	0.24995	0	7.0419
0.99995	1	0.24995	0	6.46522
0.99995	1	0.24995	0	6.29211
0.99995	1	0.24995	0	6.15966
0.99995	1	0.24995	0	6.22356
0.99995	1	0.24995	0	6.98769
0.99995	1	0.24995	0	6.16408
0.99995	1	0.24995	0	6.16703
0.99995	1	0.24995	0	6.59694

## Sheet: f6
14.225	1	-6783.58	0	6.41107
14.225	1	-6783.58	0	6.29318
14.225	1	-6783.58	0	6.28421
14.225	1	-6783.58	0	6.32861
14.225	1	-6783.58	0	6.40815
14.225	1	-6783.58	0	7.17622
14.225	1	-6783.58	0	6.37655
14.225	1	-6783.58	0	6.66893
14.225	1	-6783.58	0	7.41237
14.225	1	-6783.58	0	6.45518
14.225	1	-6783.58	0	6.98319
14.225	1	-6783.58	0	6.99871
14.225	1	-6783.58	0	6.30314
14.225	1	-6783.58	0	6.58443
14.225	1	-6783.58	0	6.28469
14.225	1	-6783.58	0	6.2864
14.5823	2	-5735.78	0	6.25056
14.225	1	-6783.58	0	6.26774
14.225	1	-6783.58	0	6.82871
14.225	1	-6783.58	0	6.50432
14.225	1	-6783.58	0	6.30206
14.225	1	-6783.58	0	6.29982
14.225	1	-6783.58	0	6.45564
14.225	1	-6783.58	0	6.43477
14.225	1	-6783.58	0	6.30422
14.225	1	-6783.58	0	6.28082
14.225	1	-6783.58	0	6.2949
14.225	1	-6783.58	0	6.36607
14.225	1	-6783.58	0	6.30831
14.5823	2	-5735.78	0	6.30161

## Sheet: f7
0.0222696	-4.19334e-05	-2.99992	-1	0	1	0	6.66455
-1	-2.99999	-0.00710871	0	0	1	0	6.33192
0.0237568	-1.20599e-05	-2.99992	-1	0	1	0	7.01768
-1	0.362364	-2.97805	0	0	1	0	6.42299
0.0065933	-8.20625e-05	-2.99998	-1	0	1	0	6.41608
-1.00002	2.99179	0.221896	0	0	1	0	6.37955
-0.99998	-1.6943	2.47577	0	0	1	0	6.47748
-0.999996	2.87934	0.842216	0	0	1	0	6.30512
-0.999978	2.57638	1.537	0	0	1	0	6.35848
-0.999987	0.793087	2.89326	0	0	1	0	6.28637
-1.00001	2.12929	-2.11331	0	0	1	0	6.26485
-0.999986	-0.463954	2.96391	0	0	1	0	6.324
-1.00002	0.741544	2.90689	0	0	1	0	6.29084
-0.0112094	5.74588e-05	2.99999	-1	0	1	0	6.27996
0.0256254	-8.69312e-05	-2.99988	-1	0	1	0	6.91915
-0.999977	0.696186	-2.91813	0	0	1	0	6.91759
0.0117911	2.80357e-05	-2.99996	-1	0	1	0	6.32637
0.00125413	-8.08764e-06	3.00001	-1	0	1	0	6.2795
-1	-0.125542	-2.99738	0	0	1	0	6.45168
0.0195602	7.81364e-05	-2.99993	-1	0	1	0	6.29608
-1.00002	1.56476	-2.55957	0	0	1	0	6.32702
-0.0300928	9.55748e-05	2.99984	-1	0	1	0	6.31273
-0.999978	-2.99968	-0.0444485	0	0	1	0	6.28366
-1	-2.98801	0.267898	0	0	1	0	6.24954
-0.999984	-2.99955	-0.0519466	0	0	1	0	6.27435
-0.0308001	-6.24578e-05	-2.99985	-1	0	1	0	6.3285
-0.999982	2.32057	1.90131	0	0	1	0	6.35931
-1.00003	-2.93262	0.632231	0	0	1	0	6.50252
0.0118867	-2.58857e-05	2.99996	-1	0	1	0	6.26542
-0.0236917	-6.75344e-05	2.9999	-1	0	1	0	6.30799

## Sheet: f8
100	5500	120.71	277.224	380	35	14	12	7280	0	7.03747
208.333	6000	140	260	360	5	13	14	7288.33	0	7.19472
357.142	5500	160	240	380	14	14	14	7117.14	0	6.41036
357.142	5500	160	240	380	14	14	14	7117.14	0	7.27788
100	6000	120.346	276.546	360	14	13	13	7360	0	6.48076
357.142	5500	160	240	380	14	14	14	7117.14	0	6.72309
566.665	5500	180.952	219.048	380	3	14	15	7106.67	0	6.6963
208.333	6000	140	260	360	5	13	14	7288.33	0	6.71119
100	6000	120.077	276.037	360	14	13	13	7360	0	6.72763
100	6500	120.291	278.286	340	1	12	14	7600	0	6.70098
566.665	5500	180.952	219.048	380	3	14	15	7106.67	0	6.47463
357.142	5500	160	240	380	14	14	14	7117.14	0	7.58803
566.665	5500	180.952	219.048	380	3	14	15	7106.67	0	6.3862
357.142	5500	160	240	380	14	14	14	7117.14	0	7.22804
357.142	5500	160	240	380	14	14	14	7117.14	0	6.50019
357.142	5500	160	240	380	14	14	14	7117.14	0	6.86921
100	6500	120.538	275.326	340	1	12	14	7600	0	7.6639
357.142	5500	160	240	380	14	14	14	7117.14	0	6.95174
357.142	5500	160	240	380	14	14	14	7117.14	0	6.96837
566.665	5500	180.952	219.048	380	3	14	15	7106.67	0	6.38493
100	5500	120.519	278.692	380	35	14	12	7280	0	7.26195
555.554	5000	180	220	400	27	15	14	7075.55	0	6.38959
555.554	5000	180	220	400	27	15	14	7075.55	0	6.6316
357.142	5500	160	240	380	14	14	14	7117.14	0	6.42629
100	6500	120.282	271.53	340	1	12	14	7600	0	6.55479
357.142	5500	160	240	380	14	14	14	7117.14	0	6.48441
100	6000	120.46	278.06	360	14	13	13	7360	0	6.51745
357.142	5500	160	240	380	14	14	14	7117.14	0	6.96367
208.333	5500	140	260	380	24	14	13	7168.33	0	6.38832
357.142	5500	160	240	380	14	14	14	7117.14	0	6.69567

## Sheet: f9
100	6250	100.074	135.933	350	6	5	5	7600	0	6.43845
100	6250	102.399	242.96	350	6	5	5	7600	0	6.61628
100	7500	88.0261	109.844	300	1	4	5	8600	0	6.41265
100	6250	56.3147	158.363	350	15	5	4	8050	0	6.61626
100	6250	110.773	243.935	350	6	5	5	7600	0	6.55459
100	6250	106.628	254.586	350	6	5	5	7600	0	6.38825
100	6250	105.23	162.774	350	6	5	5	7600	0	6.58839
100	6250	114.616	278.202	350	6	5	5	7600	0	6.41917
100	6250	109.719	217.764	350	6	5	5	7600	0	6.3988
100	6250	105.157	233.458	350	6	5	5	7600	0	6.70618
100	7500	56.163	155.114	300	1	4	5	8600	0	6.45033
100	6250	109.693	212.726	350	6	5	5	7600	0	6.37256
100	7500	54.3837	97.5743	300	6	4	4	8850	0	6.40502
100	6250	106.244	265.183	350	6	5	5	7600	0	6.43403
100	6250	108.885	206.629	350	6	5	5	7600	0	6.43949
100	7500	98.198	170.338	300	1	4	5	8600	0	6.59884
100	6250	102.599	221.404	350	6	5	5	7600	0	6.48219
100	6250	101.265	179.996	350	6	5	5	7600	0	6.67261
100	7500	68.8363	161.235	300	1	4	5	8600	0	6.52982
100	6250	108.962	216.194	350	6	5	5	7600	0	6.46719
100	6250	111.945	244.732	350	6	5	5	7600	0	6.41044
100	6250	114.12	224.035	350	6	5	5	7600	0	6.41766
100	6250	103.625	286.431	350	6	5	5	7600	0	6.38522
100	6250	102.212	292.566	350	6	5	5	7600	0	6.36572
100	6250	101.554	166.991	350	6	5	5	7600	0	6.46179
100	6250	52.5561	258.786	350	15	5	4	8050	0	6.58341
100	6250	114.312	234.394	350	6	5	5	7600	0	6.37162
100	6250	108.016	236.778	350	6	5	5	7600	0	6.37222
100	6250	109.379	261.079	350	6	5	5	7600	0	6.41791
100	6250	114.265	231.287	350	6	5	5	7600	0	6.44724

## Sheet: f10
100	7500	45.447	106.302	300	4	2	2	8900	0	6.41602
100	7500	30.2199	31.553	300	4	2	2	8900	0	6.5891
100	7500	113.63	251.399	300	1	2	3	8600	0	6.4502
100	7500	40.9582	53.1424	300	4	2	2	8900	0	6.77453
100	7500	16.8374	318.61	300	4	2	2	8900	0	6.4153
100	7500	43.3374	60.2801	300	4	2	2	8900	0	6.37208
100	7500	51.8427	77.1649	300	4	2	2	8900	0	6.37368
100	7500	104.418	161.007	300	1	2	3	8600	0	6.44686
100	7500	14.8496	74.1081	300	4	2	2	8900	0	6.73247
100	7500	30.3538	129.027	300	4	2	2	8900	0	7.2275
100	7500	102.829	196.275	300	1	2	3	8600	0	7.13158
100	7500	113.624	284.174	300	1	2	3	8600	0	6.46807
100	7500	10.6572	134.818	300	4	2	2	8900	0	6.45049
100	7500	62.3254	25.2654	300	4	2	2	8900	0	6.43667
100	7500	59.1995	277.688	300	4	2	2	8900	0	6.46745
100	7500	42.1621	176.581	300	4	2	2	8900	0	6.93132
100	7500	103.875	210.286	300	1	2	3	8600	0	6.39382
100	7500	60.8428	216.377	300	4	2	2	8900	0	6.55938
100	7500	102.087	295.939	300	1	2	3	8600	0	6.53338
100	7500	10.7064	35.3145	300	4	2	2	8900	0	6.42809
100	7500	47.4649	136.545	300	4	2	2	8900	0	6.41104
100	7500	33.3772	216.467	300	4	2	2	8900	0	6.91607
100	7500	49.5653	75.7421	300	4	2	2	8900	0	6.83978
100	7500	42.1703	226.669	300	4	2	2	8900	0	6.39188
100	7500	27.0179	127.527	300	4	2	2	8900	0	6.4236
100	7500	89.8579	19.1008	300	4	2	2	8900	0	7.15913
100	7500	13.7094	166.115	300	4	2	2	8900	0	6.75388
100	7500	105.239	271.4	300	4	2	2	8900	0	6.37356
100	7500	29.48	209.745	300	4	2	2	8900	0	6.44003
100	7500	114.683	230.633	300	1	2	3	8600	0	6.37733

[truncated: 18 more sheets: f11, f12, f13, f14, f15, f16, f17, f18, f19, f20, f21, f22, f23, f24, f25, f26, f27, f28]
