# Supplementary material for: Efficiently handling constraints in mixed-integer nonlinear programming problems using gradient-based repair differential evolution
Source: PeerJ journal article supplement (doi:10.7717/peerj-cs.2095), 2024-05-31
Supplement: Supplemental_File_2.zip [file MI_EDDE_SOP.xls]

## Sheet: Sheet1
Execution	t1	t2	t3	t4	t5	t6	t7	w1	w2	w3	w4	w5	w6	f(x)	G(x)	Time execution
1	2.72998	5.38857	18.5852	19.5979	42.9798	55.4502	57.202	2	2	3	3	1	3	1.39867	5.4768	783.393
2	4.57217	28.5317	32.059	35.0062	41.2762	60.1028	64.9129	2	4	3	1	3	4	1.74481	5.62895	768.839
3	4.55541	25.5068	30.3403	30.5274	30.8954	34.2124	56.6403	2	3	1	3	4	1	1.7297	3.69183	777.225
4	2.53195	10.6576	17.8185	17.8198	40.0223	53.404	57.7776	2	2	2	3	1	3	1.37447	3.03395	771.546
5	3.00522	17.3427	25.2463	26.6866	29.7711	39.076	57.9865	2	1	4	1	3	1	1.43268	7.05263	762.886
6	2.95466	17.9568	23.6023	40.0525	53.2372	55.3919	57.9699	2	3	3	1	3	3	1.359	4.01665	764.458
7	2.57352	4.89615	16.9086	37.2957	51.9787	58.6125	58.8993	2	2	3	1	3	3	1.33615	5.99752	772.034
8	3.2017	22.0745	25.3347	29.013	32.9589	57.6374	63.3493	2	2	3	4	1	4	1.80033	2.27094	766.99
9	2.77085	15.6616	27.5282	31.1411	40.3772	55.817	57.3874	2	2	4	3	1	1	1.86028	0.0625456	771.17
10	2.95168	26.9706	30.1203	30.3205	42.8405	51.4969	57.611	2	4	3	3	1	1	1.80947	2.04109	773.76
11	2.93983	11.3375	17.8635	33.6174	39.6561	54.2777	57.738	2	2	3	3	1	3	1.3652	3.67523	772.565
12	3.83224	19.2517	22.1027	26.0247	27.5789	38.8988	57.4866	2	2	3	4	3	1	1.56616	4.16096	774.287
13	3.55398	13.7216	14.6484	18.2607	41.2115	55.5298	58.2221	2	2	2	3	1	3	1.35605	5.8755	775.811
14	2.87223	17.9763	40.3597	55.0016	57.4045	57.6094	58.3851	2	3	1	3	3	4	1.37505	3.47568	779.378
15	2.54759	17.716	39.5849	44.6563	54.4221	56.1295	57.6134	2	3	1	1	3	3	1.37834	3.24347	780.549
16	3.12255	18.3111	42.1244	54.621	54.8034	56.0109	57.7031	2	3	1	3	1	3	1.37726	4.84814	771.904
17	2.65901	17.9964	40.1832	53.1107	56.4112	57.1665	57.3838	2	3	1	3	1	2	1.39492	3.27342	782.419
18	3.61382	6.94947	22.7598	25.5512	27.9596	40.206	56.6992	2	2	2	4	3	1	1.72237	4.24202	777.81
19	2.67663	17.9023	34.4859	41.1934	53.1893	55.9216	57.4894	2	3	3	1	1	1	1.39299	3.99024	768.354
20	2.46222	14.9487	16.476	17.8782	40.653	54.2185	57.8438	2	2	2	3	1	3	1.38153	4.38696	779.265
21	2.5061	17.7038	39.7514	53.4918	55.0993	56.3604	57.737	2	3	1	3	1	3	1.38013	3.48289	775.348
22	3.12342	25.4843	27.2198	28.1408	31.3402	40.1653	56.6748	2	1	2	4	3	1	1.79512	8.28931	770.213
23	2.89403	12.4772	18.0626	20.7122	41.1844	56.3619	57.4451	2	2	3	3	1	1	1.38928	4.01603	766.213
24	2.64557	26.875	30.1589	38.5937	38.6781	38.9861	56.816	2	4	3	4	3	1	1.83763	3.23305	778.775
25	2.64848	6.84679	18.2342	18.469	33.1573	39.5168	57.6129	2	2	4	3	3	1	1.42182	6.90397	774.066
26	3.02663	18.2515	30.8265	41.908	42.0704	53.1552	58.248	2	3	3	1	1	3	1.35923	5.18367	768.927
27	3.40143	25.5115	28.1485	28.578	31.1463	48.1051	58.2163	2	3	2	4	3	1	1.71305	4.97433	774.82
28	3.61031	19.4971	26.2067	29.1673	36.3548	49.1583	56.2507	2	2	4	3	1	1	1.77461	6.01816	781.425
29	2.77026	24.9759	27.623	44.3799	45.8692	46.2674	58.7409	2	4	3	2	4	1	1.82438	8.08609	780.052
30	2.66225	17.71	39.1909	51.682	55.1144	56.4659	57.9375	2	3	1	3	1	3	1.36476	3.65524	772.594
