# Supplementary material for: Efficiently handling constraints in mixed-integer nonlinear programming problems using gradient-based repair differential evolution
Source: PeerJ journal article supplement (doi:10.7717/peerj-cs.2095), 2024-05-31
Supplement: Supplemental_File_2.zip [file PSOmv.xlsx]

## Sheet: f1
-7.25126e-16	-1	17	0	4.93982
-7.53963e-16	-1	17	0	5.06046
-3.94273e-16	-1	17	0	4.9178
6.36502e-17	-1	17	0	4.92333
-7.09052e-16	-1	17	0	4.85021
-2.25641e-16	-1	17	0	4.91868
-6.01634e-16	-1	17	0	4.88213
-7.96998e-17	-1	17	0	4.90017
-4.52828e-16	-1	17	0	4.80655
-7.26524e-16	-1	17	0	4.8538
-3.49928e-16	-1	17	0	4.81731
8.83143e-18	-1	17	0	4.85213
-3.60885e-16	-1	17	0	4.7288
-2.57664e-16	-1	17	0	4.75699
-8.55796e-16	-1	17	0	4.81028
-7.23997e-16	-1	17	0	4.77915
-4.57601e-16	-1	17	0	4.79143
-2.05615e-17	-1	17	0	4.76329
-8.61179e-16	-1	17	0	4.73347
-3.9558e-16	-1	17	0	4.76745
6.13772e-17	-1	17	0	4.74689
-2.75667e-18	-1	17	0	4.77994
-1.35723e-16	-1	17	0	4.81021
-5.09894e-16	-1	17	0	4.8666
-5.59171e-16	-1	17	0	4.78005
-7.67566e-16	-1	17	0	4.78936
-4.75991e-18	-1	17	0	4.78474
5.19309e-17	-1	17	0	4.83862
-4.00559e-16	-1	17	0	4.84313
-4.39012e-16	-1	17	0	4.80609

## Sheet: f2
1.51168e-08	1	0	4	0	36.3474
6.25915e-09	1	1	1	0	35.8414
6.63979e-09	1	1	1	0	35.8079
5.00396e-09	0	1	2	0	36.1755
1.29611e-08	1	0	4	0	36.1461
-3.46078e-09	1	0	4	0	36.1441
2.30986e-09	0	1	2	0	35.9518
1.50707e-08	0	1	2	0	35.6555
-2.32641e-09	0	1	2	0	35.8141
-1.18983e-08	1	0	4	0	35.8851
3.24199e-09	0	1	2	0	36.2721
-1.11168e-08	0	1	2	0	35.5853
1.9002e-08	1	0	4	0	35.6683
-9.99297e-09	0	1	2	0	36.0298
-1.32722e-08	0	1	2	0	35.7137
-2.00453e-08	1	0	4	0	35.7746
2.76508e-09	0	1	2	0	35.5984
-8.83297e-09	0	-1	10	0	35.6319
6.55344e-09	0	1	2	0	35.7753
-1.12631e-08	0	1	2	0	36.0706
-3.3718e-11	0	1	2	0	35.95
2.12946e-08	0	-1	10	0	36.0434
4.01495e-09	0	1	2	0	35.6254
1.00856e-08	0	1	2	0	35.9699
8.31931e-09	0	1	2	0	35.6386
1.74034e-08	0	1	2	0	36.4011
7.18718e-09	0	1	2	0	35.6994
2.74651e-10	0	1	2	0	35.6012
9.51737e-09	0	1	2	0	35.7392
3.82992e-09	0	1	2	0	35.7568

## Sheet: f3
1.5	2	-3.5	0	20.1668
0.995836	3	-3.99584	0	20.2605
1.5	2	-3.5	0	20.8164
1.5	2	-3.5	0	20.9
1.5	2	-3.5	0	20.7084
1.5	2	-3.5	0	20.5984
1.5	2	-3.5	0	20.5993
1.5	2	-3.5	0	20.8464
0.999121	3	-3.99912	0	20.9506
1.5	2	-3.5	0	20.9265
1.5	2	-3.5	0	21.0769
1.5	2	-3.5	0	20.733
1.5	2	-3.5	0	20.7152
1.5	2	-3.5	0	20.7762
1.5	2	-3.5	0	20.7313
1.5	2	-3.5	0	20.8332
0.99812	3	-3.99812	0	20.6043
1.5	2	-3.5	0	20.6327
1.5	2	-3.5	0	20.9311
1.5	2	-3.5	0	20.5392
0.997086	3	-3.99709	0	21.2154
1.5	2	-3.5	0	21.1967
1.5	2	-3.5	0	20.6424
1.5	2	-3.5	0	20.6684
1.5	2	-3.5	0	20.7027
1.5	2	-3.5	0	20.7456
1.5	2	-3.5	0	20.8714
1.5	2	-3.5	0	20.8486
1.5	2	-3.5	0	20.8947
1.5	2	-3.5	0	20.6874

## Sheet: f4
3	3	-6	0	20.9496
3	3	-6	0	20.8685
3	3	-6	0	20.6563
3	3	-6	0	20.7622
3	3	-6	0	20.8658
3	3	-6	0	20.1587
3	3	-6	0	20.5831
3	3	-6	0	20.6072
3	3	-6	0	20.8992
3	3	-6	0	21.1202
3	3	-6	0	20.7926
3	3	-6	0	20.6425
3	3	-6	0	20.7687
3	3	-6	0	20.7524
3	3	-6	0	20.7352
3	3	-6	0	20.9567
3	3	-6	0	21.0679
3	3	-6	0	20.7575
3	3	-6	0	20.6701
3	3	-6	0	21.7341
3	3	-6	0	20.691
3	3	-6	0	21.2999
3	3	-6	0	20.6765
3	3	-6	0	20.8761
3	3	-6	0	20.8756
3	3	-6	0	20.4107
3	3	-6	0	20.4991
3	3	-6	0	20.8408
3	3	-6	0	20.6653
3	3	-6	0	20.7029

## Sheet: f5
0.999977	1	0.249977	0	7.59664
1.00001	1	0.250011	0	7.95468
0.01	0	1.2401	0	7.23979
0.01	0	1.2401	0	7.09928
0.01	0	1.2401	0	7.91826
0.01	0	1.2401	0	7.66742
0.01	0	1.2401	0	8.17079
0.01	0	1.2401	0	7.68105
0.01	0	1.2401	0	7.85076
0.01	0	1.2401	0	7.62067
0.01	0	1.2401	0	7.93365
0.01	0	1.2401	0	7.57534
0.01	0	1.2401	0	7.59673
0.01	0	1.2401	0	7.80425
0.01	0	1.2401	0	7.60568
0.01	0	1.2401	0	7.63915
0.01	0	1.2401	0	7.67082
0.01	0	1.2401	0	7.73235
0.01	0	1.2401	0	7.74661
0.01	0	1.2401	0	7.6919
0.01	0	1.2401	0	7.65597
0.01	0	1.2401	0	7.62765
0.01	0	1.2401	0	7.82126
0.01	0	1.2401	0	7.94621
0.01	0	1.2401	0	7.88969
0.01	0	1.2401	0	7.65352
0.01	0	1.2401	0	7.67074
0.01	0	1.2401	0	7.74855
0.01	0	1.2401	0	7.81715
0.01	0	1.2401	0	7.74051

## Sheet: f6
14.225	1	-6783.58	0	20.9327
14.225	1	-6783.58	0	21.0001
14.225	1	-6783.58	0	20.7642
14.225	1	-6783.58	0	20.7961
14.225	1	-6783.58	0	20.7169
14.225	1	-6783.58	0	20.9418
14.225	1	-6783.58	0	20.6115
14.225	1	-6783.58	0	20.2456
14.225	1	-6783.58	0	20.564
14.225	1	-6783.58	0	20.7064
14.225	1	-6783.58	0	20.5899
14.225	1	-6783.58	0	20.6874
14.225	1	-6783.58	0	20.5844
14.225	1	-6783.58	0	20.8924
14.5823	2	-5735.78	0	20.0834
14.5823	2	-5735.78	0	20.7543
14.5823	2	-5735.78	0	20.7307
14.8255	3	-4800.64	0	20.606
14.5823	2	-5735.78	0	20.7406
14.5823	2	-5735.78	0	20.4733
14.5823	2	-5735.78	0	20.6494
14.8255	3	-4800.64	0	20.8682
14.5823	2	-5735.78	0	20.6019
14.5823	2	-5735.78	0	20.7387
14.5823	2	-5735.78	0	20.9409
14.5823	2	-5735.78	0	20.6517
14.5823	2	-5735.78	0	21.0347
14.5823	2	-5735.78	0	20.6884
14.5823	2	-5735.78	0	20.7594
14.963	4	-3973.76	0	20.8716

## Sheet: f7
-1.00003	0.223055	-2.9917	0	0	1	0	14.3947
-0.999748	1.25736	2.72387	0	0	1	0.000657036	14.4987
-1.00001	2.99998	0.0039223	0	0	1	0	18.446
-0.999974	1.6588	2.49968	0	0	1	0	18.2603
0.036885	-7.44114e-05	2.99979	-1	0	1	0	18.1061
-0.99999	-0.220645	2.99188	0	0	1	0	18.0579
-1.00001	-0.339185	-2.98077	0	0	1	0	18.1571
-0.999994	2.23474	-2.00147	0	0	1	0	18.3353
-0.999973	0.0304337	2.99986	0	0	1	0	18.1098
-0.999975	-1.56654	2.55853	0	0	1	0	18.295
-0.999992	3	-0.000960847	0	0	1	0	18.1275
-0.999996	2.93017	0.643518	0	0	1	0	18.7018
-0.999981	-0.246219	2.98989	0	0	1	0	18.3602
-1	0.270881	-2.98774	0	0	1	0	18.0116
-1	-0.118667	2.99767	0	0	1	0	18.0795
-1	0.316218	-2.9833	0	0	1	0	18.5544
-0.999973	0.448387	-2.9663	0	0	1	0	18.2935
-0.999997	0.697026	-2.91792	0	0	1	0	18.4052
-0.999996	-0.124977	-2.9974	0	0	1	0	18.0725
-1.00002	0.80228	2.89074	0	0	1	0	18.4879
-0.999955	2.45197	-1.72856	0	0	1	3.35145e-05	18.3866
-0.999971	-0.754477	-2.9036	0	0	1	0	18.5593
-1.00001	-0.0407058	-2.99972	0	0	1	0	18.1996
-1.00003	-2.92708	-0.657293	0	0	1	0	18.1247
-0.0443097	-6.88823e-06	-2.99968	-1	0	1	0	18.2127
-1.00002	-2.64943	-1.40731	0	0	1	0	18.1362
-0.999969	-0.791652	2.89367	0	0	1	0	18.1566
-1	-2.98454	0.304144	0	0	1	0	18.1816
-1.00003	0.471381	2.96274	0	0	1	0	18.0744
-0.99999	-0.408659	-2.97202	0	0	1	0	17.8987

## Sheet: f8
8145.29	7265.87	276.162	123.046	534.775	433	23	15	25051.2	0.209595	107.578
1250	3500	220	180	460	250	18	13	10730	0	106.432
7499.99	4000	280	120	440	166	17	17	15800	0	112.57
10000	6967.36	284.615	115.385	405.386	276	17	18	23467.4	0.0384615	112.593
10000	6847.6	284.615	115.385	458.321	154	18	18	20907.6	0.0884615	113.221
3333.33	3500	260	140	460	204	18	15	11893.3	0	112.24
3333.33	3500	260	140	460	195	18	15	11713.3	0	113.345
7499.99	3500	280	120	460	127	18	16	14520	0	111.781
7499.99	4000	280	120	440	91	17	17	14300	0	112.399
10000	4237.72	284.615	115.385	505.031	335	23	16	21917.7	0.238461	111.684
10000	6088.15	284.615	115.385	513.926	252	23	18	22108.1	0.338461	110.341
3333.33	4000	260	140	440	50	17	16	9313.33	0	110.873
1250	4500	220	180	420	162	16	15	9970	0	110.943
7499.99	3000	280	120	480	312	19	15	17720	0	110.756
1944.44	4000	240	160	440	172	17	15	10364.4	0	110.664
1250	4000	220	180	440	107	17	14	8370	0	110.929
3333.33	4000	260	140	440	155	17	16	11413.3	0	110.455
10000	7163.72	284.615	115.385	465.079	316	19	18	24463.7	0.138461	111.2
3333.33	4500	260	140	420	53	16	17	9873.33	0	110.488
7499.99	5000	280	120	400	25	15	19	13980	0	110.441
3333.33	4000	260	140	440	180	17	16	11913.3	0	111.13
7499.99	3500	280	120	460	117	18	16	14320	0	111.085
1250	4000	220	180	440	104	17	14	8310	0	111.525
10000	7373.12	284.615	115.385	442.634	224	18	17	22833.1	0.0384615	110.527
3333.33	4500	260	140	420	176	16	17	12333.3	0	110.168
10000	6169.87	284.615	115.385	493.921	372	20	18	24589.9	0.188461	110.605
7499.99	3500	280	120	460	193	18	16	15840	0	111.137
7499.99	3500	280	120	460	163	18	16	15240	0	110.716
10000	5841.79	284.615	115.385	466.959	425	19	19	25321.8	0.188461	110.754
10000	6345.71	284.615	115.385	464.127	326	19	16	23845.7	0.0384615	110.485

## Sheet: f9
2500	3750	250	150	450	52	7	6	9800	0	56.0012
9820.26	7032.57	284.177	115.763	461.04	164	8	6	26002.8	0.039557	55.8266
10000	7334.17	284.615	115.385	459.481	74	8	7	21984.2	0.163461	63.0254
8280.98	4731.34	278.198	119.791	526.975	178	9	6	22862.3	0.179506	62.3386
10000	7076.85	284.615	115.385	464.387	170	8	6	26526.9	0.0384615	62.5261
2500	3750	250	150	450	51	7	6	9750	0	62.4804
10000	7109.48	284.615	115.385	428.646	129	7	9	24509.5	0.288461	63.3651
6540.5	6221.22	226.562	153.585	482.99	166	8	5	22011.7	0.0585938	62.6463
10000	6985.03	284.615	115.385	474.477	36	8	7	19735	0.163461	62.4327
2500	3750	250	150	450	157	7	6	15050	0	62.5704
10000	6897.26	284.615	115.385	393.4	96	6	8	22647.3	0.0384615	62.5704
10000	6352.23	284.615	115.385	448.567	172	8	6	25902.2	0.0384615	62.9156
2500	3750	250	150	450	37	7	6	9050	0	63.1411
2500	3750	250	150	450	156	7	6	15000	0	62.6877
10000	7578.87	284.615	115.385	487.375	176	8	6	27328.9	0.0384615	62.5395
2500	3750	250	150	450	82	7	6	11300	0	63.8307
7298.96	6089.89	227.941	133.246	480.036	176	8	5	23138.8	0.0551471	62.5388
10000	5110.28	284.615	115.385	456.937	172	8	6	24660.3	0.0384615	62.7604
2500	3750	250	150	450	56	7	6	10000	0	62.5799
10000	5863.25	284.615	115.385	467.093	169	8	6	25263.2	0.0384615	62.5635
10000	5115.85	284.615	115.385	467.639	172	8	6	24665.9	0.0384615	63.15
10000	8008.5	284.615	115.385	463.016	77	8	7	22808.5	0.163461	63.0985
2500	3750	250	150	450	37	7	6	9050	0	62.7157
10000	4949.22	284.615	115.385	486.631	169	8	6	24349.2	0.0384615	62.6194
833.332	3750	200	200	450	94	7	5	10233.3	0	62.6637
10000	7535.47	284.615	115.385	408.5	47	7	7	20835.5	0.0384615	63.8026
10000	6966.49	284.615	115.385	478.198	112	8	7	23516.5	0.163461	62.8775
2500	3750	250	150	450	53	7	6	9850	0	62.5731
10000	6819.07	284.615	115.385	489.848	169	8	6	26219.1	0.0384615	62.6943
2500	3750	250	150	450	38	7	6	9100	0	62.6326

## Sheet: f10
10000	9289.06	284.615	115.385	439.567	13	4	4	21489.1	0.288461	45.3022
10000	8472.9	284.615	115.385	465.79	90	4	3	28372.9	0.0384615	46.1919
10000	6028.21	284.615	115.385	491.151	89	4	3	25828.2	0.0384615	51.5658
10000	7047.91	284.615	115.385	456.766	75	4	4	25447.9	0.288461	51.8602
10000	6096.43	284.615	115.385	463.238	91	4	3	26096.4	0.0384615	51.5509
10000	7801.22	284.615	115.385	477.391	91	4	3	27801.2	0.0384615	52.4348
9732.01	4175.98	284.076	115.877	493.715	82	4	3	23008	0.0398089	51.4686
10000	6759.97	284.615	115.385	473.739	89	4	3	26560	0.0384615	51.4593
10000	9121.33	284.615	115.385	476.301	91	4	3	29121.3	0.0384615	51.6477
9206.92	6522.18	282.993	116.626	477.431	77	4	3	24329.1	0.042517	51.5538
833.332	5000	200	200	400	58	3	3	12533.3	0	51.3607
10000	7049.07	284.615	115.385	474.418	89	4	3	26849.1	0.0384615	51.5102
10000	3595.73	284.615	115.385	486.817	41	4	4	18595.7	0.288461	51.7451
10000	8344.15	284.615	115.385	380.202	25	3	4	21744.1	0.0384615	52.4142
9850.13	6166.87	284.076	115.866	491.471	82	4	3	25117	0.0398089	51.8603
10000	9299.95	284.615	115.385	455.013	86	4	3	28800	0.0384615	51.4742
833.332	5000	200	200	400	40	3	3	10733.3	0	51.3991
10000	6859.59	284.615	115.385	459.664	87	4	3	26459.6	0.0384615	52.3333
10000	6441.31	284.615	115.385	455.77	87	4	3	26041.3	0.0384615	51.5945
10000	7968.37	284.615	115.385	441.414	87	4	3	27568.4	0.0384615	51.4842
10000	6272.79	284.615	115.385	489.345	87	4	3	25872.8	0.0384615	51.6844
10000	8204.13	284.615	115.385	484.103	85	4	3	27604.1	0.0384615	51.5982
10000	6944.03	284.615	115.385	449.918	90	4	3	26844	0.0384615	51.6861
8144.66	6294.24	141.176	110.658	476.883	46	4	2	19938.9	0.147059	51.6279
10000	7060.04	284.615	115.385	472.402	91	4	3	27060	0.0384615	51.8075
9970.38	5295.32	284.472	115.467	464.948	84	4	3	24565.7	0.0388199	51.7292
10000	4466.1	284.615	115.385	489.146	86	4	3	23966.1	0.0384615	51.6983
10000	5481.27	284.615	115.385	485.658	86	4	3	24981.3	0.0384615	51.6145
10000	8805.21	284.615	115.385	478.224	31	4	4	22805.2	0.288461	52.5139
10000	7923.13	284.615	115.385	454.41	91	4	3	27923.1	0.0384615	51.6037

[truncated: 18 more sheets: f11, f12, f13, f14, f15, f16, f17, f18, f19, f20, f21, f22, f23, f24, f25, f26, f27, f28]
