# Supplementary material for: Efficiently handling constraints in mixed-integer nonlinear programming problems using gradient-based repair differential evolution
Source: PeerJ journal article supplement (doi:10.7717/peerj-cs.2095), 2024-05-31
Supplement: Supplemental_File_2.zip [file SADE_CaR.xls]

## Sheet: f1
-1	0	13	0	6.15458
-1	0	13	0	5.49422
-1	0	13	0	5.33596
-1	0	13	0	5.13904
-1	0	13	0	5.56715
-1	0	13	0	5.50794
-1	0	13	0	5.15359
-1	0	13	0	5.35597
-1	0	13	0	5.23641
-1	0	13	0	5.39912
-1	0	13	0	5.18297
-1	0	13	0	5.20779
-1	0	13	0	5.14257
-1	0	13	0	5.35677
-1	0	13	0	5.09481
-1	0	13	0	5.11316
-1	0	13	0	5.12853
-1	0	13	0	5.14895
-1	0	13	0	5.18272
-1	0	13	0	5.07836
-1	0	13	0	5.06789
-1	0	13	0	5.06794
-1	0	13	0	5.21224
-1	0	13	0	5.17768
-1	0	13	0	5.41014
-1	0	13	0	5.47239
-1	0	13	0	5.18974
-1	0	13	0	5.98094
-1	0	13	0	5.18623
-1	0	13	0	5.1682

## Sheet: f2
9.38502e-09	1	1	1	0	10.4094
-9.66853e-09	1	1	1	0	11.0732
5.33875e-09	1	1	1	0	10.3587
-1.0097e-08	1	1	1	0	10.5903
1.91552e-09	1	1	1	0	10.7829
4.73472e-09	1	1	1	0	10.536
9.44234e-09	1	1	1	0	10.3957
-3.97302e-09	1	1	1	0	10.525
-5.88238e-09	1	1	1	0	10.5412
7.68389e-09	1	1	1	0	11.2307
1.04392e-08	1	1	1	0	10.571
-5.56505e-09	1	1	1	0	11.2572
5.86254e-09	1	1	1	0	10.5019
9.97359e-09	1	1	1	0	10.4979
-5.45872e-09	1	1	1	0	11.1379
9.10023e-09	1	1	1	0	10.5972
-9.34609e-09	1	1	1	0	10.8596
7.66144e-09	1	1	1	0	10.5245
6.51674e-09	1	1	1	0	11.0247
-6.65088e-09	1	1	1	0	10.6257
-2.9773e-09	1	1	1	0	10.5966
1.59929e-09	1	1	1	0	11.2766
-6.8308e-09	1	1	1	0	10.4689
8.39964e-09	1	1	1	0	10.513
5.04447e-09	1	1	1	0	10.5152
-7.71921e-09	1	1	1	0	10.5415
9.30581e-09	1	1	1	0	11.133
1.02519e-08	1	1	1	0	10.5584
-3.69632e-10	1	1	1	0	10.479
7.24022e-09	1	1	1	0	10.4652

## Sheet: f3
1	3	-4	0	5.36963
1	3	-4	0	5.28238
1	3	-4	0	5.13385
1	3	-4	0	5.25899
1	3	-4	0	5.20545
1	3	-4	0	5.44098
1	3	-4	0	5.29396
1	3	-4	0	5.87079
1	3	-4	0	6.09885
1	3	-4	0	5.28674
1	3	-4	0	5.18784
1	3	-4	0	5.32027
1	3	-4	0	5.93775
1	3	-4	0	5.31473
1	3	-4	0	5.63881
1	3	-4	0	5.28358
1	3	-4	0	5.59867
1	3	-4	0	5.21494
1	3	-4	0	5.32729
1	3	-4	0	5.24654
1	3	-4	0	5.96726
1	3	-4	0	5.56002
1	3	-4	0	5.28417
1	3	-4	0	5.2084
1	3	-4	0	5.32371
1	3	-4	0	5.1587
1	3	-4	0	5.17109
1	3	-4	0	5.1845
1	3	-4	0	5.21698
1	3	-4	0	5.25159

## Sheet: f4
3	3	-6	0	5.24204
3	3	-6	0	5.12006
3	3	-6	0	5.16401
3	3	-6	0	5.22574
3	3	-6	0	5.81829
3	3	-6	0	5.22243
3	3	-6	0	5.22968
3	3	-6	0	5.09875
3	3	-6	0	5.1382
3	3	-6	0	5.22871
3	3	-6	0	5.17295
3	3	-6	0	5.2427
3	3	-6	0	5.2297
3	3	-6	0	5.16329
3	3	-6	0	5.45572
3	3	-6	0	5.43021
3	3	-6	0	5.19144
3	3	-6	0	5.18958
3	3	-6	0	5.20809
3	3	-6	0	5.10528
3	3	-6	0	5.26833
3	3	-6	0	5.06018
3	3	-6	0	5.11805
3	3	-6	0	5.30196
3	3	-6	0	5.94022
3	3	-6	0	5.43321
3	3	-6	0	5.29521
3	3	-6	0	5.20373
3	3	-6	0	5.41628
3	3	-6	0	6.08653

## Sheet: f5
0.99995	1	0.24995	0	5.73772
0.99995	1	0.24995	0	5.79802
0.99995	1	0.24995	0	6.0165
0.99995	1	0.24995	0	5.51241
0.99995	1	0.24995	0	5.57662
0.99995	1	0.24995	0	6.12234
0.99995	1	0.24995	0	5.71598
0.99995	1	0.24995	0	5.28369
0.99995	1	0.24995	0	5.59719
0.99995	1	0.24995	0	5.53601
0.99995	1	0.24995	0	5.84986
0.99995	1	0.24995	0	5.84111
0.99995	1	0.24995	0	5.59064
0.99995	1	0.24995	0	5.27991
0.99995	1	0.24995	0	5.57706
0.99995	1	0.24995	0	5.51422
0.99995	1	0.24995	0	5.56891
0.99995	1	0.24995	0	5.98237
0.99995	1	0.24995	0	5.56434
0.99995	1	0.24995	0	5.58435
0.99995	1	0.24995	0	5.57055
0.99995	1	0.24995	0	5.25772
0.99995	1	0.24995	0	5.61272
0.99995	1	0.24995	0	5.57085
0.99995	1	0.24995	0	5.609
0.99995	1	0.24995	0	5.60112
0.99995	1	0.24995	0	5.5314
0.99995	1	0.24995	0	5.55853
0.99995	1	0.24995	0	5.54009
0.99995	1	0.24995	0	5.55107

## Sheet: f6
14.225	1	-6783.58	0	5.15485
14.225	1	-6783.58	0	5.15262
14.225	1	-6783.58	0	5.11466
14.225	1	-6783.58	0	5.1987
14.225	1	-6783.58	0	5.15227
14.225	1	-6783.58	0	5.15043
14.225	1	-6783.58	0	5.24611
14.225	1	-6783.58	0	5.13226
14.225	1	-6783.58	0	5.10852
14.225	1	-6783.58	0	5.46498
14.225	1	-6783.58	0	5.61631
14.225	1	-6783.58	0	5.10957
14.225	1	-6783.58	0	5.14537
14.225	1	-6783.58	0	5.84364
14.225	1	-6783.58	0	5.17048
14.225	1	-6783.58	0	5.18231
14.225	1	-6783.58	0	5.13276
14.225	1	-6783.58	0	5.14891
14.225	1	-6783.58	0	5.12391
14.225	1	-6783.58	0	5.12825
14.225	1	-6783.58	0	5.22714
14.225	1	-6783.58	0	5.99671
14.225	1	-6783.58	0	5.20707
14.225	1	-6783.58	0	5.15983
14.225	1	-6783.58	0	5.17314
14.225	1	-6783.58	0	5.66841
14.225	1	-6783.58	0	5.16134
14.225	1	-6783.58	0	5.16642
14.225	1	-6783.58	0	5.18827
14.225	1	-6783.58	0	5.15011

## Sheet: f7
-0.999968	0.572408	-2.9449	0	0	1	0	9.7923
-1.00003	2.99032	-0.240785	0	0	1	0	11.1825
-0.999972	-0.280164	-2.98691	0	0	1	0	10.414
-1.00002	2.96189	-0.476606	0	0	1	0	11.2073
-1	2.99619	-0.151458	0	0	1	0	10.3598
-0.999984	2.99631	-0.14875	0	0	1	0	10.4787
-1.00001	2.9643	0.461426	0	0	1	0	10.4323
-1.00001	1.70696	2.46702	0	0	1	0	10.3783
-1.00003	0.731157	-2.90952	0	0	1	0	9.86235
-1.00003	-2.98219	-0.326305	0	0	1	0	11.1222
-0.999967	-0.1326	2.99709	0	0	1	0	9.23939
-1.00003	-2.96682	0.444761	0	0	1	0	10.9044
-0.999997	-2.99784	0.113999	0	0	1	0	11.2572
-0.999994	0.166978	-2.99534	0	0	1	0	10.8932
-0.999971	2.9916	-0.224612	0	0	1	0	11.4133
-0.999992	-2.97729	0.368317	0	0	1	0	10.8295
-1.00001	-2.98313	0.317573	0	0	1	0	10.8617
-1.00003	-2.51239	-1.63948	0	0	1	0	10.188
-0.999977	-2.98525	0.297278	0	0	1	0	10.6171
-1	-1.25978	-2.72266	0	0	1	0	10.7726
-0.999971	-1.55449	-2.56588	0	0	1	0	10.6248
-0.999971	-1.39635	2.65524	0	0	1	0	10.8289
-1.00003	2.98044	0.341818	0	0	1	0	10.9219
-1	0.765974	2.90056	0	0	1	0	10.1999
-1.00003	-2.83931	-0.968617	0	0	1	0	10.8011
-1.00003	0.341998	-2.98043	0	0	1	0	10.603
-1.00002	-1.81168	2.39117	0	0	1	0	11.3001
-0.99999	2.99873	-0.0874113	0	0	1	0	11.246
-0.999998	-2.99655	0.14383	0	0	1	0	10.5068
-0.999999	-0.0352264	-2.99981	0	0	1	0	11.1464

## Sheet: f8
555.554	5000	180	220	400	26	15	14	7055.55	0	9.50902
555.554	5000	180	220	400	26	15	14	7055.55	0	9.36401
555.554	5000	180	220	400	26	15	14	7055.55	0	9.44516
555.554	5000	180	220	400	26	15	14	7055.55	0	9.47502
555.554	5000	180	220	400	26	15	14	7055.55	0	9.44629
555.554	5000	180	220	400	26	15	14	7055.55	0	9.82999
566.665	5500	180.952	219.048	380	3	14	15	7106.67	0	9.93979
555.554	5000	180	220	400	26	15	14	7055.55	0	10.2253
555.554	5000	180	220	400	26	15	14	7055.55	0	10.2197
555.554	5000	180	220	400	26	15	14	7055.55	0	9.31884
555.554	5000	180	220	400	26	15	14	7055.55	0	9.50216
556.855	5001.12	180	219.811	399.999	26	15	14	7057.98	0	9.51989
555.554	5000	180	220	400	26	15	14	7055.55	0	9.8566
555.554	5000	180	220	400	26	15	14	7055.55	0	9.53533
555.554	5000	180	220	400	26	15	14	7055.55	0	10.595
555.554	5000	180	220	400	26	15	14	7055.55	0	10.1295
555.554	5000	180	220	400	26	15	14	7055.55	0	9.48694
555.554	5000	180	220	400	26	15	14	7055.55	0	9.61153
555.554	5000	180	220	400	26	15	14	7055.55	0	9.52088
555.554	5000	180	220	400	26	15	14	7055.55	0	9.29303
555.554	5000	180	220	400	26	15	14	7055.55	0	9.44513
555.554	5000	180	220	400	26	15	14	7055.55	0	9.30105
555.554	5000	180	220	400	26	15	14	7055.55	0	9.51944
555.554	5000	180	220	400	26	15	14	7055.55	0	9.26621
555.635	5000.16	180	219.998	399.998	26	15	14	7055.8	0	9.42012
555.554	5000	180	220	400	26	15	14	7055.55	0	10.4108
555.554	5000	180	220	400	26	15	14	7055.55	0	10.3306
555.554	5000	180	220	400	26	15	14	7055.55	0	9.69217
555.554	5000	180	220	400	26	15	14	7055.55	0	9.35192
555.554	5000	180	220	400	26	15	14	7055.55	0	9.40623

## Sheet: f9
833.332	5000	200	200	400	6	6	6	7083.33	0	9.50903
833.572	5000.24	200.001	199.972	399.999	6	6	6	7083.81	0	10.5837
833.332	5000	200	200	400	6	6	6	7083.33	0	10.3081
833.332	5000	200	200	400	6	6	6	7083.33	0	9.19658
833.332	5000	200	200	400	6	6	6	7083.33	0	9.98227
277.777	5000	150	250	400	19	6	5	7177.78	0	9.40891
833.332	5000	200	200	400	6	6	6	7083.33	0	9.95695
833.332	5000	200	200	400	6	6	6	7083.33	0	9.67357
833.332	5000	200	200	400	6	6	6	7083.33	0	9.47518
833.332	5000	200	200	400	6	6	6	7083.33	0	9.52535
833.332	5000	200	200	400	6	6	6	7083.33	0	9.97891
833.332	5000	200	200	400	6	6	6	7083.33	0	9.73296
833.332	5000	200	200	400	6	6	6	7083.33	0	10.3905
833.332	5000	200	200	400	6	6	6	7083.33	0	10.2238
833.332	5000	200	200	400	6	6	6	7083.33	0	10.9937
833.332	5000	200	200	400	6	6	6	7083.33	0	9.41353
833.332	5000	200	200	400	6	6	6	7083.33	0	9.38773
833.332	5000	200	200	400	6	6	6	7083.33	0	9.64084
833.332	5000	200	200	400	6	6	6	7083.33	0	10.333
833.332	5000	200	200	400	6	6	6	7083.33	0	10.0622
833.332	5000	200	200	400	6	6	6	7083.33	0	10.0494
833.332	5000	200	200	400	6	6	6	7083.33	0	9.21697
833.332	5000	200	200	400	6	6	6	7083.33	0	9.557
833.332	5000	200	200	400	6	6	6	7083.33	0	9.5596
833.358	5000.02	200	199.999	400	6	6	6	7083.38	0	9.49938
833.332	5000	200	200	400	6	6	6	7083.33	0	9.253
833.332	5000	200	200	400	6	6	6	7083.33	0	9.78859
833.332	5000	200	200	400	6	6	6	7083.33	0	9.73333
833.332	5000	200	200	400	6	6	6	7083.33	0	9.36093
833.332	5000	200	200	400	6	6	6	7083.33	0	9.39024

## Sheet: f10
833.332	5000	200	200	400	4	3	3	7133.33	0	10.1637
833.332	5000	200	200	400	4	3	3	7133.33	0	10.2898
833.332	5000	200	200	400	4	3	3	7133.33	0	10.4455
100	5000	100	237.101	400	16	3	2	7600	0	10.2104
833.332	5000	200	200	400	4	3	3	7133.33	0	9.57552
833.332	5000	200	200	400	4	3	3	7133.33	0	9.43264
833.332	5000	200	200	400	4	3	3	7133.33	0	9.53866
833.332	5000	200	200	400	4	3	3	7133.33	0	9.68478
833.332	5000	200	200	400	4	3	3	7133.33	0	9.45656
833.332	5000	200	200	400	4	3	3	7133.33	0	9.59899
833.332	5000	200	200	400	4	3	3	7133.33	0	9.52035
833.332	5000	200	200	400	4	3	3	7133.33	0	9.51628
833.332	5000	200	200	400	4	3	3	7133.33	0	9.56401
833.332	5000	200	200	400	4	3	3	7133.33	0	9.56616
833.332	5000	200	200	400	4	3	3	7133.33	0	9.53009
833.332	5000	200	200	400	4	3	3	7133.33	0	9.92454
833.332	5000	200	200	400	4	3	3	7133.33	0	10.0577
833.332	5000	200	200	400	4	3	3	7133.33	0	9.35479
833.332	5000	200	200	400	4	3	3	7133.33	0	9.44237
833.332	5000	200	200	400	4	3	3	7133.33	0	9.65668
833.332	5000	200	200	400	4	3	3	7133.33	0	9.52987
833.332	5000	200	200	400	4	3	3	7133.33	0	10.7089
833.332	5000	200	200	400	4	3	3	7133.33	0	9.55997
833.332	5000	200	200	400	4	3	3	7133.33	0	9.52657
833.332	5000	200	200	400	4	3	3	7133.33	0	9.51815
833.332	5000	200	200	400	4	3	3	7133.33	0	9.36703
833.332	5000	200	200	400	4	3	3	7133.33	0	9.35571
833.332	5000	200	200	400	4	3	3	7133.33	0	9.35345
833.332	5000	200	200	400	4	3	3	7133.33	0	9.93822
833.332	5000	200	200	400	4	3	3	7133.33	0	10.3292

[truncated: 18 more sheets: f11, f12, f13, f14, f15, f16, f17, f18, f19, f20, f21, f22, f23, f24, f25, f26, f27, f28]
