# Supplementary material for: Efficiently handling constraints in mixed-integer nonlinear programming problems using gradient-based repair differential evolution
Source: PeerJ journal article supplement (doi:10.7717/peerj-cs.2095), 2024-05-31
Supplement: Supplemental_File_2.zip [file SADE_CaR_SOP.xlsx]

## Sheet: Sheet1
Execution	t1	t2	t3	t4	t5	t6	t7	w1	w2	w3	w4	w5	w6	f(x)	G(x)	Time execution
1	2.73122	19.244	20.4698	28.5314	33.1886	56.334	56.3936	2	2	2	4	1	3	1.94817	0.0280067	1644.9
2	4.71101	25.84	26.0036	30.1847	33.1986	43.0808	58.994	2	1	3	4	1	3	1.64556	2.69464	1643.22
3	3.28424	14.5755	28.4209	31.6227	53.3385	54.3531	58.0105	2	2	4	3	2	1	1.86766	4.93892	1631.98
4	3.16623	17.7813	21.464	36.1975	40.2229	54.5371	58.4117	2	3	3	3	1	3	1.35004	4.93381	1628.84
5	4.85531	18.3715	27.9205	30.8784	42.1148	47.5372	57.3597	2	2	4	3	1	1	1.7733	2.21685	1648.04
6	3.7481	21.1147	28.896	34.7747	38.5061	51.1493	59.6918	2	2	4	2	3	1	2.13091	6.91117	1635.4
7	7.63835	10.7785	17.2061	31.1551	35.1259	51.2622	58.0229	2	2	2	4	1	3	1.81438	3.00186	1633.99
8	2.77258	12.6511	17.7134	36.5938	38.4853	52.6414	57.7351	2	2	3	3	1	3	1.36094	4.69099	1644.54
9	3.00668	17.8045	19.3898	36.8566	39.0385	53.8367	57.7662	2	3	3	3	1	3	1.35999	4.9954	1623.11
10	2.93203	8.72123	18.1246	36.49	41.3971	53.6453	58.0199	2	2	3	3	1	3	1.36424	5.74826	1637.78
11	4.13497	18.6096	36.6031	37.4624	41.3562	57.9602	57.9905	2	3	3	3	1	3	1.36546	6.38212	1647.12
12	3.39073	18.3673	23.4244	39.6535	49.4445	50.101	58.5577	2	3	3	1	3	3	1.33513	5.93448	1625.47
13	2.76022	10.1598	27.1815	34.9311	40.3611	43.1469	57.8873	2	2	4	2	3	1	2.32334	4.98713	1639.32
14	3.59008	4.92671	18.3019	37.2548	41.4273	57.852	58.2023	2	2	3	3	1	4	1.37228	5.33511	1642.78
15	2.73478	16.4367	20.3138	36.6939	40.3301	45.2847	57.5608	2	1	3	3	1	1	1.34036	4.26438	1628.65
16	3.13513	27.8342	33.0269	37.2895	44.7844	50.896	58.0241	2	4	2	3	3	1	2.09941	3.22984	1639.18
17	2.64783	18.0388	36.4108	40.5138	44.7906	50.1401	58.4334	2	3	3	1	1	3	1.35389	5.36357	1624.51
18	2.7319	18.0795	35.9762	36.3566	41.6839	50.0926	57.3771	2	3	3	3	1	1	1.3956	4.00973	1632.82
19	3.58824	25.6096	28.3706	40.4625	40.4809	52.6687	59.1427	2	4	3	3	1	3	1.69989	5.07152	1631.93
20	3.89801	21.3978	28.7376	31.8031	38.6944	51.6348	58.113	2	2	4	3	3	1	1.79064	7.32572	1639.92
21	3.43126	18.5122	20.2832	35.9004	40.6111	52.0178	57.9462	2	3	3	3	1	3	1.35405	5.16292	1617.28
22	5.071	11.2564	17.5737	29.2692	33.7559	46.1654	57.362	2	2	2	4	1	1	1.89037	1.09011	1620.55
23	4.76605	14.6395	23.4593	29.7247	30.4721	33.4097	57.3763	2	2	3	2	4	1	1.67126	1.85922	1635.77
24	4.46303	28.6603	32.1267	37.8745	46.492	52.7801	58.4569	2	4	3	1	3	3	1.77343	0.667264	1640.65
25	6.10321	12.8854	30.5262	36.1713	38.6972	50.6773	59.1034	2	2	4	2	1	3	2.02844	6.57653	1641.2
26	5.96613	28.6753	31.8405	41.4418	48.7609	58.058	58.1516	2	4	3	1	1	2	1.78152	4.64278	1637.42
27	4.28754	25.6283	30.4759	32.9833	41.6914	49.9348	58.3423	2	3	4	3	1	3	1.64421	1.53891	1639.32
28	2.98582	18.0939	18.2125	36.3832	41.2609	57.326	58.3951	2	2	3	3	1	4	1.39091	5.48896	1644.85
29	3.71987	28.9745	32.5982	33.7324	39.0952	49.1109	59.0653	2	4	3	3	3	1	1.83978	4.86773	1626.5
30	2.57519	4.71656	17.8893	39.0496	46.8199	48.9806	59.2001	2	2	3	1	3	3	1.3355	6.11061	1634.74
